# Supplementary material
Source: PubMed Central journal article supplement (PMC8673909)
Supplement: NIHMS1738950-supplement-5.pdf [file NIHMS1738950-supplement-5.pdf]

# Design and synthesis of 3,3'-triazolyl biisoquinoline *N,N'*-dioxides via Hiyama coupling of 4-trimethylsilyl-1,2,3-triazoles

Shiyu Sun,<sup>§</sup> Carlyn Reep,<sup>§</sup> Chenrui Zhang,<sup>§</sup> Burjor Captain,<sup>‡</sup> Roberto Peverati,<sup>\*,§</sup> and  
Norito Takenaka<sup>\*,§</sup>

<sup>§</sup>Department of Biomedical and Chemical Engineering and Sciences,  
Florida Institute of Technology, 150 West University Boulevard,  
Melbourne, Florida 32901-6975, United States

[rpeverati@fit.edu](mailto:rpeverati@fit.edu), [ntakenaka@fit.edu](mailto:ntakenaka@fit.edu)

<sup>‡</sup>Department of Chemistry, University of Miami, 1301 Memorial Drive, Coral Gables, FL  
33146-0431, United States

[captain@miami.edu](mailto:captain@miami.edu)

## Supporting Information

### Table of Contents

|                                                      |     |
|------------------------------------------------------|-----|
| 1. General Information                               | S2  |
| 2. Experimental Procedures                           | S3  |
| 3. Computational Procedures                          | S23 |
| 4. Crystallographic Experimental Section             | S24 |
| 5. Reference                                         | S30 |
| 6. <sup>1</sup> H and <sup>13</sup> C NMR Spectra    | S33 |
| 7. HPLC Traces for Enantiomeric Excess Determination | S61 |

## 1. General Information.

All reactions were carried out in oven- or flame-dried glassware under an atmosphere of dry argon or nitrogen unless otherwise noted. Except as otherwise indicated, all reactions were magnetically stirred and monitored by analytical thin-layer chromatography using SiliCycle® Inc. pre-coated silica gel plates with F<sub>254</sub> indicator. Visualization was accomplished by UV light (254 nm), with combination of potassium permanganate, *p*-anisaldehyde, and/or cerium molybdate solution as an indicator. Flash column chromatography was performed according to the method of Still<sup>[1]</sup> using silica gel 60 (mesh 230-400) supplied by SiliCycle® Inc or aluminum oxide (basic, 50-200µm, 60A). Yields refer to chromatographically and spectroscopically pure compounds, unless otherwise stated. Commercial grade reagents and solvents were purchased from Sigma-Aldrich, Alfa-Aesar, Acros, Fisher, TCI, and VWR, and were used as received without further purification except as indicated below. THF was freshly distilled over sodium/benzophenone under an atmosphere of dry nitrogen prior to use. CH<sub>2</sub>Cl<sub>2</sub> and CH<sub>3</sub>CN were freshly distilled over CaH<sub>2</sub> under an atmosphere of dry nitrogen prior to use. All <sup>1</sup>H NMR and <sup>13</sup>C NMR spectra were obtained using a Bruker 400 Ultrashield or an Oxford AS400 Spectrometer (<sup>1</sup>H 400 MHz, <sup>13</sup>C 100 MHz) at ambient temperature in CDCl<sub>3</sub> purchased from Cambridge Isotope Laboratories, Inc. Chemical shifts in <sup>1</sup>H NMR spectra are reported in parts per million (ppm) relative to tetramethylsilane (δ 0.00 ppm) unless otherwise noted. The proton spectra are reported as follows δ (multiplicity, coupling constant *J*, number of protons). Multiplicities are indicated by s (singlet), d (doublet), t (triplet), q (quartet), m (multiplet), and br (broad). Chemical shifts

in  $^{13}\text{C}$  NMR spectra are reported in ppm respective to  $\text{CDCl}_3$  ( $\delta$  77.0 ppm). All  $^{13}\text{C}$  NMR spectra were recorded with complete proton decoupling. Infrared (IR) spectra were recorded using a Nicolet iS5 FT-IR instrument. HRMS data were obtained at USF Mass Spec and Peptide Core Facility in Department of Chemistry at University of South Florida, and the Chouinard research group Department of Biomedical and Chemical Engineering and Sciences, Florida Institute of Technology. Optical rotations were measured using a Jasco P2000 Polarimeter at 589 nm and were reported as  $[\alpha]_{\text{D}}^{\text{T } ^\circ\text{C}}$ , where C is reported in g/mL. Chiral HPLC analysis was performed on Varian Polaris HPLC system with a diode array detector using analytical chiral columns (250 x 4.6 mm, L x I.D.) purchased from CHIRAL TECHNOLOGIES, INC. (CHIRALCEL<sup>®</sup> OD-H). Compounds that are not numbered in the manuscript are labeled as **S1**, **S2**, etc.

## 2. Experimental Procedures.

### Representative Attempted Sonogashira Reaction.<sup>[2]</sup>

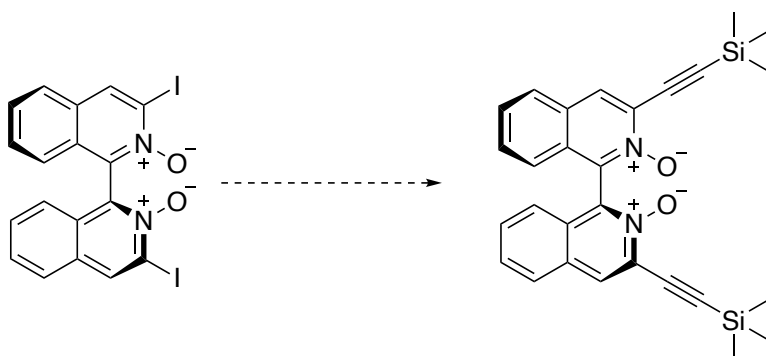

(*S*)-3,3'-Diiodo-1,1'-biisoquinoline *N,N'*-dioxide (50 mg, 0.093 mmol),  $\text{CuI}$  (4.2 mg, 0.022 mmol), and  $\text{PdCl}_2(\text{PPh}_3)$  (10.4 mg, 0.015 mmol) were charged in a round bottom flask with a stir egg, then vacuumed and back-filled with argon five times. Freshly distilled  $\text{Et}_3\text{N}$  (1 mL) and THF (1 mL) were added into the reaction mixture followed by

adding trimethylsilylacetylene (38  $\mu$ L, 0.28 mmol), reaction was stirred at rt overnight. The reaction mixture was diluted in  $\text{CH}_2\text{Cl}_2$ , filtered through celite and concentrated *in vacuo*.

The TLC and  $^1\text{H}$  NMR analysis of the crude reaction mixture indicated that all starting materials used completely decomposed.

#### Synthesis of (S)-3,3'-diiodo-1,1'-biisoquinoline N, N'-dioxide (4):

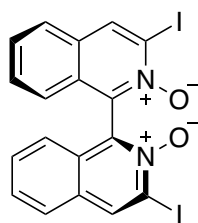

Following our previously reported procedure,<sup>[3]</sup> to a solution of LDA in THF (0.22 M, 2.0 mL) in a 25 mL round-bottom flask at  $-78\text{ }^\circ\text{C}$  was added a solution of (S)-1,1'-biisoquinoline N,N'-dioxide (50 mg, 0.173 mmol) in THF (7 mL) dropwise by a canula. The reaction mixture was stirred for 4 hours at  $-78\text{ }^\circ\text{C}$ , treated dropwise with a solution of iodine (264 mg, 1.04 mmol) in THF (2 mL) by a canula at  $-78\text{ }^\circ\text{C}$ , and stirred for an additional 16 hours at  $-78\text{ }^\circ\text{C}$ . The reaction was warmed to rt and quenched with 10% sodium thiosulfate solution (50 mL). The aqueous layer was back-extracted with  $\text{CH}_2\text{Cl}_2$  (25 mL x 2). The combined organic layers were dried over  $\text{Na}_2\text{SO}_4$ , filtered, and concentrated *in vacuo*. The resulting crude material was purified by flash chromatography on basic aluminum oxide with 1% MeOH in  $\text{CH}_2\text{Cl}_2$  to afford the title compound as a yellow solid (64 mg, 68%).

$^1\text{H}$  NMR (400 MHz,  $\text{CDCl}_3$ )  $\delta$  8.56 (s, 2H), 7.80 (d,  $J = 8.0$  Hz, 2H), 7.57 (dd,  $J = 8.0, 8.0$  Hz, 2H), 7.46 (dd,  $J = 8.4, 8.4$  Hz, 2H), 7.05 (d,  $J = 8.4$  Hz, 2H)

$^{13}\text{C}$  NMR (100 MHz,  $\text{CDCl}_3$ )  $\delta$  137.1, 136.3, 130.4, 129.3, 129.3, 128.8, 126.1, 123.3, 108.6

IR (thin film): 1345, 1220, 749, 538, 529  $\text{cm}^{-1}$

HRMS (ESI): Exact mass calculated for  $\text{C}_{18}\text{H}_{11}\text{I}_2\text{N}_2\text{O}_2^+$   $[\text{M}+\text{H}]^+$  expected: 540.8905, found: 540.8900

$[\alpha]_{\text{D}}^{25} = +21.9$  ( $c = 0.001$ ,  $\text{CH}_2\text{Cl}_2$ )

### Synthesis of (S)-3,3'-dibromo-1,1'-biisoquinoline N, N'-dioxide (5):

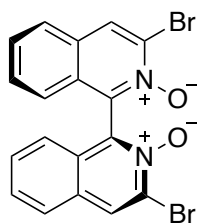

The title compound was prepared accordingly to our previously reported procedure.<sup>[3]</sup>

### Synthesis of 4-TMS triazoles.

**Caution:** Organic azides have the potential to decompose violently upon input of external energy. While we experienced no explosions handling or producing the azides used for this work, safety precautions including adequate shielding are strongly encouraged. All organic azides used in the following procedures were synthesized according to literature procedures without modification.<sup>[4]</sup>

**CuAAC Representative Procedure A:** The protocol reported by Jeong and Ryu was used without further optimization.<sup>[5]</sup>

### 1-Benzyl-4-(trimethylsilyl)-1H-1,2,3-triazole (6a)

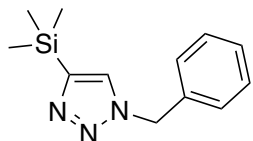

Benzyl azide (1.278 g, 9.6 mmol), trimethylsilylacetylene (1.33 mL, 9.6 mmol), CuSO<sub>4</sub>·5H<sub>2</sub>O (120 mg, 0.48 mmol), and sodium ascorbate (190 mg, 0.96 mmol) were suspended in a mixed solution of tert-butyl alcohol/water (0.25M, 1:1). The mixture was stirred at room temperature under an atmosphere of nitrogen for 24 hours. The mixture was poured into 50 mL water and extracted with CH<sub>2</sub>Cl<sub>2</sub> (50 mL x 2). The combined organic layers were dried over Na<sub>2</sub>SO<sub>4</sub> and concentrated *in vacuo*. The crude residue was purified by flash column chromatography using 20% EtOAc in hexanes as eluent to afford the product as an off-white solid (1.9 g, 86%). All spectral data were identical to the literature values. [5]

### CuAAC Representative Procedure B:[6]

#### 1-Mesityl-4-(trimethylsilyl)-1H-1,2,3-triazole (6b)

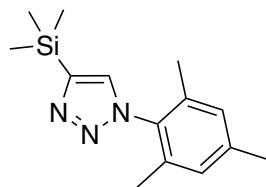

**Caution:** This procedure involves overheating of a THF solution about 25 °C above its boiling point (65-67 °C) in a tightly closed reaction vessel, thus it is suggested that the reaction be conducted behind a blast shield in an efficient fume hood.

Mesityl azide (6.4 g, 40 mmol), trimethylsilylacetylene (11.1 mL, 80 mmol), CuI (1.52 g, 8 mmol), and *N,N*-diisopropylethylamine (27.8 mL, 160 mmol) were suspended in THF

(1.0 M) degassed by purging with argon for 30 mins in a round bottom flask with a stir egg. The flask was sealed with a septum that was then tied up with a piece of copper wire. The reaction mixture was stirred in an oil bath at 90 °C for 17 hours. The reaction mixture was washed with 150 mL saturated aqueous ammonium chloride and extracted with EtOAc (100 mL x 2). The combined organic extracts were washed with water and brine, dried over Na<sub>2</sub>SO<sub>4</sub>, and concentrated *in vacuo*. The crude reaction mixture was purified by flash column chromatography using 5% EtOAc in hexanes as eluent. The resulting product was further purified by precipitating the title compound as a white solid from hexanes (4.83 g, 47%).

<sup>1</sup>H NMR (400 MHz, CDCl<sub>3</sub>) δ 7.57 (s, 1H), 6.98 (s, 2H), 2.35 (s, 3H) 1.93 (s, 6H), 0.39 (s, 9H)

<sup>13</sup>C NMR (100 MHz, CDCl<sub>3</sub>) δ 146.2, 139.6, 135.1, 133.5, 130.6, 128.9, 21.0, 17.2, -1.1

IR (thin film): 3123, 2953, 1609, 1493, 1442, 1249, 1133, 835 cm<sup>-1</sup>

HRMS (ESI): Exact mass calculated for C<sub>14</sub>H<sub>22</sub>N<sub>3</sub>Si<sup>+</sup> [M+H]<sup>+</sup> expected: 260.1578, found: 260.1591.

### 1-(Diphenylmethyl)-4-(trimethylsilyl)-1H-1,2,3-triazole (6c)

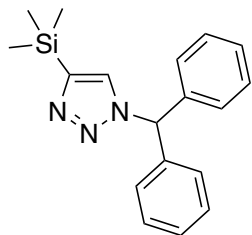

The representative procedure B was followed with trimethylsilylacetylene (17.6 mL, 127.5 mmol), the corresponding azide (13.34 g, 63.8 mmol) and Et<sub>3</sub>N instead of *N,N*-diisopropylethylamine. The reaction was stirred at 60°C for 3 days. The resulting crude

material was purified by flash column chromatography using 10% EtOAc in hexanes then 20% EtOAc in hexanes to give the product as a white solid (5.47 g, 28% yield).

$^1\text{H}$  NMR (400 MHz,  $\text{CDCl}_3$ )  $\delta$  7.39-7.32 (m, 6H), 7.16 (s, 1H), 7.12-7.08 (m, 4H), 0.30 (s, 9H)

$^{13}\text{C}$  NMR (100 MHz,  $\text{CDCl}_3$ )  $\delta$  146.3, 138.5, 128.8, 128.7, 128.4, 128.1, 67.5, -1.1

IR (thin film): 2958, 1450, 1406, 1245, 1109, 836  $\text{cm}^{-1}$

HRMS (ESI): Exact mass calculated for  $\text{C}_{18}\text{H}_{22}\text{N}_3\text{Si}^+$   $[\text{M}+\text{H}]^+$  expected: 308.1578, found: 308.1583.

#### **1-(1-Adamantyl)-4-(trimethylsilyl)-1*H*-1,2,3-triazole (6d)**

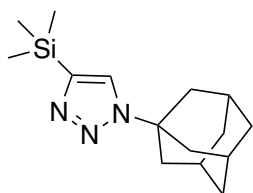

The representative procedure B was followed with trimethylsilylacetylene (11.1 mL, 80 mmol), and the corresponding azide (7.09 g, 40 mmol). The reaction mixture was stirred in an oil bath at 90 °C for 17 hours. The crude was purified by flash column chromatography using 10% EtOAc in hexanes as eluent to give product as a white solid (8.29 g, 75%).

$^1\text{H}$  NMR (400MHz,  $\text{CDCl}_3$ )  $\delta$  7.57 (s, 1H), 2.26 (s, 9H), 1.80 (s, 6H), 0.32 (s, 9H)

$^{13}\text{C}$  NMR (100 MHz,  $\text{CDCl}_3$ )  $\delta$  145.0, 124.9, 59.0, 43.1, 36.0, 29.5, -1.0

IR (thin film): 3087, 2910, 2851, 1487, 1454, 1241, 1058, 833  $\text{cm}^{-1}$

HRMS (ESI): Exact mass calculated for  $\text{C}_{15}\text{H}_{25}\text{N}_3\text{NaSi}^+$   $[\text{M}+\text{Na}]^+$  expected: 298.1710, found: 298.1730.



### **Regarding the Choice of 4-Silyl-1,2,3-triazoles.**

For the following reasons, we thought it would be beneficial if we could utilize readily available 4-trimethylsilyl-5-unsubstituted-1,2,3-triazoles for Hiyama coupling.

To the best of our knowledge, there is only one Chinese patent (Preparation method of silane-modified polyether resin for MS sealant. CN110776632) with respect to the cycloaddition of ethynyltrialcoxysilanes and azides. Furthermore, ethynyltrimethoxysilane is only commercially available from two companies in China (Chemieliva Pharmaceutical Co., Ltd.) and Hong Kong (Hong Kong Chemhere Co., Ltd.). As such, we decided not to begin the project by this route because the information available to us is very limited.

The most common method for the preparation of silanols and silanol surrogates involves the reaction of a silicon electrophile with an organometallic reagent (lithium or magnesium) generated from a corresponding halide.<sup>[7]</sup> The direct synthesis of 4-halo-5-unsubstituted-1,2,3-triazoles (i.e., cycloaddition of azides with bromoethyne or iodoethyne) remains elusive<sup>[8]</sup> and thus they are commonly synthesized from 4-trimethylsilyl-5-unsubstituted-1,2,3-triazoles and *N*-halosuccinimides.<sup>[9]</sup> Likewise, the direct preparation of 4-magnesio (or lithio)-5-unsubstituted-1,2,3-triazoles (i.e., cycloaddition of azides with ethynylmagnesium halide or lithium acetylide) remains elusive, too.<sup>[10]</sup> The direct lithiation of 1-substituted-1,2,3-triazoles with *n*BuLi or LiTMP strongly favors 5-lithiation over 4-lithiation.<sup>[11]</sup>

### **Evaluation of Reaction Conditions for Hiyama Cross-coupling.**

**Fluoride Sources:** We evaluated KF, CsF, DAST (diethylaminosulfurtrifluoride), TASF (tris(dimethylamino)sulfonium difluorotrimethylsilicate), and TBAF·4*t*BuOH<sup>[12]</sup> under otherwise identical reaction conditions for TBAF·3H<sub>2</sub>O. TASF gave 8% yield but all others produced trace amount.

**Metal Additives:** We evaluated AgBF<sub>4</sub>, silver(II) oxide, CuI, CuCl, and copper(II) oxide under otherwise identical reaction conditions for Ag<sub>2</sub>O. Silver(II) oxide gave 23% yield but all others produced trace amount.

**Solvents:** We evaluated 1,4-dioxane, DME, toluene, CH<sub>2</sub>Cl<sub>2</sub>, Et<sub>3</sub>N, and diisopropylamine but all were less effective than THF.

**Reducing Sources for PdCl<sub>2</sub>(dppp):** We expected to observe the formation of 1,1'-dibenzyl-4,4'-bi-1*H*-1,2,3-triazole if a cross-coupling nucleophile generated from **6a** reduced a Pd(II) pre-catalyst. However, we did not find 1,1'-dibenzyl-4,4'-bi-1*H*-1,2,3-triazole in the crude reaction mixture. As such, we set up a reaction without electrophile **5** and found that the amount of 1,1'-dibenzyl-4,4'-bi-1*H*-1,2,3-triazole formed corresponded to only 30% of Pd(II) used. In reference to the fluoride-promoted R<sub>3</sub>P-mediated reduction method reported,<sup>[13]</sup> we tested a Hiyama coupling reaction with an extra equivalent of dppp, and **3a** formed in only 27% yield compared to 41% under the standard conditions (vide infra). Pd(0)-dppp complex generated according to the reported method<sup>[14]</sup> provided mono-coupled product **S1** as a major product.

**Hiyama cross-coupling of (S)-3,3'-dibromo-1,1'-biisoquinoline N, N'-dioxide with 4-TMS triazoles.**

**(S)-3,3'-Bis-(1-benzyl-1H-1,2,3-triazole-4-yl)-1,1'-biisoquinoline N, N'-dioxide (3a)**

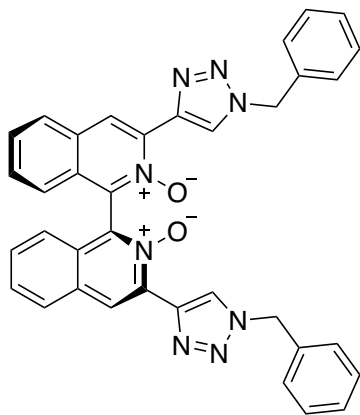

**Hiyama Cross-coupling Representative Procedure:** THF was degassed by bubbling argon for 30 mins. (S)-3,3'-Dibromo-1,1'-biisoquinoline N, N'-dioxide prepared accordingly to our published procedure<sup>[3]</sup> (500 mg, 1.12 mmol), the corresponding 4-TMS triazole (1.24 g, 5.38 mmol), and PdCl<sub>2</sub>(dppp) (264 mg, 0.448 mmol), were charged in a flame-dried round bottom flask with a stir egg. Ag<sub>2</sub>O (1.25 g, 5.38 mmol) was weighed in the dark and added to the flask. The reaction flask was covered with foil and vacuumed and back-filled with argon five times. THF (44 mL, 0.025 M) was added, followed by a solution of TBAF·3H<sub>2</sub>O (1.70 g, 5.38 mmol) in THF (5.4 mL, 1M). The reaction was stirred at 40 °C for overnight. The reaction was cooled to room temperature then poured into 112 mL of saturated NaHCO<sub>3</sub> solution and stirred for 15 mins. The reaction was then filtered through celite, extracted with CH<sub>2</sub>Cl<sub>2</sub> (100 mL x2), dried over Na<sub>2</sub>SO<sub>4</sub>, filtered, and concentrated *in vacuo*. The resulting crude was purified by flash column chromatography on silica gel with 1% MeOH in CH<sub>2</sub>Cl<sub>2</sub>. The resulting

product was further purified by precipitating the title compound as an off-white solid from a mixture of CH<sub>2</sub>Cl<sub>2</sub> and toluene (309 mg, 46%).

<sup>1</sup>H NMR (400 MHz, CDCl<sub>3</sub>) δ 9.16 (s, 2H), 8.83 (s, 2H), 8.02 (d, *J* = 8.0 Hz, 2H), 7.58 (dd, *J* = 7.2, 7.2 Hz, 2H), 7.41 (dd, *J* = 7.6, 7.6 Hz, 2H), 7.34-7.25 (m, 10H), 7.03 (d, *J* = 8.4 Hz, 2H), 5.55 (d, *J* = 14.8 Hz, 2H), 5.51 (d, *J* = 14.8 Hz, 2H);

<sup>13</sup>C NMR (100 MHz, CDCl<sub>3</sub>) δ 139.1, 138.9, 138.4, 133.9, 130.0, 129.1, 129.0, 128.9, 128.8, 128.4, 127.9, 127.8, 126.6, 123.0, 122.5, 54.3;

IR (thin film): 3056, 2923, 1454, 1434, 1314, 1224, 749 cm<sup>-1</sup>

HRMS (ESI): Exact mass calculated for C<sub>36</sub>H<sub>27</sub>N<sub>8</sub>O<sub>2</sub><sup>+</sup> [M+H]<sup>+</sup> expected: 603.2251, found: 603.2252.

[α]<sub>D</sub><sup>25</sup> = +61.56 (c = 0.0025, CH<sub>2</sub>Cl<sub>2</sub>)

**(S)-3-(1-Benzyl-1*H*-1,2,3-triazole-4-yl)-3'-bromo-1,1'-biisoquinoline *N,N'*-dioxide**

**(S1)**

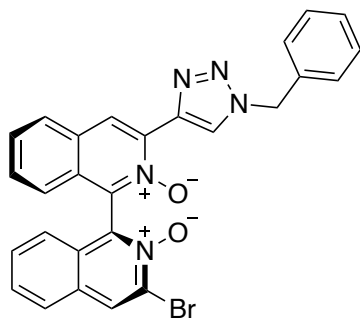

We combined fractions of the reaction mixtures containing trace amount of the title compound, which were produced during the reaction optimization study, and purified it by prep TLC with 5% MeOH in CH<sub>2</sub>Cl<sub>2</sub> to obtain 9 mg of the title compound as an off-white solid for characterization purposes.

$^1\text{H}$  NMR (400 MHz,  $\text{CDCl}_3$ )  $\delta$  9.14 (s, 1H), 8.83 (s, 1H), 8.34 (s, 1H), 8.03 (d,  $J = 8.4$  Hz, 1H), 7.83 (d,  $J = 8.4$  Hz, 1H), 7.62-7.55 (m, 2H), 7.46-7.42 (m, 2H), 7.34-7.28 (m, 5H), 7.08-7.03 (m, 2H), 5.58 (d,  $J = 14.8$  Hz, 1H), 5.54 (d,  $J = 14.8$  Hz, 1H)

$^{13}\text{C}$  NMR (100 MHz,  $\text{CDCl}_3$ )  $\delta$  139.2, 138.9, 138.8, 138.0, 134.0, 131.2, 130.3, 129.9, 129.1, 129.1, 129.0, 128.9, 128.9, 128.6, 128.4, 127.9, 126.6, 126.4, 123.4, 123.1, 122.7, 55.4 (six signals overlap to give three signals).

IR (thin film): 3056, 2923, 1454, 1434, 1314, 1224, 1137, 749, 650  $\text{cm}^{-1}$

HRMS (ESI): Exact mass calculated for  $\text{C}_{27}\text{H}_{19}\text{BrN}_5\text{O}_2^+$   $[\text{M}+\text{H}]^+$  expected: 524.0717, found 524.0714.

$[\alpha]_{\text{D}}^{25} = +18.2$  ( $c = 0.001$ ,  $\text{CH}_2\text{Cl}_2$ )

**(S)-3,3'-Bis-(1-mesityl-1H-1,2,3-triazole-4-yl)-1,1'-biisoquinoline N, N'-dioxide (3b)**

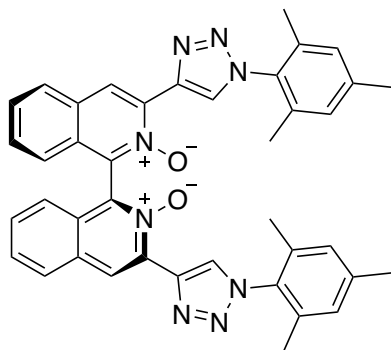

The representative procedure was followed with (S)-3,3'-dibromo-1,1'-biisoquinoline N, N'-dioxide (446 mg, 1.00 mmol) and the corresponding 4-TMS triazole (1.245 g, 4.8 mmol). The resulting crude material was purified by flash column chromatography on silica gel with 26% EtOAc in hexanes to afford the title compound as an off-white solid (353 mg, 54%).

$^1\text{H}$  NMR (400 MHz,  $\text{CDCl}_3$ )  $\delta$  9.30 (s, 2H), 9.00 (s, 2H), 8.08 (d,  $J = 8.2$  Hz, 2H), 7.63 (dd,  $J = 7.6, 7.6$  Hz, 2H), 7.48 (dd,  $J = 8.0, 8.0$  Hz, 2H), 7.14 (d,  $J = 8.4$  Hz, 2H), 6.97 (s, 4H), 2.33 (s, 6H), 1.99 (s, 12H)

$^{13}\text{C}$  NMR (100 MHz,  $\text{CDCl}_3$ )  $\delta$  140.1, 139.1, 138.8, 138.6, 135.0, 133.1, 130.0, 129.1, 129.1, 129.0, 128.7, 128.1, 127.9, 123.2, 122.7, 21.1, 17.4

IR (thin film): 2921, 2851, 1610, 1491, 1459, 1313, 1226, 1038, 728  $\text{cm}^{-1}$

HRMS (ESI): Exact mass calculated for  $\text{C}_{40}\text{H}_{35}\text{N}_8\text{O}_2^+$   $[\text{M}+\text{H}]^+$  expected: 659.2877, found: 659.2889.

$[\alpha]_{\text{D}}^{25} = +73.3$  ( $c = 0.001$ ,  $\text{CH}_2\text{Cl}_2$ )

### (S)-3-(1-Mesityl-1*H*-1,2,3-triazole-4-yl)-3'-bromo-1,1'-biisoquinoline *N, N'*-dioxide

#### (S2)

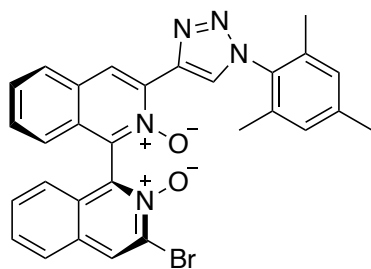

THF was degassed by bubbling nitrogen for 15 mins. (S)-3,3'-Dibromo-1,1'-biisoquinoline *N, N'*-dioxide (223 mg, 0.5 mmol), the corresponding 4-TMS triazole (623 mg, 2.4 mmol),  $\text{PdCl}_2(\text{dppp})$  (118 mg, 0.2 mmol), and silver(II) oxide (556 mg, 4.49 mmol) were charged in a flame-dried round bottom flask with a stir egg. The reaction flask was covered with foil and vacuumed and back-filled with argon five times. THF (20 mL, 0.025M) was added, followed by a solution of TBAF $\cdot$ 3H $_2$ O (757 mg, 2.4 mmol) in THF (2.4 mL, 1M). The reaction was stirred at 40  $^\circ\text{C}$  for 2 hours. The reaction was

cooled to room temperature then poured into 50 mL of saturated NaHCO<sub>3</sub> solution and stirred for 15 mins. The reaction was then filtered through celite, extracted with CH<sub>2</sub>Cl<sub>2</sub> (50 mL x2), dried over Na<sub>2</sub>SO<sub>4</sub>, filtered, and concentrated *in vacuo*. The resulting crude mixture was purified by flash column chromatography on silica gel with 45% EtOAc in hexanes to afford the title compound as a pale brown solid (53 mg, 19%). When Hiyama representative procedure is used (*vide supra*), this compound remains only in trace quantities.

<sup>1</sup>H NMR (400 MHz, CDCl<sub>3</sub>) δ 9.26 (s, 1H), 8.97 (s, 1H), 8.36 (s, 1H), 8.06 (d, *J* = 8.2, 1H), 7.85 (d, *J* = 8.2 Hz, 1H), 7.64-7.56 (m, 2H), 7.49-7.44 (m, 2H), 7.13 (d, *J* = 8.5 Hz, 1H), 7.08 (d, *J* = 8.5 Hz, 1H), 6.86 (s, 2H), 2.34 (s, 3H), 2.00 (s, 1H)

<sup>13</sup>C NMR (100 MHz, CDCl<sub>3</sub>) δ 140.0, 139.0, 138.9, 138.7, 138.0, 135.0, 133.1, 131.1, 130.2, 129.9, 129.1, 128.9, 128.9, 128.9, 128.6, 127.9, 127.8, 126.4, 123.4, 123.0, 122.8, 21.1, 17.3 (six signals overlap to give three signals).

IR (thin film): 3055, 1490, 1412, 1317, 1225, 1140, 734, 621 cm<sup>-1</sup>

HRMS (ESI): Exact mass calculated for C<sub>30</sub>H<sub>26</sub>BrN<sub>5</sub>O<sub>2</sub><sup>+</sup> [M+H]<sup>+</sup> expected: 552.1030, found: 552.1037.

[α]<sub>D</sub><sup>25</sup> = +39.4 (c = 0.002, CH<sub>2</sub>Cl<sub>2</sub>)

**(S)-3,3'-Bis-(1-diphenylmethyl-1*H*-1,2,3-triazole-4-yl)-1,1'-biisoquinoline *N, N'*-dioxide (3c)**

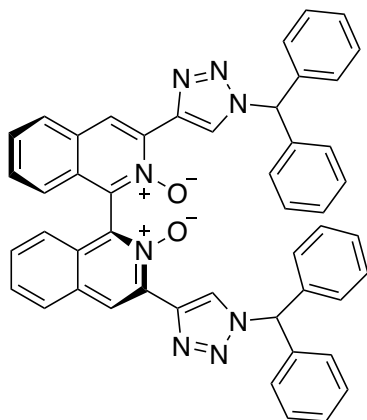

The representative procedure was followed with (*S*)-3,3'-dibromo-1,1'-biisoquinoline *N,N'*-dioxide (446 mg, 1.00 mmol) and the corresponding 4-TMS triazole (1.476 g, 4.8 mmol). The resulting crude material was purified by flash column chromatography on silica gel with 28% EtOAc in hexanes to afford the title compound as a light orange solid (234 mg, 31%).

$^1\text{H}$  NMR (400 MHz,  $\text{CDCl}_3$ )  $\delta$  9.20 (s, 2H), 8.80 (s, 2H), 8.02 (d,  $J = 8.2$  Hz, 2H), 7.58 (dd,  $J = 7.4, 7.4$  Hz, 2H), 7.41 (dd,  $J = 7.7, 7.7$  Hz, 2H), 7.34-7.20 (m, 12H), 7.19 (s, 2H), 7.13-7.11 (m, 8H), 7.01 (d,  $J = 8.4$  Hz, 2H)

$^{13}\text{C}$  NMR (100 MHz,  $\text{CDCl}_3$ )  $\delta$  139.1, 138.8, 138.4, 137.7, 137.6, 130.0, 129.1, 128.9, 128.9, 128.6, 128.5, 128.2, 128.1, 128.0, 127.9, 126.6, 123.1, 122.8, 68.5 (two signals overlap to give one signal).

IR (thin film): 3028, 1491, 1453, 1314, 1226, 1143, 749  $\text{cm}^{-1}$

HRMS (ESI): Exact mass calculated for  $\text{C}_{48}\text{H}_{35}\text{N}_8\text{O}_2^+$   $[\text{M}+\text{H}]^+$  expected: 755.2877, found: 755.2889.

$[\alpha]_{\text{D}}^{25} = +65.4$  ( $c = 0.001$ ,  $\text{CH}_2\text{Cl}_2$ )



**(S)-3-(1-Diphenylmethyl-1H-1,2,3-triazole-4-yl)-3'-bromo-1,1'-biisoquinoline N, N'-dioxide (S3)**

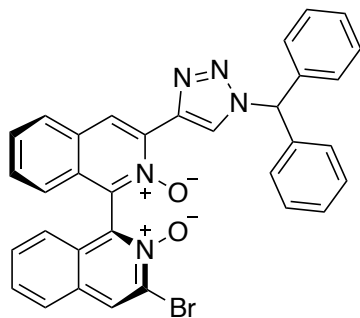

THF was degassed by bubbling nitrogen for 15 mins. (S)-3,3'-Dibromo-1,1'-biisoquinoline N, N'-dioxide (50 mg, 0.112 mmol), the corresponding 4-TMS triazole (165 mg, 0.537 mmol), PdCl<sub>2</sub>(dppp) (27 mg, 0.046 mmol), and silver(II) oxide (125 g, 1.0 mmol) were charged in a flame-dried round bottom flask with a stir egg. The reaction flask was covered with foil and vacuumed and back-filled with argon five times. THF (4 mL, 0.025M) was added, followed by a solution of TBAF·3H<sub>2</sub>O (170 mg, 0.539 mmol) in THF (0.5 mL, 1M). The reaction was stirred at 40 °C for 2 hours. The reaction was cooled to room temperature then poured into 50 mL of saturated NaHCO<sub>3</sub> solution and stirred for 15 mins. The reaction was then filtered through celite, extracted with CH<sub>2</sub>Cl<sub>2</sub> (50 mL x2), dried over Na<sub>2</sub>SO<sub>4</sub>, filtered, and concentrated *in vacuo*. The resulting crude was purified by flash column chromatography on silica gel with 45% EtOAc in hexanes to afford the title compound as a pale pink solid (27 mg, 40%). When Hiyama representative procedure is used, this compound remains only in trace quantities (*vide supra*).

<sup>1</sup>H NMR (400 MHz, CDCl<sub>3</sub>) δ 9.19 (s, 1H), 8.79 (s, 1H), 8.33 (s, 1H), 8.03 (d, *J* = 8.2 Hz, 1H), 7.83 (d, *J* = 8.2 Hz, 1H), 7.65-7.52 (m, 2H), 7.49-7.38 (m, 2H), 7.34-7.30 (m, 6H), 7.20 (s, 1H), 7.16-7.11 (m, 4H), 7.07 (d, *J* = 8.4 Hz, 1H), 7.01 (d, *J* = 8.4 Hz, 1H)

$^{13}\text{C}$  NMR (100 MHz,  $\text{CDCl}_3$ )  $\delta$  139.1, 138.9, 138.8, 137.9, 137.7, 137.6, 131.2, 130.3, 129.9, 129.1, 129.0, 128.9, 128.8, 128.6, 128.6, 128.3, 128.1, 127.9, 127.9, 126.6, 126.4, 123.4, 123.0, 122.9, 68.5

IR (thin film): 3059, 1490, 1455, 1317, 1234, 1139, 735, 702  $\text{cm}^{-1}$

HRMS (ESI): Exact mass calculated for  $\text{C}_{33}\text{H}_{23}\text{BrN}_5\text{O}_2^+$   $[\text{M}+\text{H}]^+$  expected: 600.1030, found: 600.1039.

$[\alpha]_{\text{D}}^{25} = +24.0$  ( $c = 0.001$ ,  $\text{CH}_2\text{Cl}_2$ )

**(S)-3,3'-Bis-[1-(1-adamantyl)-1H-1,2,3-triazole-4-yl]-1,1'-biisoquinoline N, N'-dioxide (3d)** and **(S)-3-[1-(1-adamantyl)-1H-1,2,3-triazole-4-yl]-3'-bromo-1,1'-biisoquinoline N, N'-dioxide (S4)**

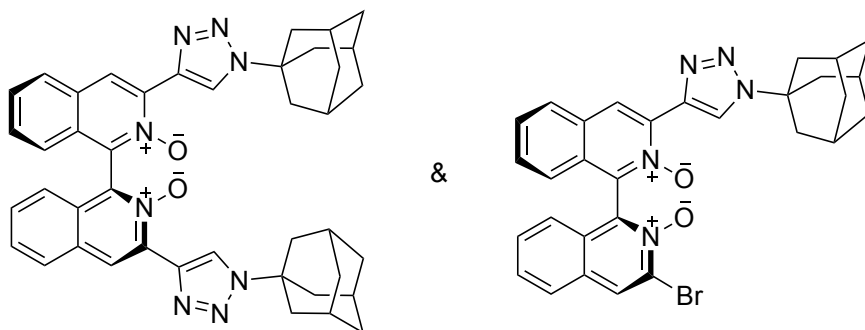

The representative procedure was followed with (S)-3,3'-dibromo-1,1'-biisoquinoline N, N'-dioxide (446 mg, 1.00 mmol) and the corresponding 4-TMS triazole (1.322 g, 4.8 mmol). The resulting crude material was purified by flash column chromatography on silica gel with 32% EtOAc in hexanes to afford **3d** compound as off-white solid (162 mg, 23%), and then with 45% EtOAc in hexanes to afford **S4** as off-white solid (106 mg, 19%).

**(S)-3,3'-Bis-[1-(1-adamantyl)-1H-1,2,3-triazole-4-yl]-1,1'-biisoquinoline N, N'-dioxide (3d)**

<sup>1</sup>H NMR (400 MHz, CDCl<sub>3</sub>) δ 9.19 (s, 2H), 9.02 (s, 2H), 8.05 (d, *J* = 8.2 Hz, 2H), 7.60 (dd, *J* = 7.5, 7.5 Hz, 2H), 7.43 (dd, *J* = 7.5, 7.5 Hz, 2H), 7.07 (d, *J* = 8.5 Hz, 2H), 2.26 (br s, 6H), 2.24 (br s, 3H), 1.80-1.72 (br m, 6H)

<sup>13</sup>C NMR (100 MHz, CDCl<sub>3</sub>) δ 139.5, 138.6, 138.1, 129.8, 129.2, 128.9, 127.9, 127.9, 123.7, 123.2, 122.4, 60.0, 42.9, 35.9, 29.5

IR (thin film): 2905, 2850, 1452, 1417, 1311, 1223, 1208, 1073, 748 cm<sup>-1</sup>

HRMS (ESI): Exact mass calculated for C<sub>42</sub>H<sub>43</sub>N<sub>8</sub>O<sub>2</sub><sup>+</sup> [M+H]<sup>+</sup> expected: 691.3503, found: 691.3515.

[α]<sub>D</sub><sup>25</sup> = +68.24 (c = 0.0025, CH<sub>2</sub>Cl<sub>2</sub>)

**(S)-3-[1-(1-Adamantyl)-1H-1,2,3-triazole-4-yl]-3'-bromo-1,1'-biisoquinoline N, N'-dioxide (S4)**

<sup>1</sup>H NMR (400 MHz, CDCl<sub>3</sub>) δ 9.15 (s, 1H), 8.98 (s, 1H), 8.36 (s, 1H), 8.03 (d, *J* = 8.2 Hz, 1H), 7.85 (d, *J* = 8.2 Hz, 1H), 7.62-7.56 (m, 2H), 7.48-7.41 (m, 2H), 7.11-7.04 (m, 2H), 2.27 (br s, 6H), 2.25 (br s, 3H), 1.81-1.73 (br m, 6H)

<sup>13</sup>C NMR (100 MHz, CDCl<sub>3</sub>) δ 139.4, 139.1, 138.0, 138.0, 131.2, 130.2, 129.7, 129.1, 129.1, 128.9, 128.8, 128.7, 127.8, 127.8, 126.4, 123.6, 123.5, 123.0, 122.5, 60.0, 42.9, 35.9, 29.5 (two signals overlap to give one signal).

IR (thin film): 2913, 2850, 1453, 1420, 1314, 1222, 1138, 749, 625 cm<sup>-1</sup>

HRMS (ESI): Exact mass calculated for C<sub>30</sub>H<sub>27</sub>BrN<sub>5</sub>O<sub>2</sub><sup>+</sup> [M+H]<sup>+</sup> expected: 568.1343, found: 568.1345

[α]<sub>D</sub><sup>25</sup> = +37.1 (c = 0.001, CH<sub>2</sub>Cl<sub>2</sub>)

**(S)-N-[1-(Phenyl)-ethyl]aniline (8):**

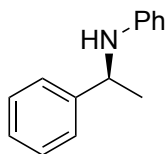

**Representative Procedure for the Reduction of *N*-(1-Phenylethylidene)benzene-amine (7):** Ketimine **7** was synthesized according to the literature procedure.<sup>[15]</sup> In a flame-dried test tube with stir egg, the ketimine (49 mg, 0.25 mmol) and catalyst **3c** (19 mg, 0.025 mmol) were dissolved in 1 mL of a 3:1 mixture of MeCN:CH<sub>2</sub>Cl<sub>2</sub> and cooled to -50 °C. A solution of trichlorosilane in CH<sub>2</sub>Cl<sub>2</sub> (131 μL, 2.86 M) was slowly added to the reaction mixture at -50 °C. The reaction was warmed to -40 °C and stirred 16 hours at that temperature. The reaction was poured into 5 mL of saturated NaHCO<sub>3</sub> solution cooled to 0°C and stirred for 20 min. at rt. It was then filtered through celite and extracted twice with 2 mL of CH<sub>2</sub>Cl<sub>2</sub>. The combined organic layers were dried over Na<sub>2</sub>SO<sub>4</sub>, filtered, and condensed *in vacuo*. <sup>1</sup>H NMR yield was determined using 0.5 mmol of 1,1,2,2-tetrachloroethane as an internal standard. A fraction of the crude reaction mixture was purified by prep TLC for characterization purposes. All spectral data were consistent with the literature values.<sup>[16]</sup>

<sup>1</sup>H NMR (400 MHz, CDCl<sub>3</sub>) δ 7.37 (d, *J* = 7.6 Hz, 2H), 7.32 (dd, *J* = 7.2, 8.0 Hz, 2H), 7.22 (t, *J* = 7.2 Hz, 1H), 7.09 (dd, *J* = 7.6, 7.6 Hz, 2H), 6.64 (t, *J* = 7.6 Hz, 1H), 6.51 (d, *J* = 7.6 Hz, 2H), 4.48 (q, *J* = 6.8 Hz, 1H), 4.03 (br, 1H), 1.52 (d, *J* = 6.8 Hz, 3H)  
ee = 56 %; [α]<sub>D</sub><sup>20</sup> = +16.0 (c = 0.001, CH<sub>2</sub>Cl<sub>2</sub>); The enantiomeric excess and the absolute stereochemistry were determined by HPLC analysis:<sup>[16]</sup> *t*<sub>R</sub> (major) 17.85 min; *t*<sub>R</sub>

(minor) 21.67 min, (Daicel Chiralcel® OD-H with an OD-H guard column, hexane/2-propanol = 98:2, 0.5mL/min).

**(R)-1-Phenylethanaminium Chloride (S5):**

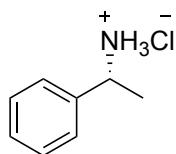

**Representative Procedure for the Reduction of 1-Phenylethanaminium Chloride**

**(9):** Ketimine salt **9** was synthesized according to literature procedure.<sup>[17]</sup> A flame-dried Schlenk tube was charged with the ketimine salt (156 mg, 1.0 mmol) and a stir bar in a dry box, then taken out of a dry box. To this, catalyst **3a** (60 mg, 0.1 mmol) and freshly distilled CH<sub>2</sub>Cl<sub>2</sub> (4 mL, 0.25 M) were added under nitrogen atmosphere. The resulting suspension was cooled to -60 °C with stirring, and then treated with a solution of trichlorosilane in CH<sub>2</sub>Cl<sub>2</sub> (528 µL, 2.86 M). The reaction mixture was stirred at -40 °C for 16 hours. The reaction was quenched with 4 mL of 3N NaOH and stirred for 20 min, making sure that the pH of the aqueous layer was ≥12. The aqueous layer was extracted 5 times with 2 mL CH<sub>2</sub>Cl<sub>2</sub>. The organic layers were combined and dried over Na<sub>2</sub>SO<sub>4</sub>, filtered, and condensed *in vacuo* to give 1-phenyl-*N*-(1-phenylethylidene)-ethanamine.<sup>[18]</sup> The amount of 1-phenyl-*N*-(1-phenylethylidene)-ethanamine in the crude reaction mixture was determined by <sup>1</sup>H NMR using 0.5 mmol 1,1,2,2-tetrachloroethane as an internal standard (23% NMR yield). 1-Phenyl-*N*-(1-phenylethylidene)-ethanamine in the crude reaction mixture was hydrolyzed on silica during the flash column chromatography (100% CH<sub>2</sub>Cl<sub>2</sub> to 5% methanol in CH<sub>2</sub>Cl<sub>2</sub>) to afford phenylethylamine. To prevent product loss, 500 µL of 1 M HCl in ether were added before being

condensed *in vacuo* (1.0 mmHg), affording the title compound as a white solid (32 mg, 20% yield). All spectral data were consistent with the reported values.<sup>[17]</sup>

<sup>1</sup>H NMR (400 MHz, CDCl<sub>3</sub>) 8.71 (br s, 3H), 7.48-7.34 (m, 5H), 4.36 (d, *J* = 8.0 Hz, 1H), 1.66 (d, *J* = 4.0 Hz, 3H).

**(*R*)-*N*-(1-Phenylethyl)benzamide (S6):**

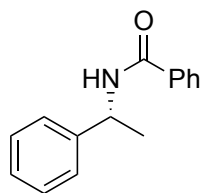

**Procedure for the Benzoylation of 1-Phenylethanaminium Chloride: (*R*)-1-**

Phenylethanaminium chloride was converted to the title compound according to the literature procedure<sup>[19]</sup> for HPLC analysis. A solution of triethylamine in THF (115  $\mu$ L, 0.6 M) was added to (*R*)-1-phenylethanaminium chloride (6 mg, 0.04 mmol). To this, a solution of benzoyl chloride in THF (115  $\mu$ L, 0.4 M) was added and the resulting reaction mixture was stirred 1 hour at rt. The reaction was quenched with 4 mL of saturated NH<sub>4</sub>Cl solution and extracted with 2 mL of CH<sub>2</sub>Cl<sub>2</sub>. A fraction of the crude reaction mixture was purified by prep TLC for characterization purposes. All spectral data were consistent with the literature values.<sup>[20]</sup>

<sup>1</sup>H NMR (400 MHz, CDCl<sub>3</sub>) 7.78-7.76 (m, 2H), 7.52-7.48 (m, 1H), 7.45-7.35 (m, 6H), 7.30-7.25 (m, 1H), 6.32 (br s, 1H), 5.34 (q, *J* = 7.2 Hz), 1.62 (d, *J* = 7.2 Hz, 3H).

ee = 54 %; [ $\alpha$ ]<sub>D</sub><sup>20</sup> = +4.8 (c = 0.001, CH<sub>2</sub>Cl<sub>2</sub>); The enantiomeric excess and the absolute stereochemistry were determined by HPLC analysis:<sup>[20]</sup> *t*<sub>R</sub> (major) 27.53 min;

(minor) 39.36 min, (Daicel Chiralcel<sup>®</sup> OD-H with an OD-H guard column, hexane/2-propanol = 90:10, 0.5mL/min).

### 3. Computational Procedures.

All calculations reported here were performed with DFT methods, using the Q-Chem 4 quantum chemistry code.<sup>[21]</sup> These preliminary optimizations were all conducted using the PBEh-3c composite procedure,<sup>[22]</sup> with solvent effects included using the C-PCM method with the dielectric constant of CH<sub>2</sub>Cl<sub>2</sub> ( $\epsilon = 9.08$ ).<sup>[23]</sup> Several geometry optimization calculations have been performed for each isomer to locate its minima on the potential energy surface. Molecular symmetry has been turned off for these calculations due to the necessity of the C-PCM method. As such, the C<sub>2</sub> symmetry expected from the X-Ray data is not completely verified in the optimized structures, but respected approximately. The initial structures for the geometry optimizations have been obtained via a molecular mechanics based conformational search algorithm, developed in-house. Given the fact that the molecules in this project and the nature of their interaction are well within the limits of recent validation studies of the method that we used, we expect geometries to be converged within 0.05 Å accuracy,<sup>[24]</sup> and energies to be converged within 2 kcal/mol accuracy.<sup>[25]</sup> The structures of the minima for the complex and the free Lewis bases are also provided in cartesian coordinates (xyz) as additional supplementary text files.

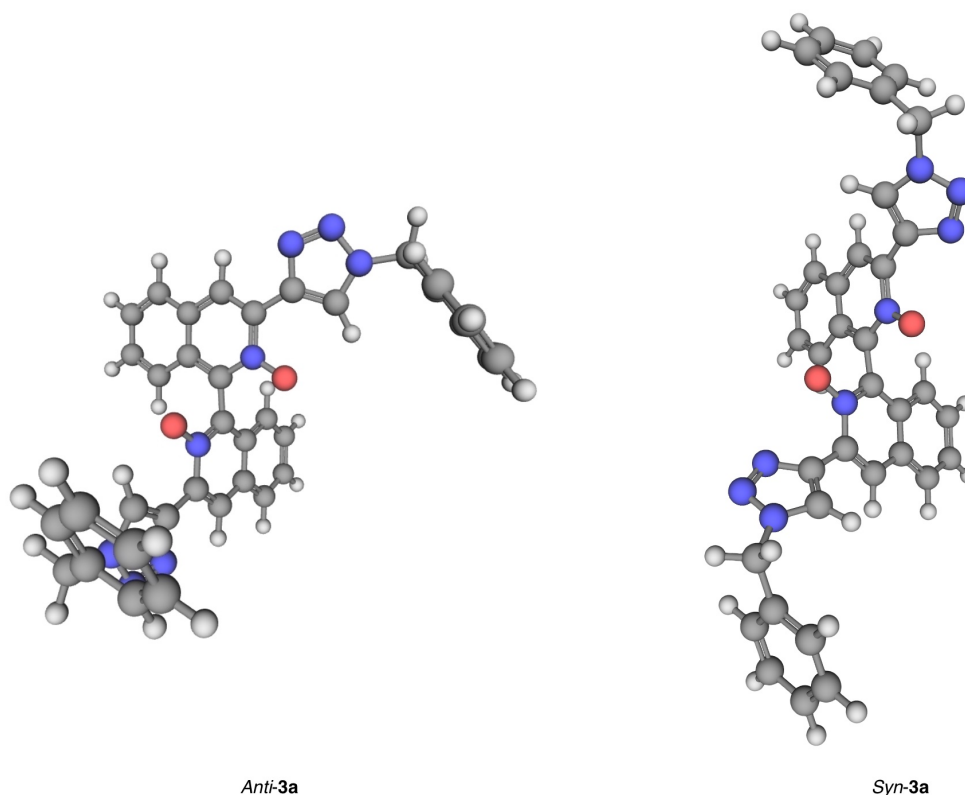

**Figure S1.** *Anti-3a* and *Syn-3a*. 3-Dimensional structures of the free Lewis base (**3a**) calculated with PBEh-3c/PCM(DCM).

#### 4. Crystallographic Experimental Section.

##### Representative Procedure for Crystallographic Analysis:

##### **3,3'-Bis-(1-benzyl-1*H*-1,2,3-triazole-4-yl)-1,1'-biisoquinoline *N, N'*-dioxide (**3a**)**

The data crystal of **3a** was glued onto the end of a thin glass fiber. X-ray intensity data were measured with a Bruker SMART APEX2 CCD-based diffractometer using Mo K $\alpha$  radiation ( $\lambda = 0.71073 \text{ \AA}$ ).<sup>[26]</sup> The raw data frames were integrated with the SAINT+ program by using a narrow-frame integration algorithm.<sup>[26]</sup> Corrections for Lorentz and polarization effects were also applied with SAINT+. An empirical absorption correction



based on the multiple measurement of equivalent reflections was applied using the program SADABS. The structure was solved by a combination of direct methods and difference Fourier syntheses, and refined by full-matrix least-squares on  $F^2$ , by using the SHELXTL software package.<sup>[27]</sup> All non-hydrogen atoms were refined with anisotropic displacement parameters unless otherwise stated. Hydrogen atoms were placed in geometrically idealized positions and included as standard riding atoms during the least-squares refinements. Crystal data, data collection parameters, and results of the analyses are listed in Table S1.

Yellow single crystals of **3a** suitable for x-ray diffraction analyses obtained by slow diffusion of Et<sub>2</sub>O into a solution of **3a** in CH<sub>2</sub>Cl<sub>2</sub> crystallized in the orthorhombic crystal system. The systematic absences in the intensity data were consistent with the unique space group *Fdd2*. With  $Z = 8$ , the molecule has crystallographic 2-fold symmetry.

**Table S1. Crystallographic Data for 3,3'-Bis-(1-benzyl-1*H*-1,2,3-triazole-4-yl)-1,1'-biisoquinoline *N, N'*-dioxide (3a)**

| <b>3a</b>                                                             |                                                               |
|-----------------------------------------------------------------------|---------------------------------------------------------------|
| Empirical formula                                                     | C <sub>36</sub> H <sub>26</sub> N <sub>8</sub> O <sub>2</sub> |
| Formula weight                                                        | 602.65                                                        |
| Crystal system                                                        | Orthorhombic                                                  |
| Lattice parameters                                                    |                                                               |
| <i>a</i> (Å)                                                          | 13.0942(5)                                                    |
| <i>b</i> (Å)                                                          | 36.6120(14)                                                   |
| <i>c</i> (Å)                                                          | 12.3660(5)                                                    |
| $\alpha$ (°)                                                          | 90                                                            |
| $\beta$ (°)                                                           | 90                                                            |
| $\gamma$ (°)                                                          | 90                                                            |
| <i>V</i> (Å <sup>3</sup> )                                            | 5928.3(4)                                                     |
| Space group                                                           | <i>Fdd</i> 2 (# 43)                                           |
| Z value                                                               | 8                                                             |
| $\rho_{\text{calc}}$ (g / cm <sup>3</sup> )                           | 1.350                                                         |
| $\mu$ (Mo K $\alpha$ ) (mm <sup>-1</sup> )                            | 0.088                                                         |
| Temperature (K)                                                       | 273                                                           |
| 2 $\Theta_{\text{max}}$ (°)                                           | 58.0                                                          |
| No. Obs. ( <i>I</i> > 2 $\sigma$ ( <i>I</i> ))                        | 3785                                                          |
| No. Parameters                                                        | 208                                                           |
| Goodness of fit                                                       | 1.047                                                         |
| Max. shift in cycle                                                   | 0.000                                                         |
| Residuals*:R1; wR2                                                    | 0.0387; 0.1028                                                |
| Absorption Correction,<br>Max/min                                     | Multi-scan<br>0.7013/0.7466                                   |
| Largest peak in Final Diff. Map (e <sup>-</sup> /<br>Å <sup>3</sup> ) | 0.299                                                         |

$$*R = \frac{\sum_{hkl} (| | F_{\text{obs}} | - | F_{\text{calc}} | | )}{\sum_{hkl} | F_{\text{obs}} |}; R_w = \frac{[\sum_{hkl} w (| | F_{\text{obs}} | - | F_{\text{calc}} | | )^2 / \sum_{hkl} w F_{\text{obs}}^2]^{1/2}}{w = 1/\sigma^2(F_{\text{obs}}); \text{GOF} = [\sum_{hkl} w (| | F_{\text{obs}} | - | F_{\text{calc}} | | )^2 / (n_{\text{data}} - n_{\text{vari}})]^{1/2}}.$$

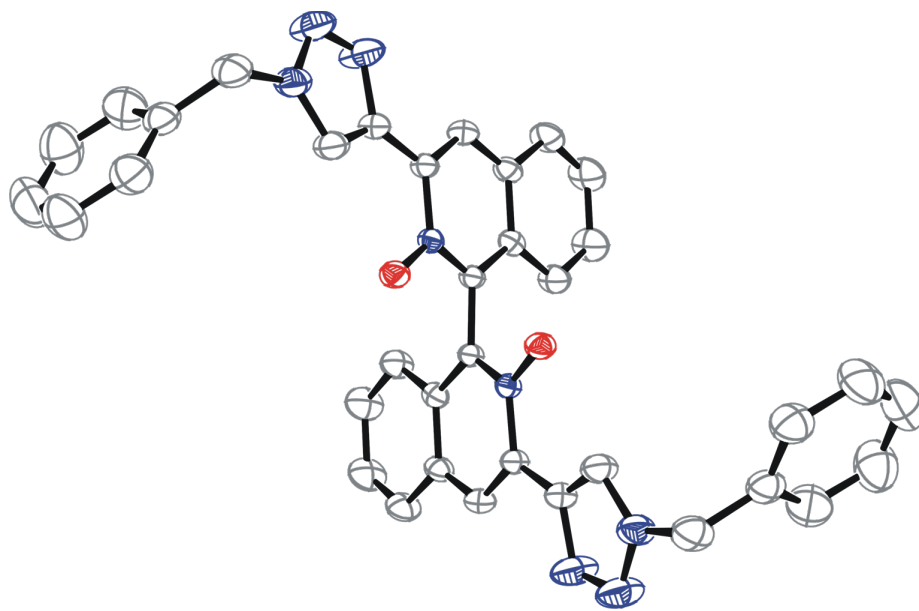

**Figure S2.** An ORTEP of the molecular structure of 3,3'-Bis-(1-benzyl-1*H*-1,2,3-triazole-4-yl)-1,1'-biisoquinoline *N, N'*-dioxide (**3a**) showing 40 % thermal ellipsoid probability.

### **1-(1-Adamantyl)-4-(trimethylsilyl)-1*H*-1,2,3-triazole (6d)**

CuAAC of trimethylsilylacetylene with aryl or alkyl azides are generally thought to be exclusively regioselective, providing 1-aryl- (or alkyl)-4-TMS-1*H*-1,2,3-triazoles but not its 1,5-regioisomer. However, in many studies in the literature, 1,4-isomers are simply assigned using the assumption that trimethylsilylacetylene lead to 1,4-isomers under Cu catalysis. As such, we thought it would be prudent to secure the structure of the second example of the triazoles used in this study as provided below.

The representative procedure for crystallographic analysis was followed. Crystal data, data collection parameters, and results of the analyses are listed in Table S2. Colorless single crystals of **6d** suitable for x-ray diffraction analyses crystallized in the monoclinic crystal system by cooling a solution of **6d** in a 1:1 mixture of CH<sub>2</sub>Cl<sub>2</sub> and toluene in the

freezer (ca.  $-20\text{ }^{\circ}\text{C}$ ). The systematic absences in the intensity data were consistent with the space groups *Cc* and *C2/c*. The latter was chosen and confirmed by the successful refinement of the structure.

**Table S2. Crystallographic Data for 1-(1-adamantyl)-4-(trimethylsilyl)-1*H*-1,2,3-triazole (6d)**

|                                                                       | <b>6d</b>                                         |
|-----------------------------------------------------------------------|---------------------------------------------------|
| Empirical formula                                                     | C <sub>15</sub> H <sub>25</sub> N <sub>3</sub> Si |
| Formula weight                                                        | 275.47                                            |
| Crystal system                                                        | Monoclinic                                        |
| Lattice parameters                                                    |                                                   |
| <i>a</i> (Å)                                                          | 21.221(2)                                         |
| <i>b</i> (Å)                                                          | 13.6917(15)                                       |
| <i>c</i> (Å)                                                          | 11.2089(12)                                       |
| $\beta$ (°)                                                           | 106.723(1)                                        |
| <i>V</i> (Å <sup>3</sup> )                                            | 3119.0(6)                                         |
| Space group                                                           | <i>C2/c</i> (# 15)                                |
| <i>Z</i> value                                                        | 8                                                 |
| $\rho_{\text{calc}}$ (g / cm <sup>3</sup> )                           | 1.173                                             |
| $\mu$ (Mo K $\alpha$ ) (mm <sup>-1</sup> )                            | 0.143                                             |
| Temperature (K)                                                       | 273                                               |
| 2 $\Theta_{\text{max}}$ (°)                                           | 51.0                                              |
| No. Obs. ( <i>I</i> > 2 $\sigma$ ( <i>I</i> ))                        | 2353                                              |
| No. Parameters                                                        | 175                                               |
| Goodness of fit                                                       | 1.041                                             |
| Max. shift in cycle                                                   | 0.001                                             |
| Residuals*:R1; wR2                                                    | 0.0394; 0.1035                                    |
| Absorption Correction,<br>Max/min                                     | Multi-scan<br>0.7457/0.6170                       |
| Largest peak in Final Diff. Map (e <sup>-</sup> /<br>Å <sup>3</sup> ) | 0.329                                             |

\* $R = \sum_{hkl} (| | F_{\text{obs}} | - | F_{\text{calc}} | | ) / \sum_{hkl} | F_{\text{obs}} |$ ;  $R_w = [ \sum_{hkl} w ( | F_{\text{obs}} | - | F_{\text{calc}} | )^2 / \sum_{hkl} w F_{\text{obs}}^2 ]^{1/2}$ ,  
 $w = 1 / \sigma^2(F_{\text{obs}})$ ;  $\text{GOF} = [ \sum_{hkl} w ( | F_{\text{obs}} | - | F_{\text{calc}} | )^2 / (n_{\text{data}} - n_{\text{vari}}) ]^{1/2}$ .

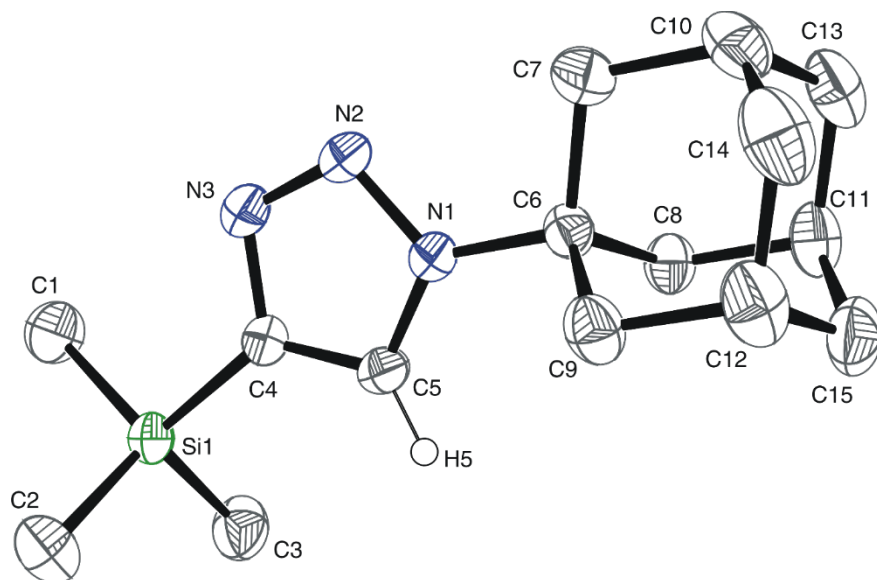

**Figure S3.** An ORTEP of the molecular structure of 1-(1-adamantyl)-4-(trimethylsilyl)-1H-1,2,3-triazole (**6d**) showing 40 % thermal ellipsoid probability.

## 5. References:

- [1] Still, W. C.; Kahn, M.; Mitra A. *J. Org. Chem.* **1978**, *43*, 2923-2925.
- [2] Ishihara, K.; Kobayashi, J.; Nakano, K.; Ishibashi, H.; Yamamoto, H. *Chirality* **2003**, *15*, 135-138.
- [3] Reep, C.; Morgante, P.; Peverati, R.; Takenaka, N. *Org. Lett.* **2018**, *20*, 5757-5761.
- [4] (a) Friary, R.; Seidl, V. *J. Org. Chem.* **1986**, *51(16)*, 3214-3215. (b) Kwok, S. W.; Fotsing, J. R.; Fraser, R. J.; Rodionov, V. O.; Fokin, V. V. *Org. Lett.* **2010**, *12(19)*, 4217-4219. (c) Alvarez, S. G.; Alvarez, M. T. *Synthesis* **1997**, *1997(4)*, 413-414. (d) Pearce, A. J.; See, X. Y.; Tonks, I. A. *Chem. Commun.* **2018**, *54*, 6891-6894.
- [5] Jeong, Y.; Ryu, J.; *J. Org. Chem.* **2010**, *75*, 4183-4191.
- [6] Tornøe, C. W.; Christensen, C.; Meldal, M. *J. Org. Chem.* **2002**, *67*, 3057-3064.

- [7] (a) Denmark, S. E.; Ambrosi, A. *Org. Process Res. Dev.* **2015**, *19*, 982-994.; (b) Nakao, Y.; Hiyama, T. *Chem. Soc. Rev.* **2011**, *40*, 4893-4901.
- [8] Rasolofonjatovo, E.; Theeramunkong, S.; Bouriaud, A.; Kolodych, S.; Chaumontet, M.; Taran, F. *Org. Lett.* **2013**, *15*, 4698-4701.
- [9] Panja, C.; Puttaramu, J. V.; Chandran, T. K.; Nimje, R. Y.; Kumar, H.; Gupta, A.; Arunachalam, P. N.; Corte, J. R.; Mathur, A. *Journal of Fluorine Chemistry*, **2020**, *236*, 109516.
- [10] (a) Krasniški, A.; Fokin, V. V.; Sharpless, K. B. *Org. Lett.* **2004**, *6*, 1237-1240.; (b) Meza-Aviña, M. E.; Patel, M. K.; Lee, C. B.; Dietz, T. J., Croatt, M. P. *Org. Lett.* **2011**, *13*, 2984-2987.
- [11] (a) Ohta, S.; Kawasaki, I.; Uemura, T.; Yamashita, M.; Yoshioka, T.; Yamaguchi, S. *Chem. Pharm. Bull.* **1997**, *45*, 1140-1145.; (b) Uhlmann, P.; Felding, J.; Vedsø, P.; Begtrup, M. *J. Org. Chem.* **1997**, *62*, 9177-9181.
- [12] Kim, D.W.; Jeong, H.; Lim, S. T.; Sohn, M. *Angew. Chem. Int. Ed.* **2008**, *47*, 8404-8406
- [13] Mason, M. R.; Verkade, J. G. *Organometallics* **1992**, *11*, 2212-2220.
- [14] Kuniyasu, H.; Yoshizawa, T.; Kambe, N. *Tetrahedron Lett.* **2010**, *51*, 6818-6821.
- [15] Schnider, P.; Koch, G.; Pretot, R.; Wang, G.; Bohnen, F. M.; Kruger, C.; Pfaltz, A. *Chem. Eur. J.* **1997**, *3*, 887-892.
- [16] Zhu, C.; Akiyama, T. *Org. Lett.* **2009**, *11*, 4180-4183.
- [17] (a) Zhao, Q.; Wen, J.; Tan, R.; Huang, K.; Metola, P.; Wang, R.; Anslyn, E. V.; Zhang, X. *Angew. Chem. Int. Ed.* **2014**, *53*, 8468-8470. (b) Hou, G.; Gosselin, F.; Li, W.;

McWilliams, J. C.; Sun, Y.; Weisel, M.; O'Shen, P. D.; Chen, C.; Davies, I. R.; Zhang, X. *J. Am. Chem. Soc.* **2009**, *131*, 9882-9883.

[18] Qin, Y.; Zhang, L.; Lv, J.; Luo, S.; Cheng, J. *Org. Lett.* **2015**, *17*, 1469-1472.

[19] Nakamura, T.; Tateishi, K.; Tsukagoshi, S.; Hashimoto, S.; Watanabe, S.; Soloshonok, V. A.; Acena, J. L.; Kitagawa, O. *Tetrahedron* **2012**, *68*, 4013-4017.

[20] De, C. K.; Klauber, E. G.; Seidel, D. *J. Am. Chem. Soc.* **2009**, *131*, 17060-17061.

[21] Shao, Y. *et al. Mol. Phys.* **2015**, *113*, 184-215.

[22] Grimme, S.; Brandenburg, G.; Bannwarth, C.; Hansen A. *J. Chem. Phys.* **2015**, *143*, 054107.

[23] (a) Barone, V.; Cossi, M. *J. Phys. Chem. A* **1998**, *102*, 1995-2001; (b) Truong, T. N.; Stefanovich, E. V. *Chem. Phys. Lett.*, **1995**, *240*, 253-260.

[24] Morgante, P.; Peverati, R. *Chem. Phys. Lett.*, **2021**, *765*, 138281.

[25] Morgante, P.; Peverati, R. *Phys. Chem. Chem. Phys. Lett.*, **2019**, *21*, 19092-19103.

[26] Apex2 Version 2.2-0 and SAINT+ Version 7.46A; Bruker Analytical X-ray System, Inc., Madison, Wisconsin, USA, 2007.

[27] (a) G. M. Sheldrick, SHELXTL Version 6.1; Bruker Analytical X-ray Systems, Inc., Madison, Wisconsin, USA, 2000. (b) G. M. Sheldrick, *Acta. Crystallogr. C* **71** (2015) 3-8.



BIQNO-I

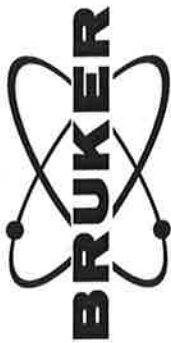

NAME Aug23-2019

EXPNO 9

PROCNO 1

Date\_ 20190823

Time 17.43

INSTRUM spect

PROBHD 5 mm TBI 1H/31

PULPROG zg30

TD 65536

SOLVENT CDC13

NS 16

DS 2

SWH 8278.146 Hz

FIDRES 0.126314 Hz

AQ 3.9584243 sec

RG 1149.4

DW 60.400 usec

DE 6.50 usec

TE 300.0 K

DI 1.0000000 sec

TD0 1

S33

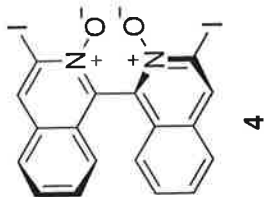

8.564  
7.807  
7.787  
7.588  
7.586  
7.571  
7.568  
7.550  
7.548  
7.482  
7.479  
7.464  
7.461  
7.458  
7.443  
7.440  
7.262  
7.062  
7.041

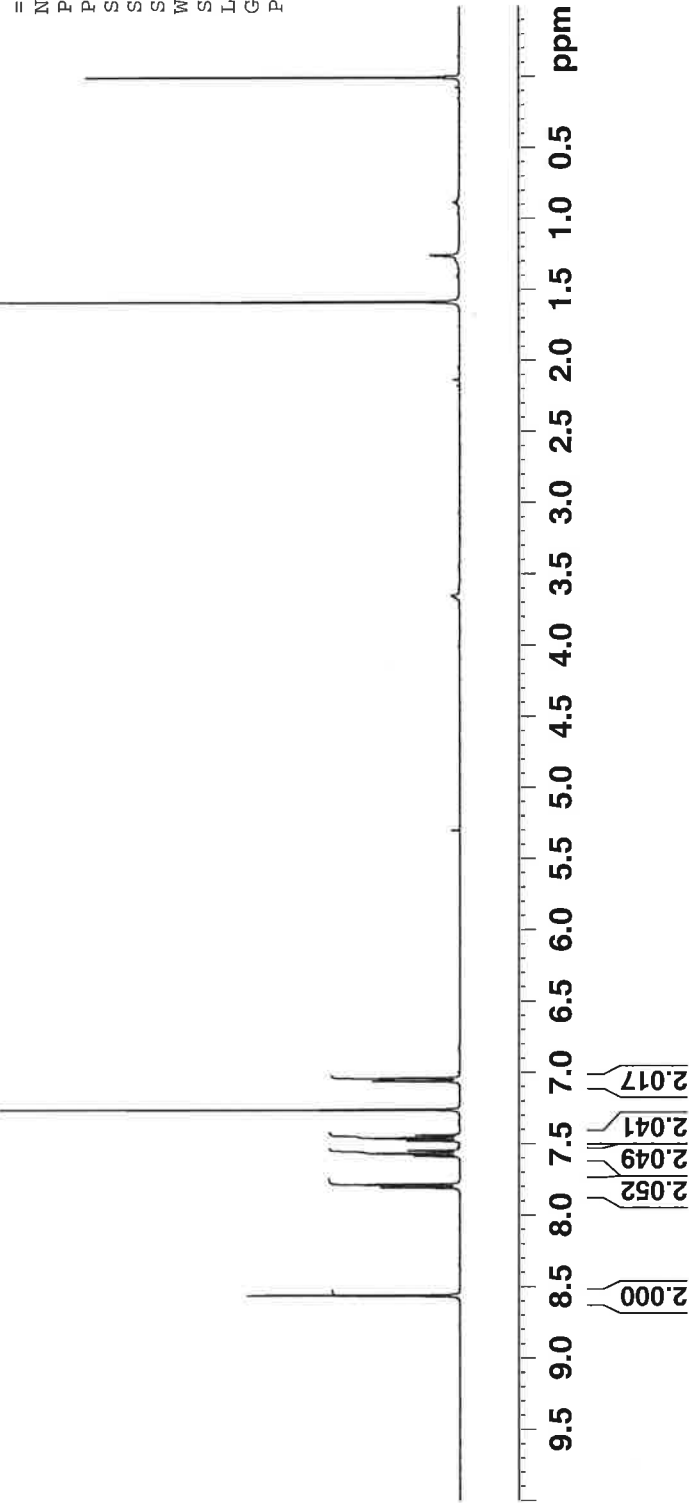

==== CHANNEL f1 =====  
 NUC1 1H  
 P1 11.75 usec  
 PL1 3.00 dB  
 SF01 400.1324710 MHz  
 SI 32768  
 SF 400.1300087 MHz  
 WDW EM  
 SSB 0  
 LB 0.30 Hz  
 GB 0  
 PC 1.00

S-BIQNO-I

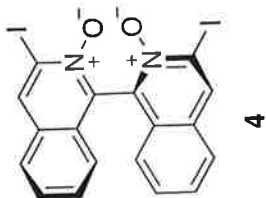

4

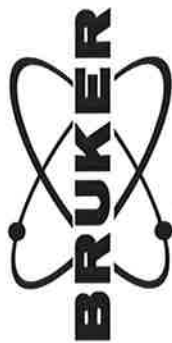

Aug23-2019  
 NAME Aug23-2019  
 EXPNO 11  
 PROCNO 1  
 Date\_ 20190824  
 Time\_ 8.48  
 INSTRUM spect  
 PROBHD 5 mm TBI 1H/31  
 PULPROG zgpg30  
 TD 65536  
 SOLVENT CDCl3  
 NS 10000  
 DS 4  
 SWH 23980.814 Hz  
 FIDRES 0.365918 Hz  
 AQ 1.3664756 sec  
 RG 7298.2  
 DW 20.850 usec  
 DE 6.50 usec  
 TE 300.0 K  
 D1 2.00000000 sec  
 D11 0.03000000 sec  
 TD0 1

==== CHANNEL f1 =====  
 NUC1 13C  
 P1 21.00 usec  
 PL1 -4.00 dB  
 SFO1 100.6228298 MHz

==== CHANNEL f2 =====  
 CPDPRG2 waltz16  
 NUC2 1H  
 PCPD2 80.00 usec  
 PL2 -2.00 dB  
 PL12 14.49 dB  
 PL13 14.49 dB  
 SFO2 400.1316005 MHz  
 SI 32768  
 SF 100.6127702 MHz  
 WDW EM  
 SSB 0  
 LB 1.00 Hz  
 GB 0  
 PC 1.40

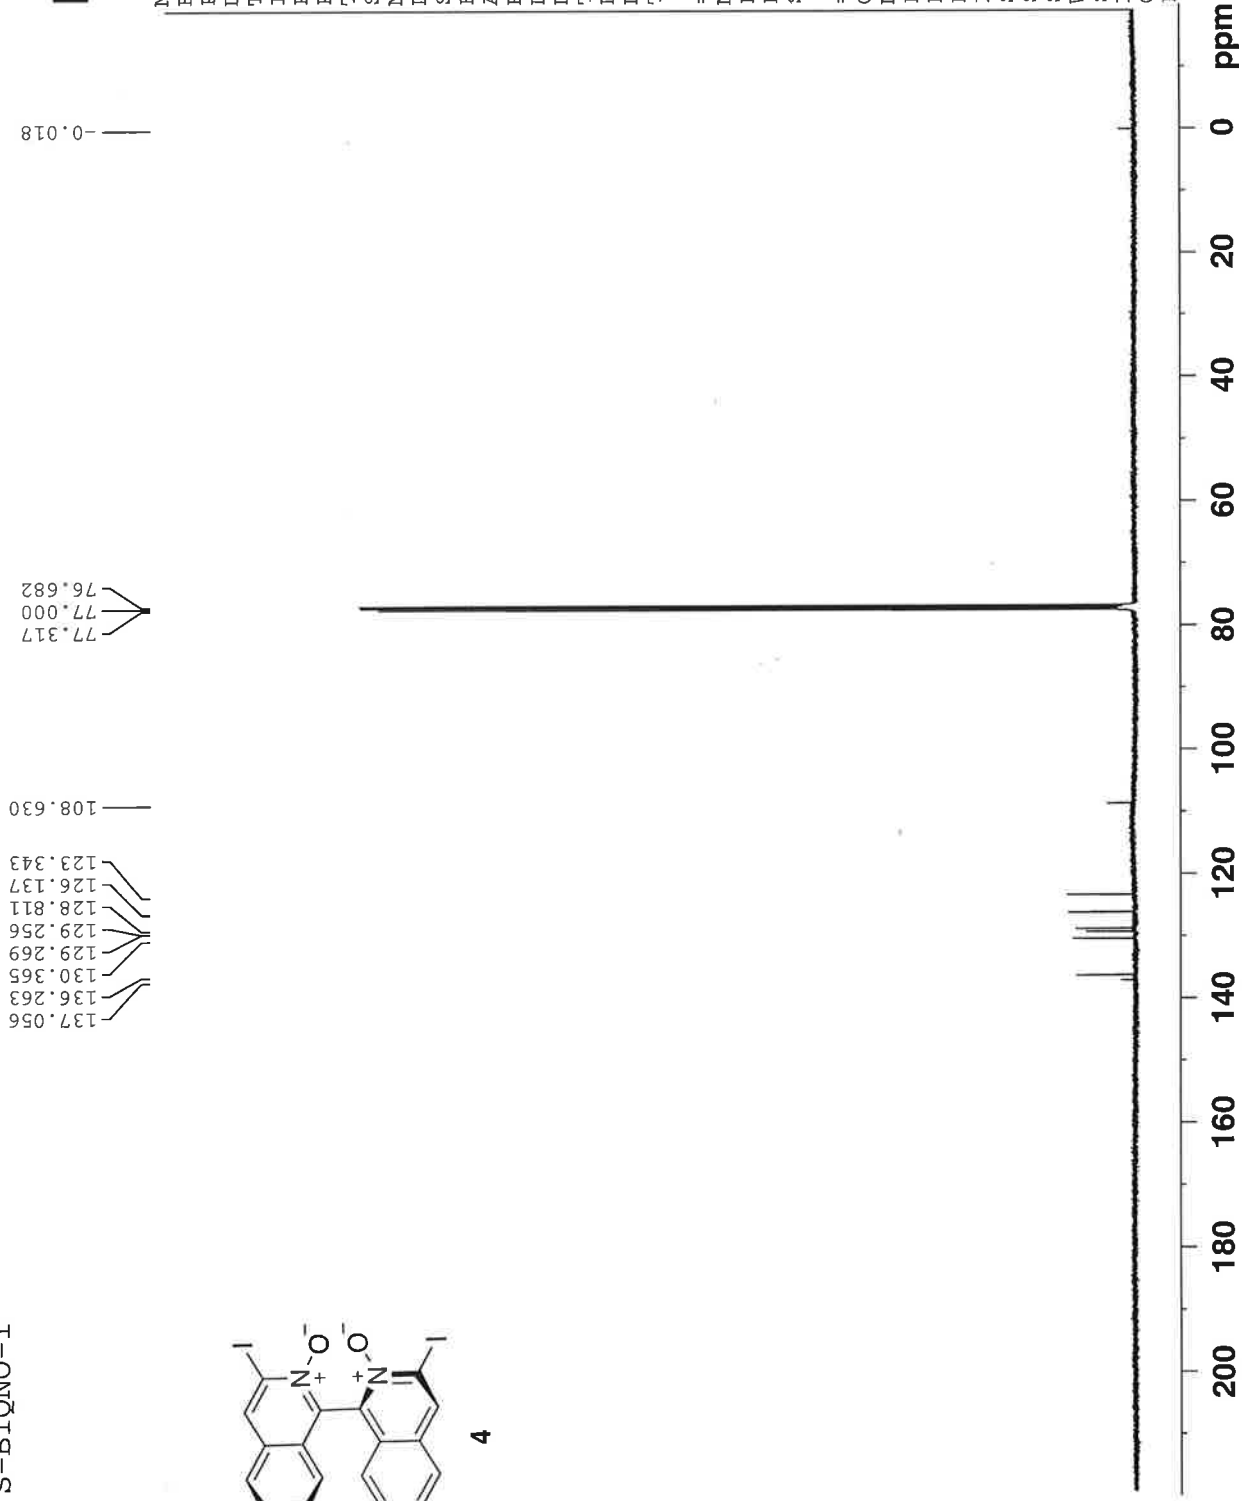

bn tms triazole

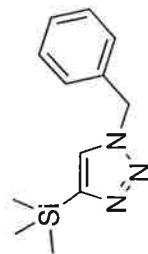

6a

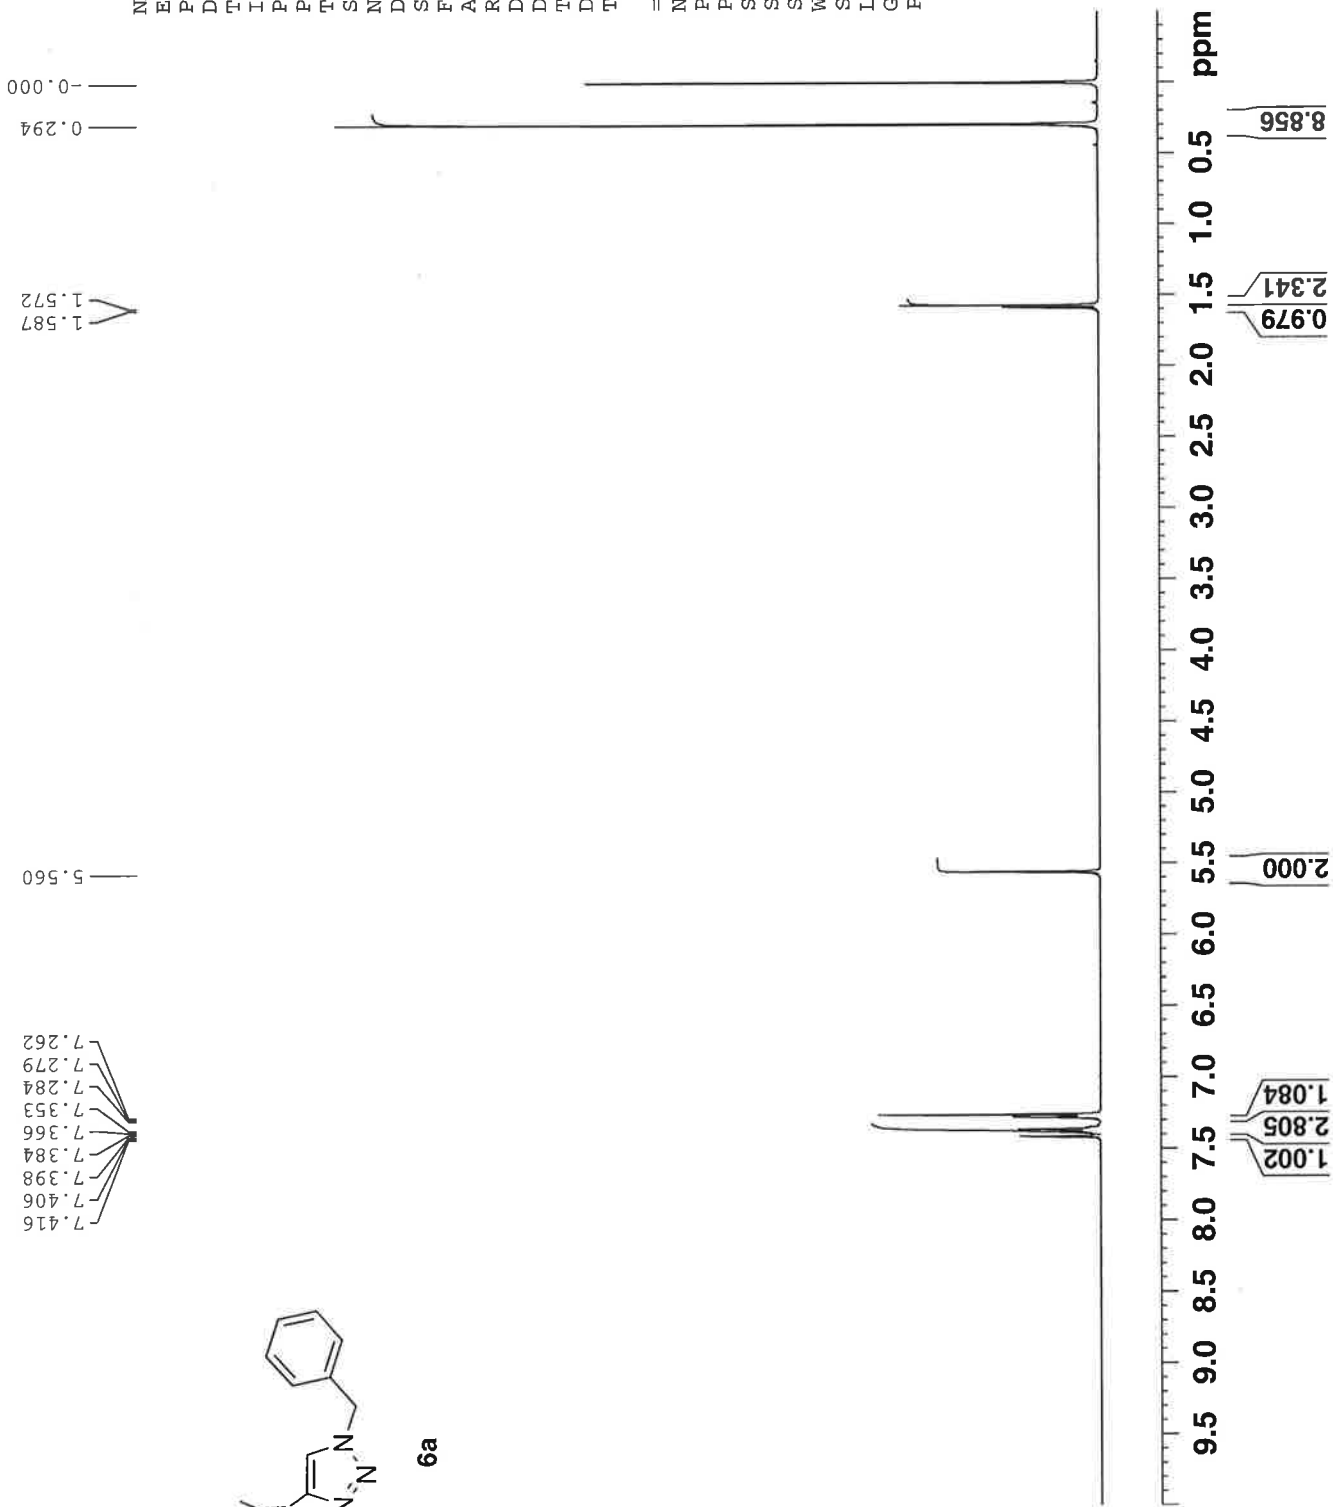

NAME Jan25-2021  
EXPNO 30  
PROCNO 1  
Date\_ 20210125  
Time 14.16  
INSTRUM spect  
PROBHD 5 mm PABBO BB-  
PULPROG zg30  
TD 65536  
SOLVENT CDCl3  
NS 16  
DS 2  
SWH 8278.146 Hz  
FIDRES 0.126314 Hz  
AQ 3.9584243 sec  
RG 456.1  
DW 60.400 usec  
DE 6.50 usec  
TE 295.5 K  
D1 1.00000000 sec  
TD0 1  
===== CHANNEL f1 =====  
NUC1 1H  
P1 11.60 usec  
PL1 3.00 dB  
SFO1 400.1324710 MHz  
SI 32768  
SF 400.1300089 MHz  
WDW EM  
SSB 0  
LB 0.30 Hz  
GB 0  
PC 1.00

mesityl triazole

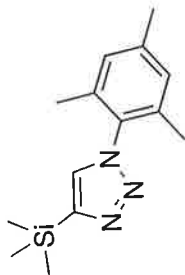

6b

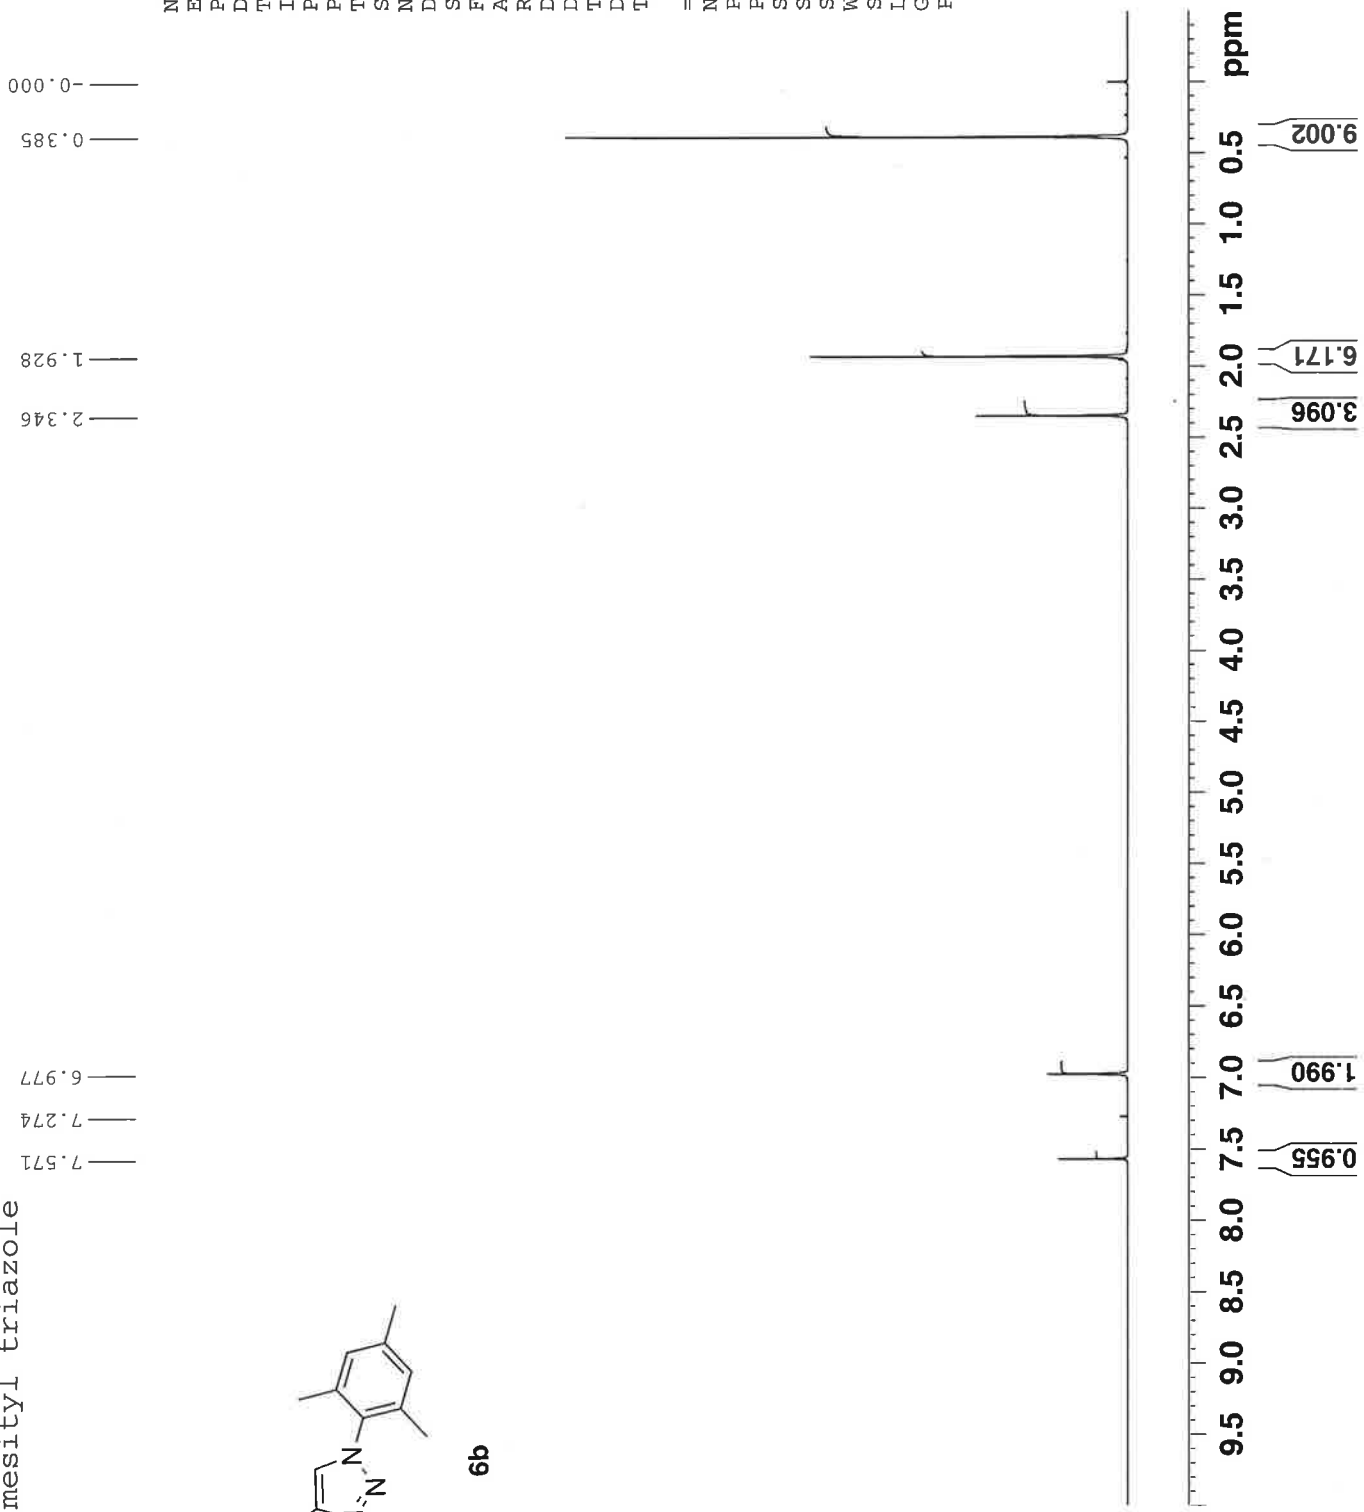

NAME Jan19-2021  
EXPNO 30  
PROCNO 1  
Date\_ 20210119  
Time\_ 13.49  
INSTRUM spect  
PROBHD 5 mm PABBO BB-  
PULPROG zg30  
TD 65536  
SOLVENT CDCl3  
NS 16  
DS 2  
SWH 8278.146 Hz  
FIDRES 0.126314 Hz  
AQ 3.9584243 sec  
RG 90.5  
DW 60.400 usec  
DE 6.50 usec  
TE 293.7 K  
D1 1.00000000 sec  
TDO 1

==== CHANNEL f1 =====  
NUC1 1H  
P1 11.60 usec  
PL1 3.00 dB  
SFO1 400.1324710 MHz  
SI 32768  
SF 400.1300038 MHz  
WDW EM  
SSB 0  
LB 0.30 Hz  
GB 0  
PC 1.00

mesityl triazole

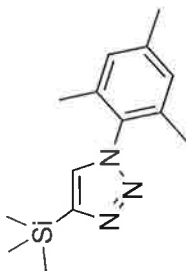

6b

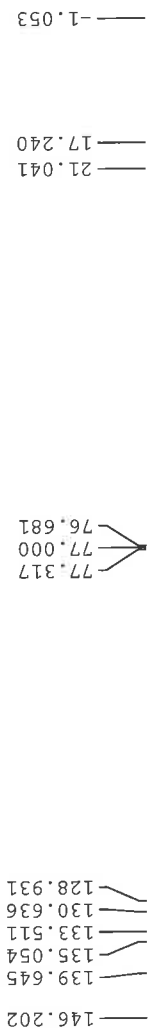

```

NAME Jan19-2022
EXPNO 31
PROCNO 1
Date_ 20210119
Time 14.57
INSTRUM spect
PROBHD 5 mm PABBO BB-
PULPROG zgpg30
TD 65536
SOLVENT CDC13
NS 1024
DS 4
SWH 23980.814 Hz
FIDRES 0.365918 Hz
AQ 1.3664756 sec
RG 32768
DW 20.850 usec
DE 6.50 usec
TE 298.8 K
D1 2.00000000 sec
D11 0.03000000 sec
TD0 1
    
```

```

===== CHANNEL f1 =====
NUC1 13C
P1 14.75 usec
PL1 0.00 dB
SFO1 100.6228298 MHz

===== CHANNEL f2 =====
CPDPRG2 waltz16
NUC2 1H
PCPD2 80.00 usec
PL2 -2.00 dB
PL12 12.54 dB
PL13 15.00 dB
SFO2 400.1316005 MHz
SI 32768
SF 100.6127732 MHz
WDW EM
SSB 0
LB 1.00 Hz
GB 0
PC 1.40
    
```

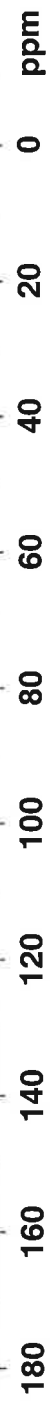

diphenyl triazole

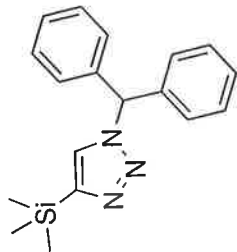

6c

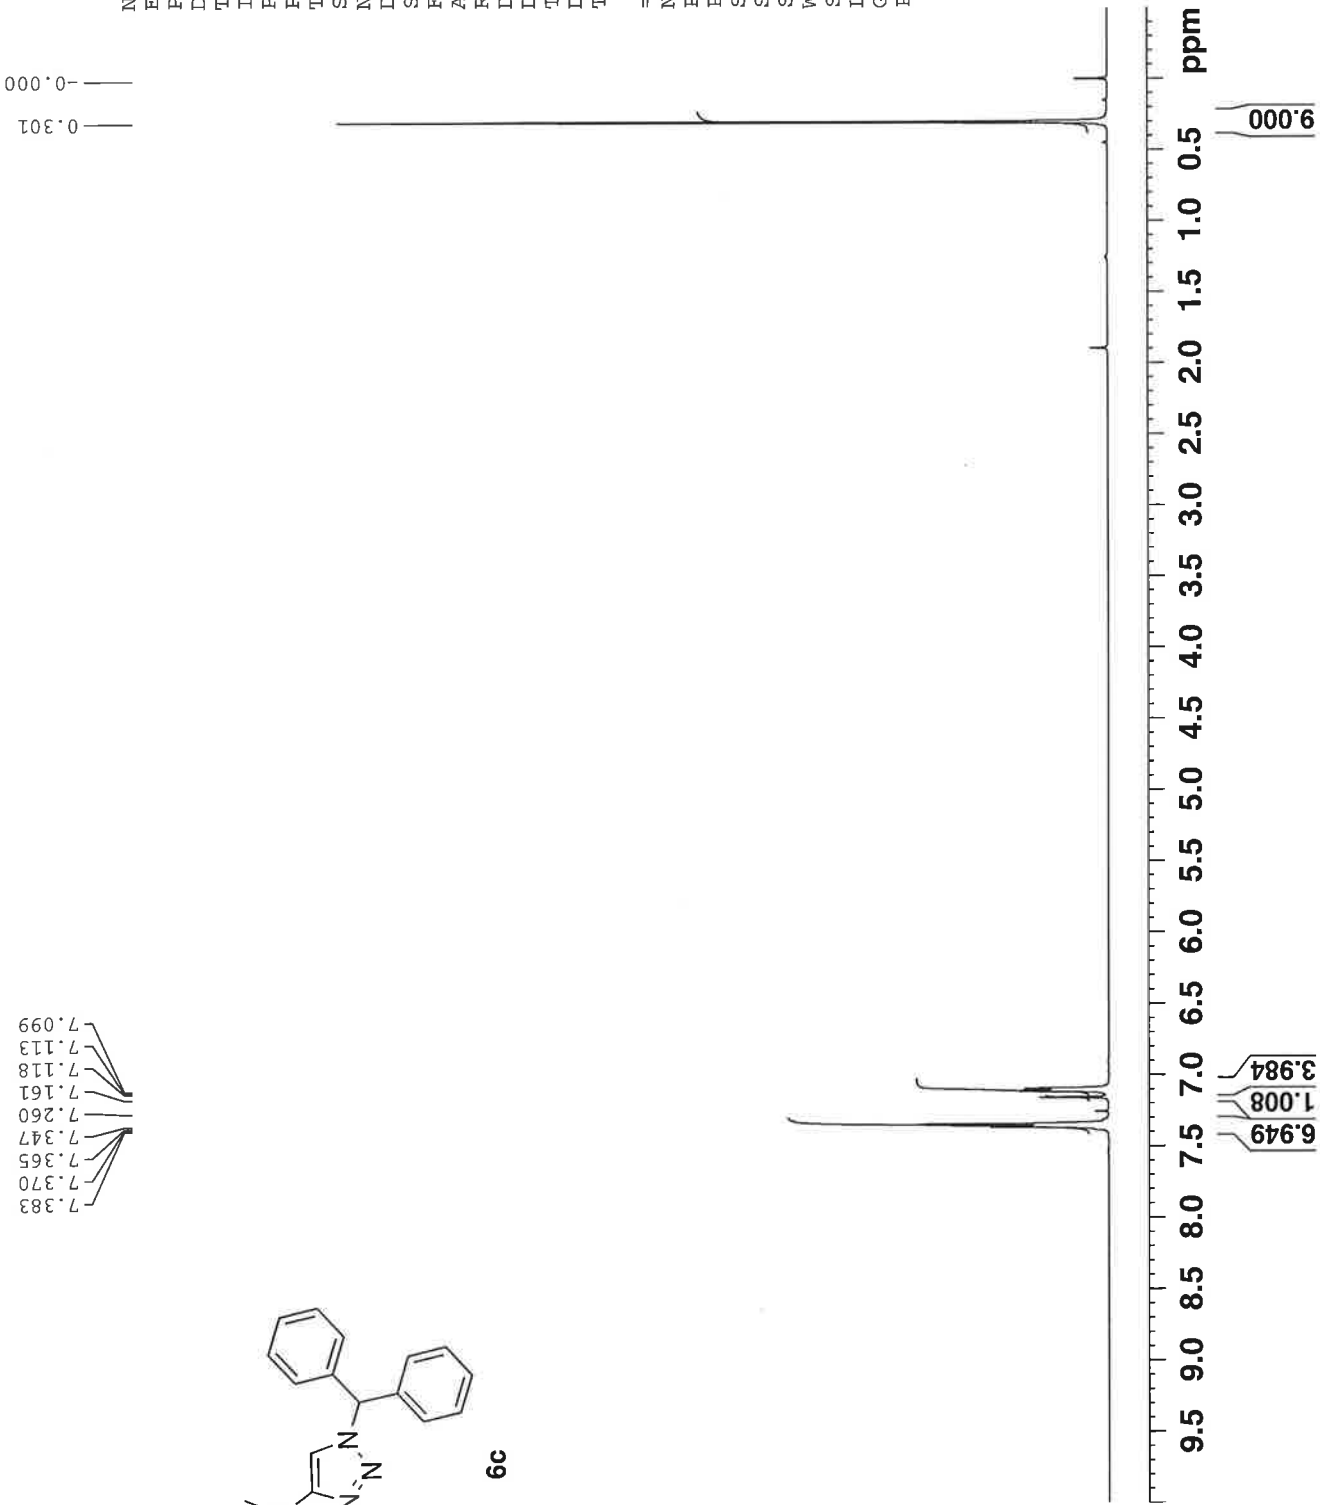

NAME  
EXPNO 20  
PROCNO 1  
Date\_ 20210111  
Time\_ 13.21  
INSTRUM spect  
PROBHD 5 mm PABBO BB-  
PULPROG zg30  
TD 65536  
SOLVENT CDCl3  
NS 16  
DS 2  
SWH 8278.146 Hz  
FIDRES 0.126314 Hz  
AQ 3.9584243 sec  
RG 114  
DW 60.400 usec  
DE 6.50 usec  
TE 293.3 K  
D1 1.00000000 sec  
TD0 1

==== CHANNEL f1 =====  
NUC1 1H  
P1 11.60 usec  
PL1 3.00 dB  
SFO1 400.1324710 MHz  
SI 32768  
SF 400.1300099 MHz  
WDW EM  
SSB 0  
LB 0.30 Hz  
GB 0  
PC 1.00

diphenyl triazole

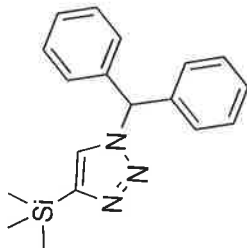

6c

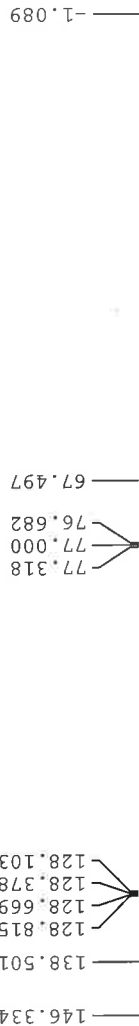

NAME Jan11-2021  
 EXPNO 21  
 PROCNO 1  
 Date\_ 20210111  
 Time 15.25  
 INSTRUM spect  
 PROBHD 5 mm PABBO BB-  
 PULPROG zgpg30  
 TD 65536  
 SOLVENT CDC13  
 NS 2048  
 DS 4  
 SWH 23980.814 Hz  
 FIDRES 0.365918 Hz  
 AQ 1.3664756 sec  
 RG 32768  
 DW 20.850 usec  
 DE 6.50 usec  
 TE 298.7 K  
 D1 2.0000000 sec  
 D11 0.0300000 sec  
 TD0 1

==== CHANNEL f1 =====  
 NUC1 13C  
 P1 14.75 usec  
 PL1 0.00 dB  
 SFO1 100.6228298 MHz

==== CHANNEL f2 =====  
 CPDPRG2 waltz16  
 NUC2 1H  
 PCPD2 80.00 usec  
 PL2 -2.00 dB  
 PL12 12.54 dB  
 PL13 15.00 dB  
 SFO2 400.1316005 MHz  
 SI 32768  
 SF 100.6127733 MHz  
 WDM EM  
 SSB 0  
 LB 1.00 Hz  
 GB 0  
 PC 1.40

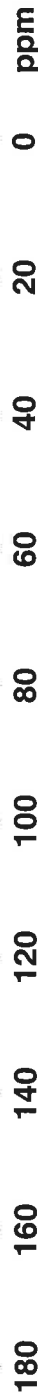

adamantane triazole

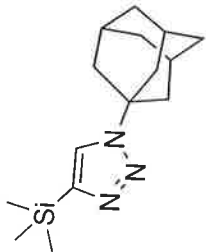

6d

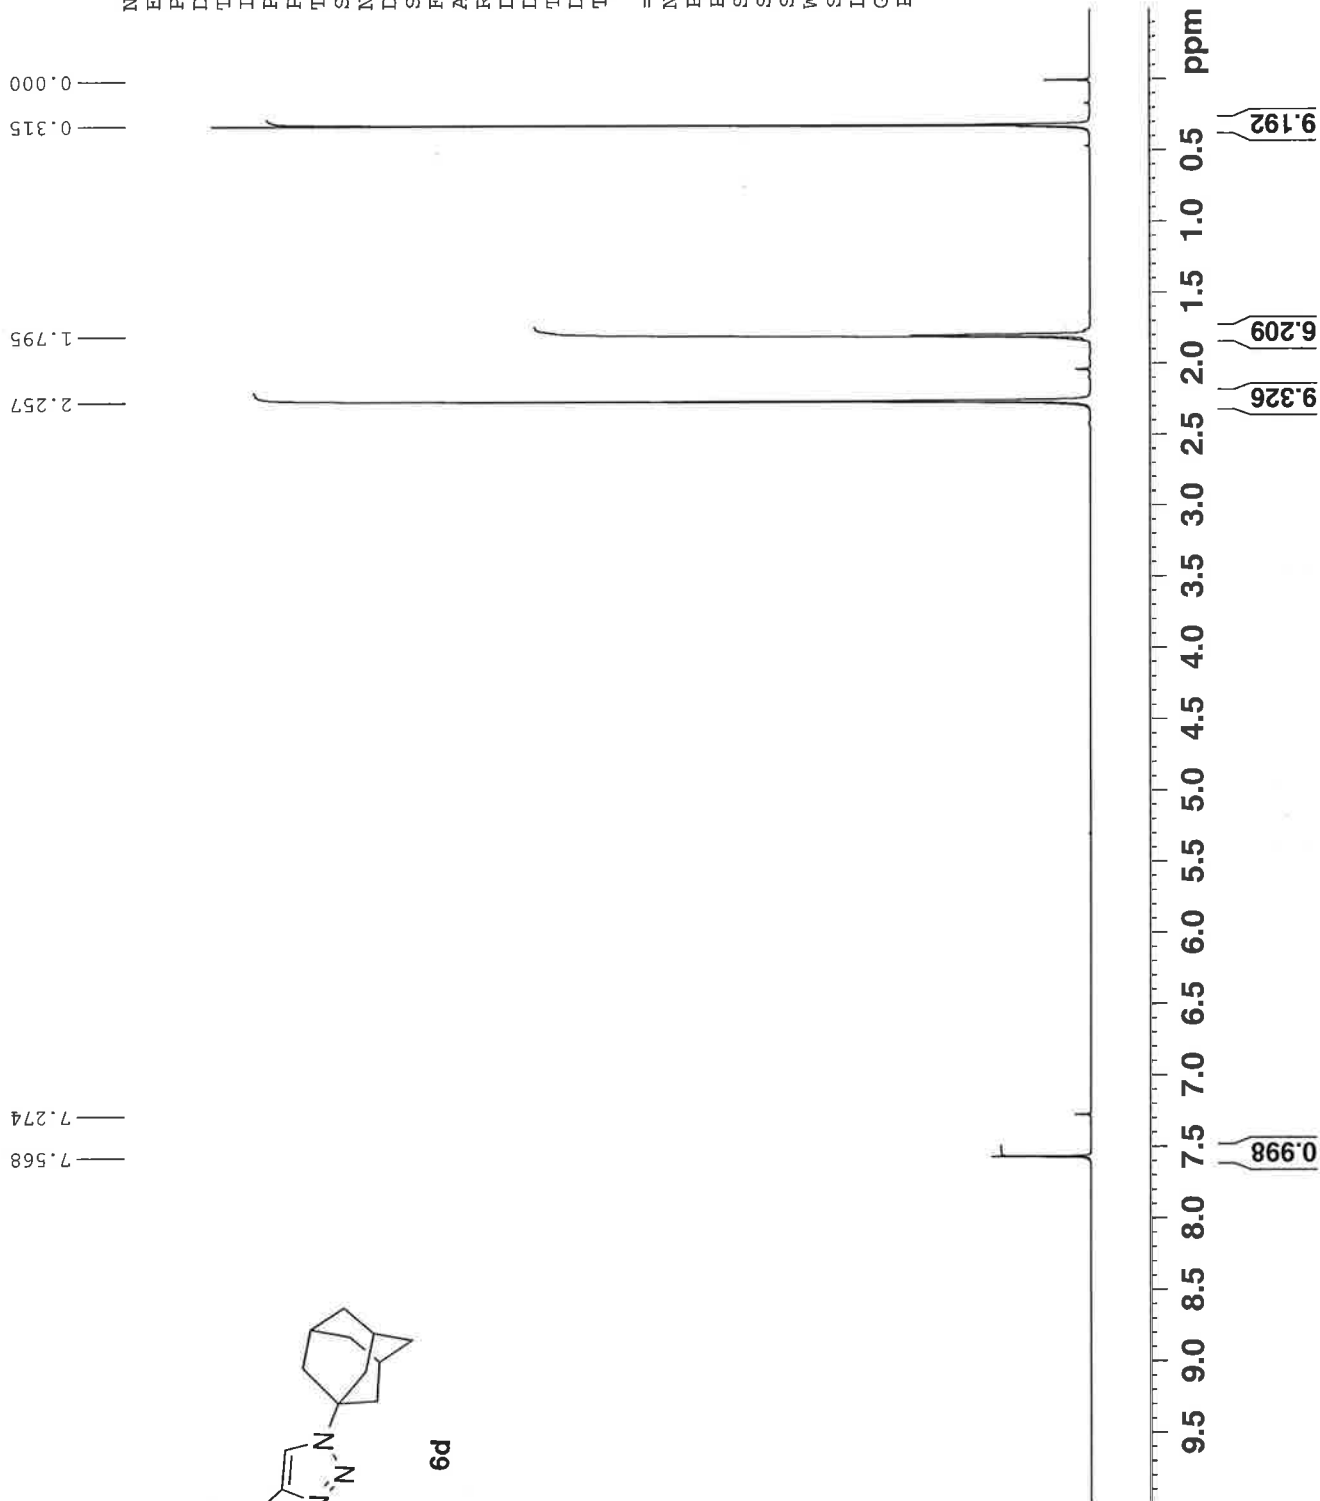

NAME  
EXPNO 20  
PROCNO 1  
Date\_ 20210115  
Time 10.55  
INSTRUM spect  
PROBHD 5 mm FAPBO BB-  
PULPROG zg30  
TD 65536  
SOLVENT CDCl3  
NS 16  
DS 2  
SWH 8278.146 Hz  
FIDRES 0.126314 Hz  
AQ 3.9584243 sec  
RG 90.5  
DW 60.400 usec  
DE 6.50 usec  
TE 293.4 K  
D1 1.00000000 sec  
TD0 1

==== CHANNEL f1 =====  
NUC1 1H  
P1 11.60 usec  
PL1 3.00 dB  
SFO1 400.1324710 MHz  
SI 32768  
SF 400.1300039 MHz  
WDW EM  
SSB 0  
LB 0.30 Hz  
GB 0  
PC 1.00



adamantane triazole

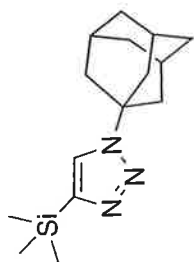

6d

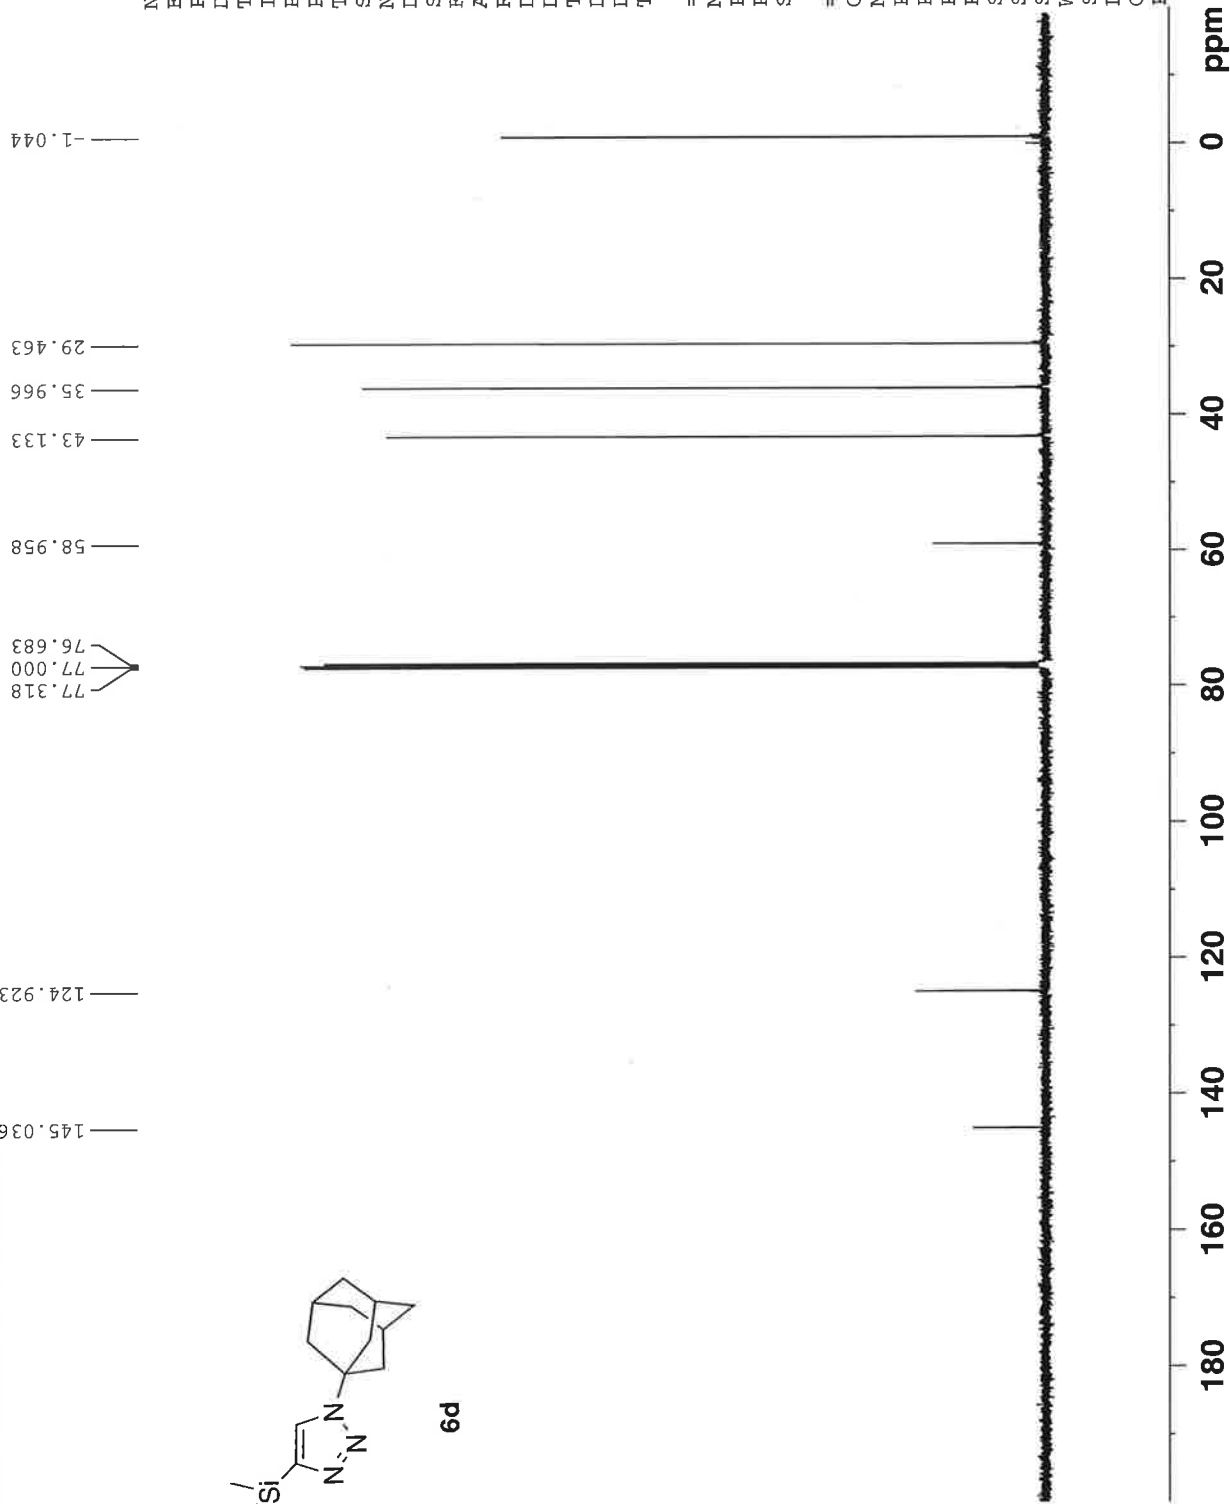

```

NAME                               Jan15-2021
EXPNO                               21
PROCNO                              1
Date_                               20210115
Time_                               11.56
INSTRUM                             spect
PROBHD                               5 mm PABBO BB-
PULPROG                             zpgpg30
TD                                   65536
SOLVENT                             CDCl3
NS                                   1024
DS                                   4
SWH                                  23980.814 Hz
FIDRES                              0.365918 Hz
AQ                                   1.36664756 sec
RG                                   32768
DW                                  20.850 usec
DE                                  6.50 usec
TE                                   298.6 K
D1                                   2.00000000 sec
D11                                  0.03000000 sec
TD0                                  1

===== CHANNEL f1 =====
NUC1                                  13C
P1                                   14.75 usec
PL1                                  0.00 dB
SFO1                                 100.6228298 MHz

===== CHANNEL f2 =====
CPDPRG2                             waltz16
NUC2                                  1H
PCPD2                                80.00 usec
PL2                                  -2.00 dB
PL12                                 12.54 dB
PL13                                 15.00 dB
SFO2                                 400.1316005 MHz
SI                                   32768
SF                                   100.6127720 MHz
WDW                                   EM
SSB                                   0
LB                                   1.00 Hz
GB                                   0
PC                                   1.40
    
```

9.157  
8.830  
8.033  
8.013  
7.600  
7.582  
7.563  
7.562  
7.431  
7.430  
7.411  
7.393  
7.391  
7.335  
7.323  
7.320  
7.313  
7.309  
7.300  
7.295  
7.289  
7.285  
7.277  
7.264  
7.258  
7.252  
7.045  
7.024  
5.572  
5.535  
5.524  
5.487

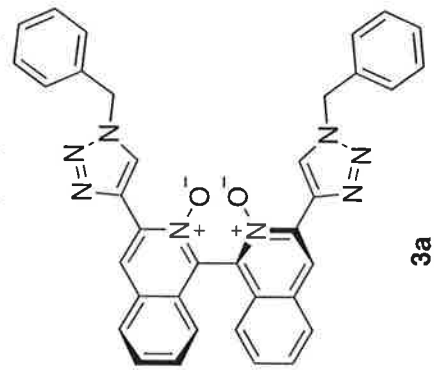

28

NAME Nov04-2019  
 EXPNO 6  
 PROCNO 1  
 Date\_ 20191104  
 Time 17.02  
 INSTRUM spect  
 PROBHD 5 mm TBI 1H/31  
 PULPROG zg30  
 TD 65536  
 SOLVENT CDCl3  
 NS 16  
 DS 2  
 SWH 8278.146 Hz  
 FIDRES 0.126314 Hz  
 AQ 3.9584243 sec  
 RG 181  
 DW 60.400 usec  
 DE 6.50 usec  
 TE 300.0 K  
 D1 1.00000000 sec  
 TD0 1

==== CHANNEL f1 =====  
 NUC1 1H  
 P1 11.75 usec  
 PL1 3.00 dB  
 SFO1 400.1324710 MHz  
 SI 32768  
 SF 400.1300076 MHz  
 WDW EM  
 SSB 0  
 LB 0.30 Hz  
 GB 0  
 PC 1.00

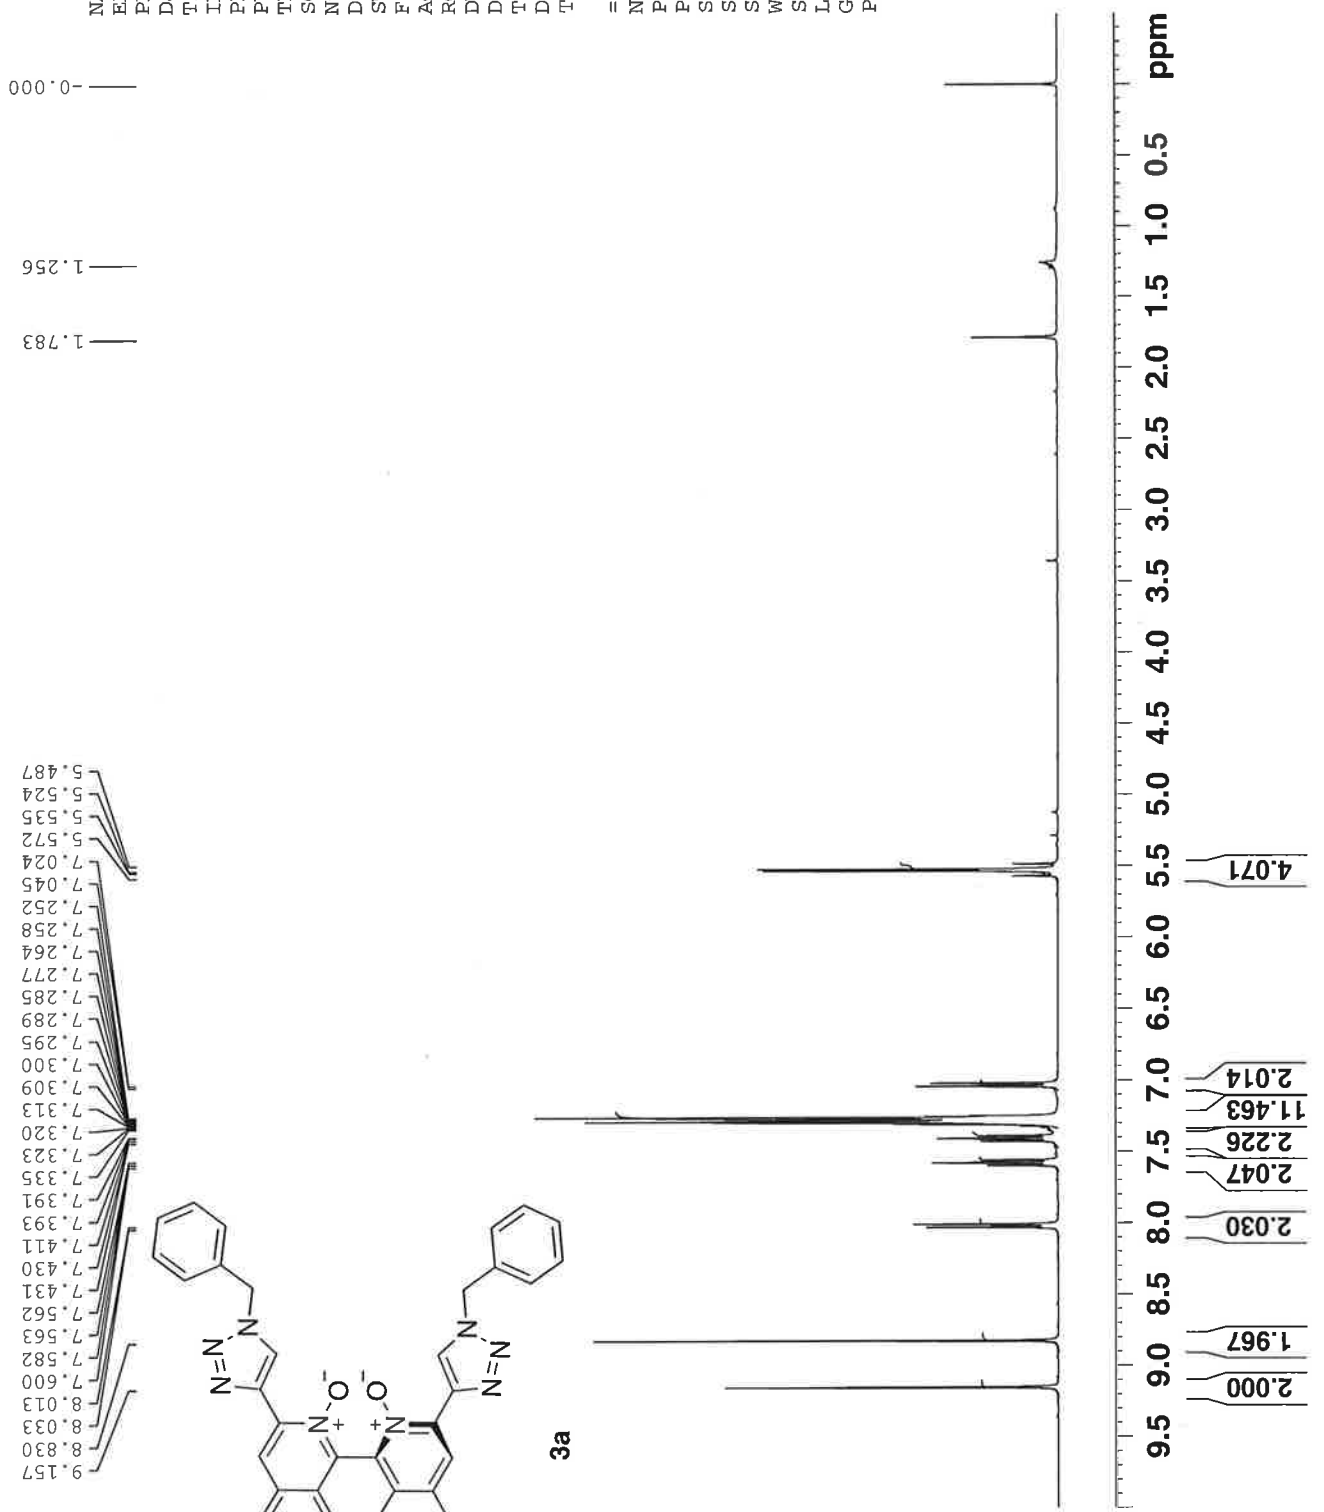

s-BIQNO-triazole-Bn

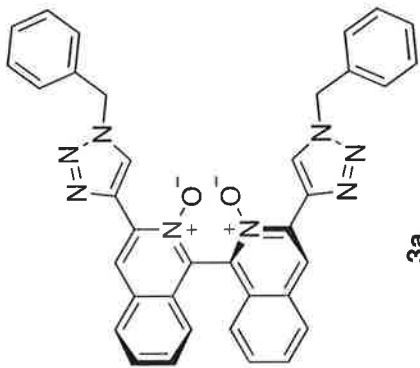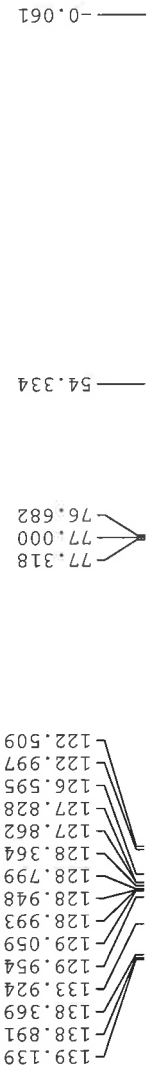

NAME Nov04-2019  
 EXPNO 8  
 PROCNO 1  
 Date\_ 20191105  
 Time 6.35  
 INSTRUM spect  
 PROBHD 5 mm TBI 1H/31  
 PULPROG zgpg30  
 TD 65536  
 SOLVENT CDCl3  
 NS 10000  
 DS 4  
 SWH 23980.814 Hz  
 FIDRES 0.365918 Hz  
 AQ 1.3664756 sec  
 RG 16384  
 DW 20.850 usec  
 DE 6.50 usec  
 TE 300.0 K  
 D1 2.00000000 sec  
 D11 0.03000000 sec  
 TD0 1

==== CHANNEL f1 =====  
 NUC1 13C  
 P1 21.00 usec  
 PL1 -4.00 dB  
 SFO1 100.6228298 MHz

==== CHANNEL f2 =====  
 CPDPRG2 waltz16  
 NUC2 1H  
 PCPD2 80.00 usec  
 PL2 -2.00 dB  
 PL12 14.49 dB  
 PL13 14.49 dB  
 SFO2 400.1316005 MHz  
 SI 32768  
 SF 100.6127785 MHz  
 WDW EM  
 SSB 0  
 LB 1.00 Hz  
 GB 0  
 PC 1.40

180 160 140 120 100 80 60 40 20 0 ppm

mono-coupling P

7.603  
7.600  
7.589  
7.587  
7.582  
7.580  
7.572  
7.569  
7.551  
7.549  
7.463  
7.460  
7.445  
7.442  
7.439  
7.424  
7.421  
7.338  
7.333  
7.330  
7.324  
7.320  
7.311  
7.308  
7.302  
7.295  
7.290  
7.283  
7.278  
7.263  
7.069  
7.067  
7.061  
7.059  
7.046  
7.040  
7.038  
5.559  
5.553

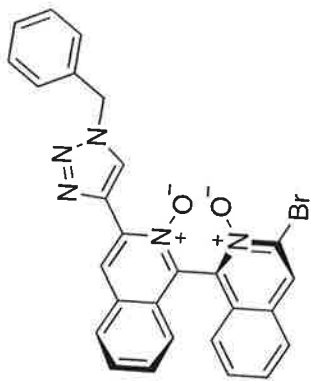

S1

NAME Aug28-2019  
 EXPNO 2  
 PROCNO 1  
 Date\_ 20190828  
 Time\_ 16.10  
 INSTRUM spect  
 PROBHD 5 mm TBI 1H/31  
 PULPROG zg30  
 TD 65536  
 SOLVENT CDC13  
 NS 16  
 DS 2  
 SWH 8278.146 Hz  
 FIDRES 0.126314 Hz  
 AQ 3.9584243 sec  
 RG 574.7  
 DW 60.400 usec  
 DE 6.50 usec  
 TE 300.0 K  
 D1 1.00000000 sec  
 TD0 1

==== CHANNEL f1 =====  
 NUC1 1H  
 P1 11.75 usec  
 PL1 3.00 dB  
 SFO1 400.1324710 MHz  
 SI 32768  
 SF 400.1300082 MHz  
 WDW EM  
 SSB 0  
 LB 0.30 Hz  
 GB 0  
 PC 1.00

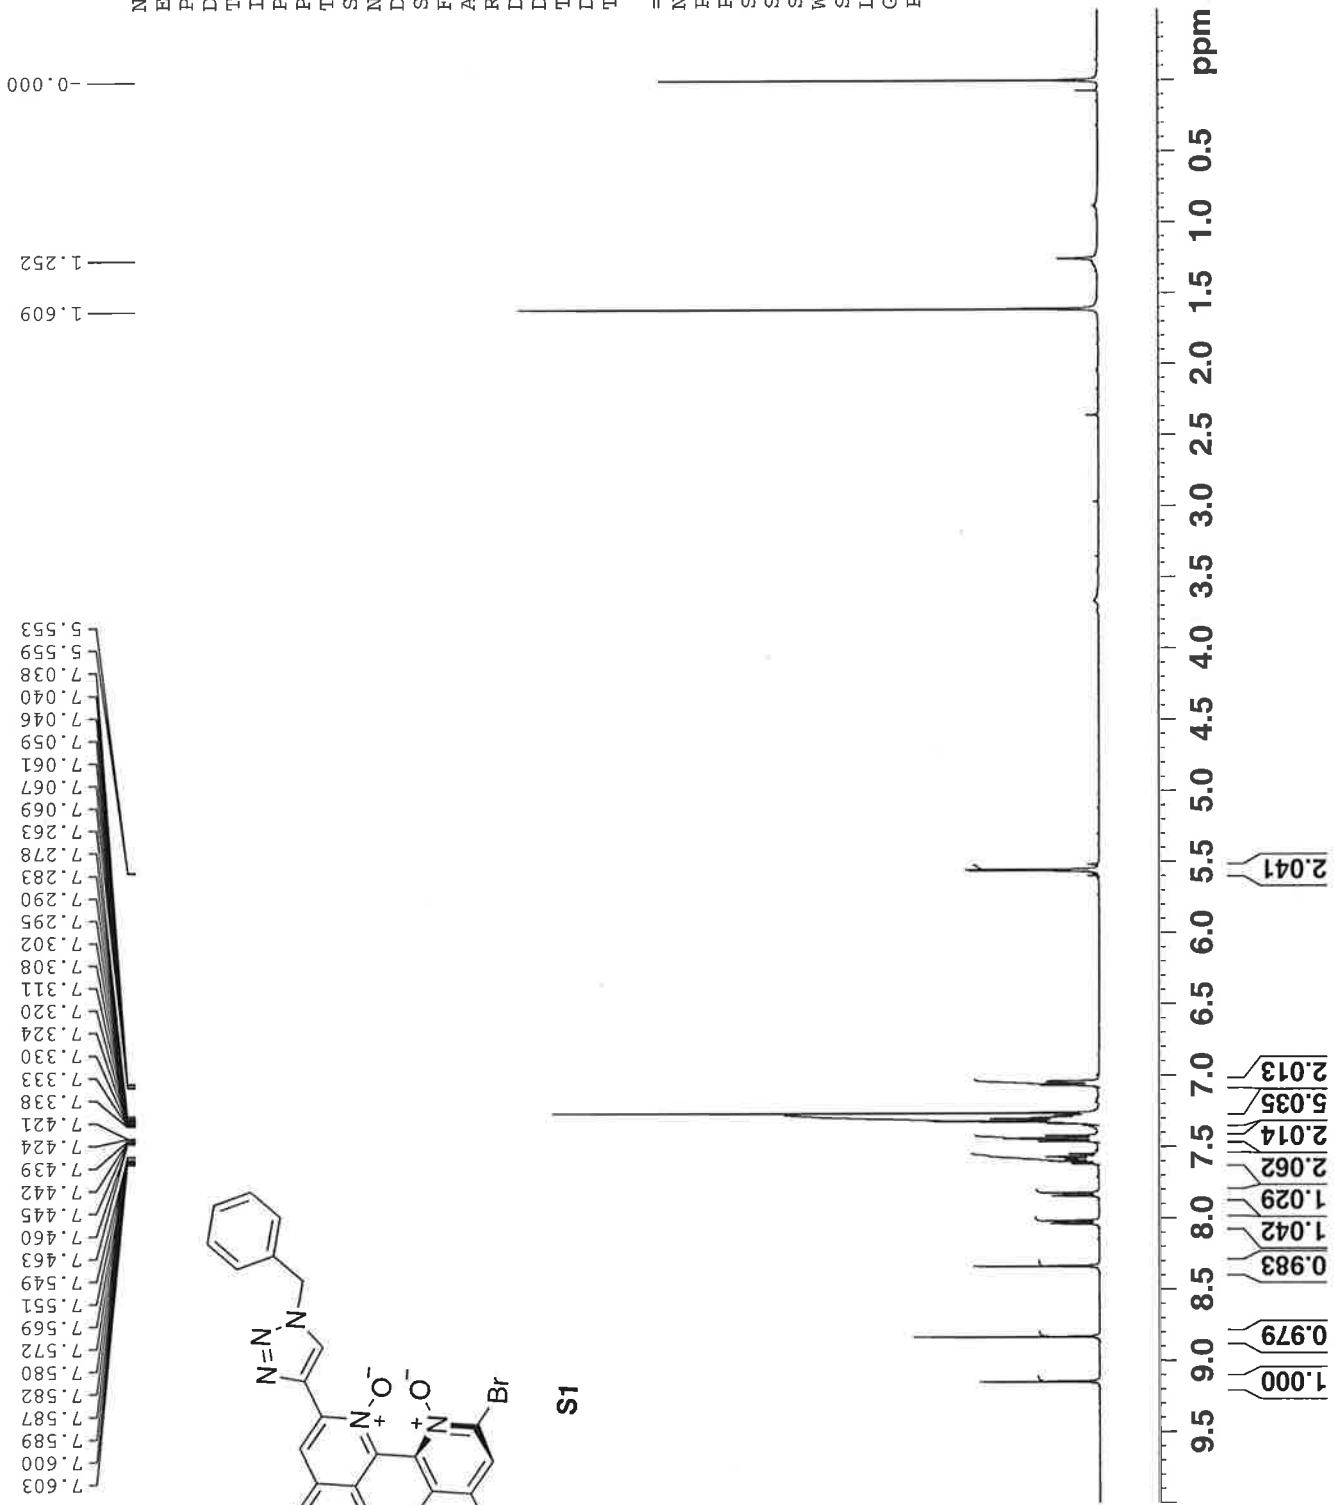

mono-coupling product

139.191  
138.922  
138.830  
138.018  
134.016  
131.190  
130.260  
129.883  
129.149  
129.111  
128.990  
128.936  
128.875  
128.563  
128.407  
127.865  
126.604  
126.400  
123.358  
123.059  
122.703

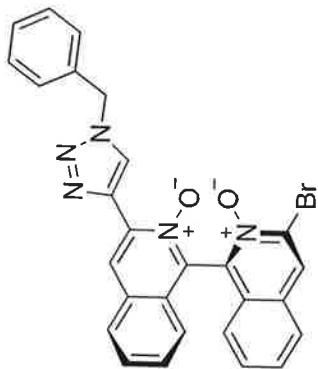

S1

77.317  
77.000  
76.682  
54.417  
-0.021

NAME  
EXPNO 6  
PROCNO 1  
Date\_ 20190829  
Time 6.17  
INSTRUM spect  
PROBHD 5 mm TBI 1H/31  
PULPROG zgpg30  
TD 65536  
SOLVENT CDC13  
NS 12000  
DS 4  
SWH 23980.814 Hz  
FIDRES 0.365918 Hz  
AQ 1.3664756 sec  
RG 20642.5  
DW 20.850 usec  
DE 6.50 usec  
TE 300.0 K  
D1 2.00000000 sec  
D11 0.03000000 sec  
TD0 1

S45

==== CHANNEL f1 =====  
NUC1 13C  
P1 21.00 usec  
PL1 -4.00 dB  
SFO1 100.6228298 MHz  
  
==== CHANNEL f2 =====  
CPDPRG2 waltz16  
NUC2 1H  
PCPD2 80.00 usec  
PL2 -2.00 dB  
PL12 14.49 dB  
PL13 14.49 dB  
SFO2 400.1316005 MHz  
SI 32768  
SF 100.6127716 MHz  
WDW EM  
SSB 0  
LB 1.00 Hz  
GB 0  
PC 1.40

180 160 140 120 100 80 60 40 20 0 ppm

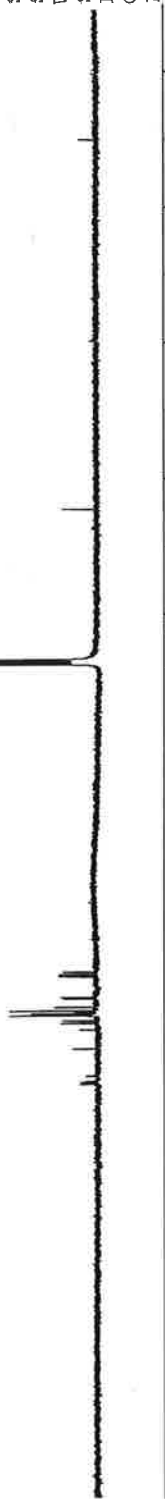

mesityl\_catalyst

9.302  
9.001  
8.094  
8.073  
7.652  
7.633  
7.614  
7.500  
7.480  
7.462  
7.266  
7.148  
7.127  
6.968

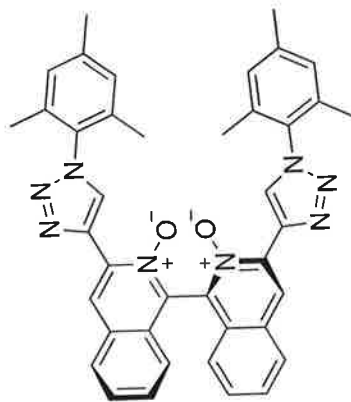

3b

2.334  
1.992  
0.000

NAME Jan18-2023  
 EXPNO 20  
 PROCNO 1  
 Date\_ 20210118  
 Time 18.06  
 INSTRUM spect  
 PROBHD 5 mm PABBO BB-  
 PULPROG zg30  
 TD 65536  
 SOLVENT CDC13  
 NS 16  
 DS 2  
 SMH 8278.146 Hz  
 FIDRES 0.126314 Hz  
 AQ 3.9584243 sec  
 RG 128  
 DW 60.400 usec  
 DE 6.50 usec  
 TE 294.6 K  
 D1 1.00000000 sec  
 TD0 1

==== CHANNEL f1 =====  
 NUC1 1H  
 P1 11.60 usec  
 PL1 3.00 dB  
 SFO1 400.1324710 MHz  
 SI 32768  
 SF 400.1300072 MHz  
 WDW EM  
 SSB 0  
 LB 0.30 Hz  
 GB 0  
 PC 1.00

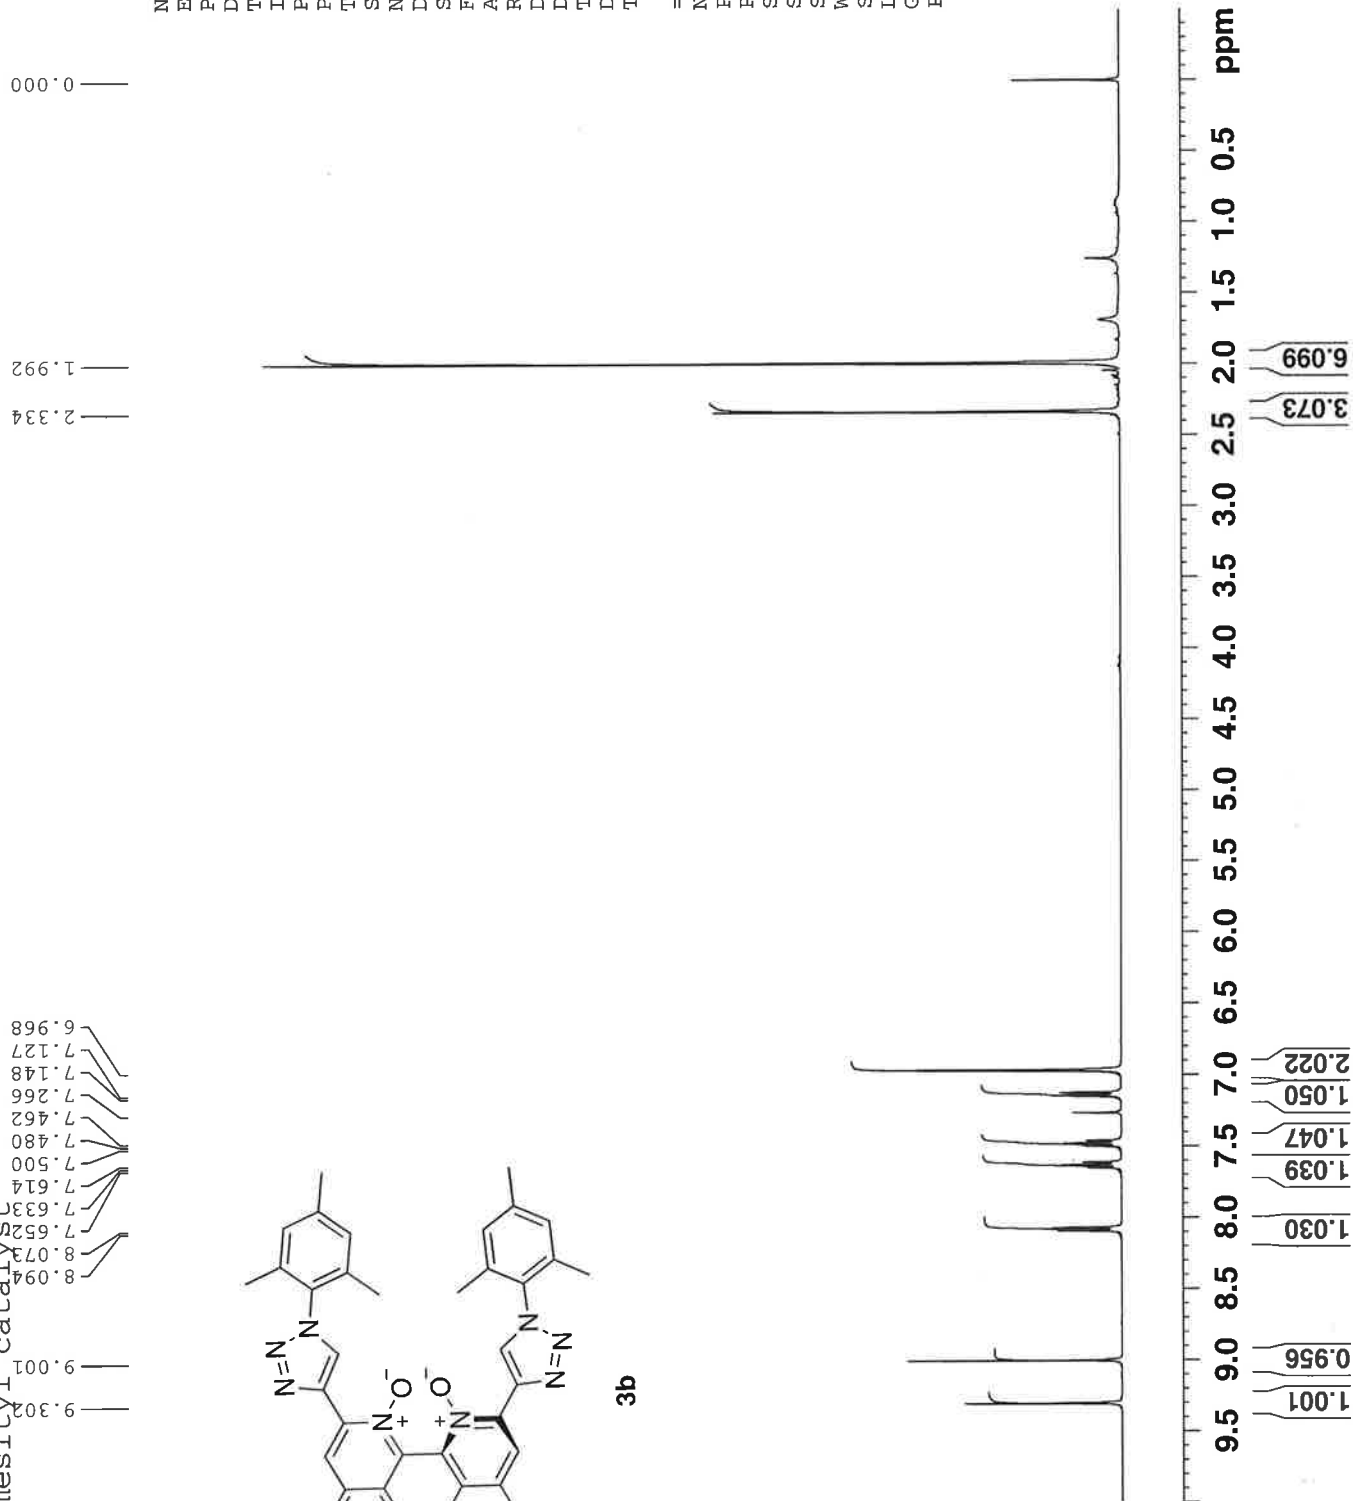

mesityl catalyst

140.054  
139.120  
138.824  
138.560  
135.006  
133.131  
130.043  
129.128  
129.089  
129.012  
128.695  
128.094  
127.909  
123.165  
122.746

77.318  
77.000  
76.683

21.088  
17.350

-0.042

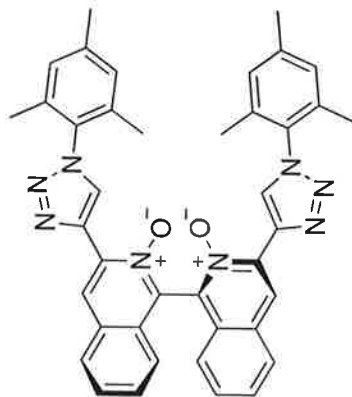

3b

NAME Jan18-2023  
 EXPNO 21  
 PROCNO 1  
 Date\_ 20210119  
 Time 3.40  
 INSTRUM spect  
 PROBHD 5 mm PABBO BB-  
 PULPROG zgpg30  
 TD 65536  
 SOLVENT CDC13  
 NS 10000  
 DS 4  
 SWH 23980.814 Hz  
 FIDRES 0.365918 Hz  
 AQ 1.3664756 sec  
 RG 32768  
 DW 20.850 usec  
 DE 6.50 usec  
 TE 299.0 K  
 D1 2.00000000 sec  
 D11 0.03000000 sec  
 TD0 1

==== CHANNEL f1 =====  
 NUC1 13C  
 P1 14.75 usec  
 PL1 0.00 dB  
 SFO1 100.6228298 MHz  
 ===== CHANNEL f2 =====  
 CPDPRG2 waltz16  
 NUC2 1H  
 PCPD2 80.00 usec  
 PL2 -2.00 dB  
 PL12 12.54 dB  
 PL13 15.00 dB  
 SFO2 400.1316005 MHz  
 SI 32768  
 SF 100.6127722 MHz  
 WDW EM  
 SSB 0  
 LB 1.00 Hz  
 GB 0  
 PC 1.40

180 160 140 120 100 80 60 40 20 0 ppm

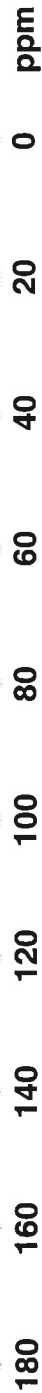

mes monocouple

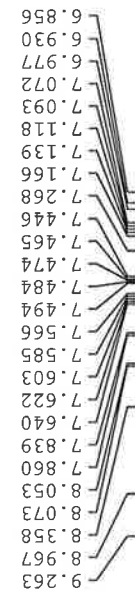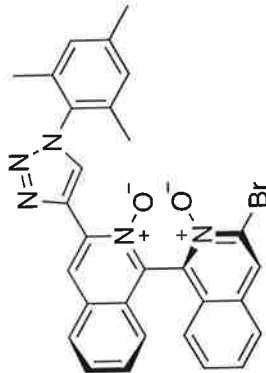

S2

Feb05-2021  
NAME EXPNO 40  
PROCNO 1  
Date\_ 20210205  
Time 15.47  
INSTRUM spect  
PROBHD 5 mm FAPBO BB-  
PULPROG zg30  
TD 65536  
SOLVENT CDC13  
NS 16  
DS 2  
SWH 8278.146 Hz  
FIDRES 0.126314 Hz  
AQ 3.9584243 sec  
RG 114  
DW 60.400 usec  
DE 6.50 usec  
TE 293.4 K  
D1 1.00000000 sec  
TD0 1

==== CHANNEL f1 =====  
NUC1 1H  
P1 11.60 usec  
PL1 3.00 dB  
SFO1 400.1324710 MHz  
SI 32768  
SF 400.1300066 MHz  
WDW EM  
SSB 0  
LB 0.30 Hz  
GB 0  
PC 1.00

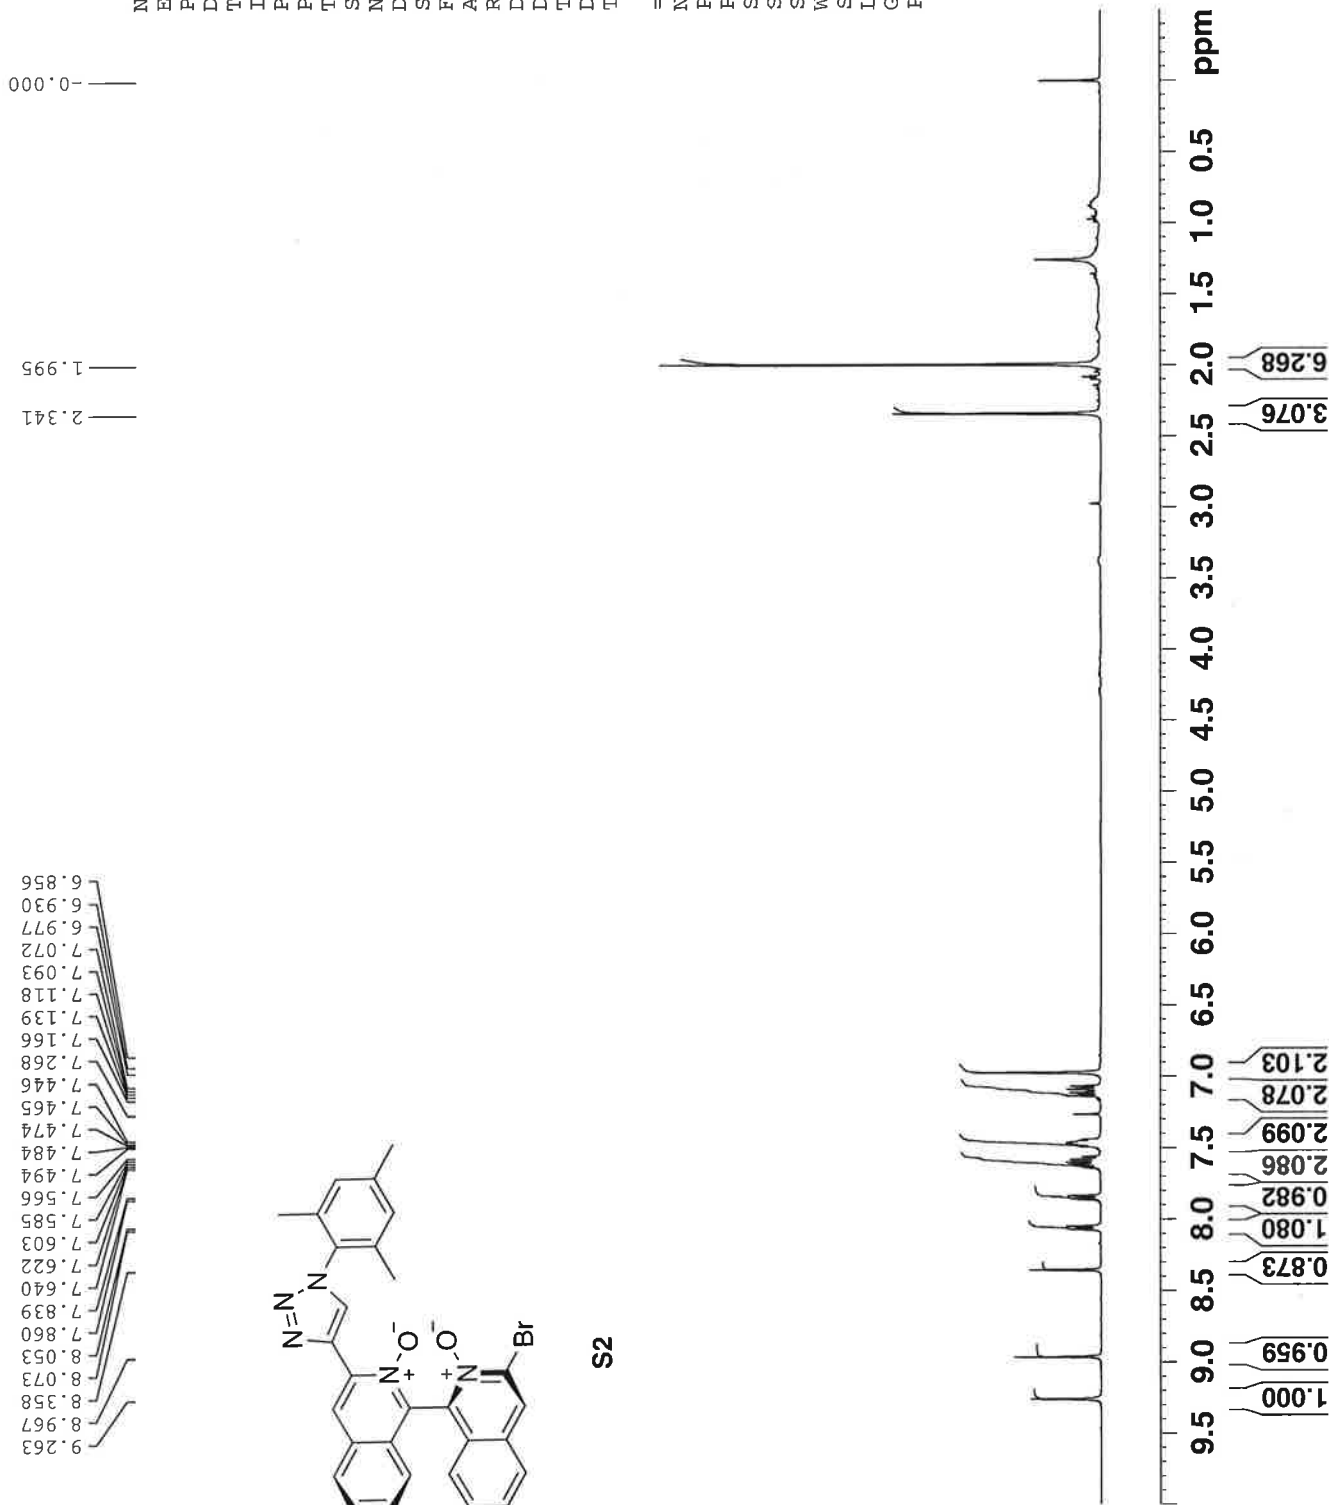



Mes-mono

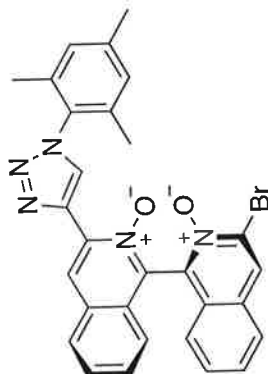

S2

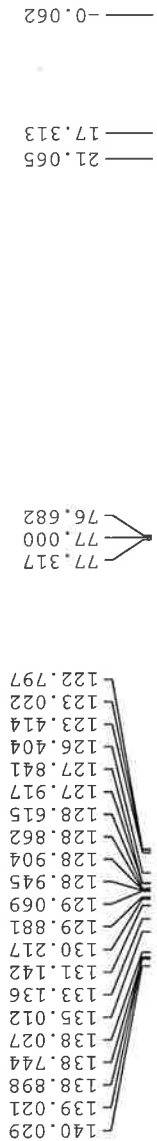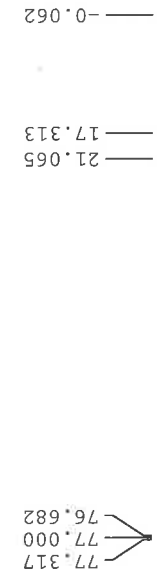

Feb12-2021  
NAME  
EXPNO 31  
PROCNO 1  
Date\_ 20210213  
Time 6.45  
INSTRUM spect  
PROBHD 5 mm FAPBO BB-  
PULPROG zgpg30  
TD 65536  
SOLVENT CDC13  
NS 10000  
DS 4  
SWH 23980.814 Hz  
FIDRES 0.365918 Hz  
AQ 1.3664756 sec  
RG 32768  
DW 20.850 usec  
DE 6.50 usec  
TE 300.7 K  
D1 2.00000000 sec  
D11 0.03000000 sec  
TDO 1

==== CHANNEL f1 =====  
NUC1 13C  
P1 14.75 usec  
PL1 0.00 dB  
SFO1 100.6228298 MHz

==== CHANNEL f2 =====  
CPDPRG2 waltz16  
NUC2 1H  
PCPD2 80.00 usec  
PL2 -2.00 dB  
PL12 12.54 dB  
PL13 15.00 dB  
SFO2 400.1316005 MHz  
SI 32768  
SF 100.6127746 MHz  
WDW EM  
SSB 0  
LB 1.00 Hz  
GB 0  
PC 1.40

180 160 140 120 100 80 60 40 20 0 ppm

di-ph-dicouple

9.202  
8.800  
8.031  
8.010  
7.597  
7.579  
7.560  
7.432  
7.413  
7.394  
7.318  
7.309  
7.302  
7.289  
7.285  
7.258  
7.185  
7.132  
7.123  
7.114  
7.015  
6.994

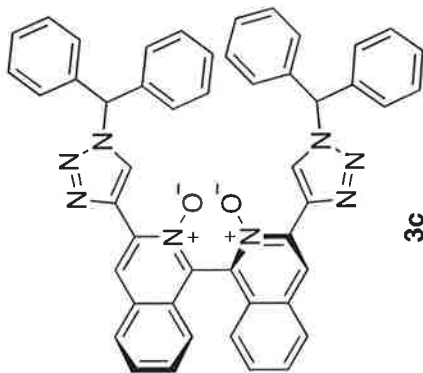

S50

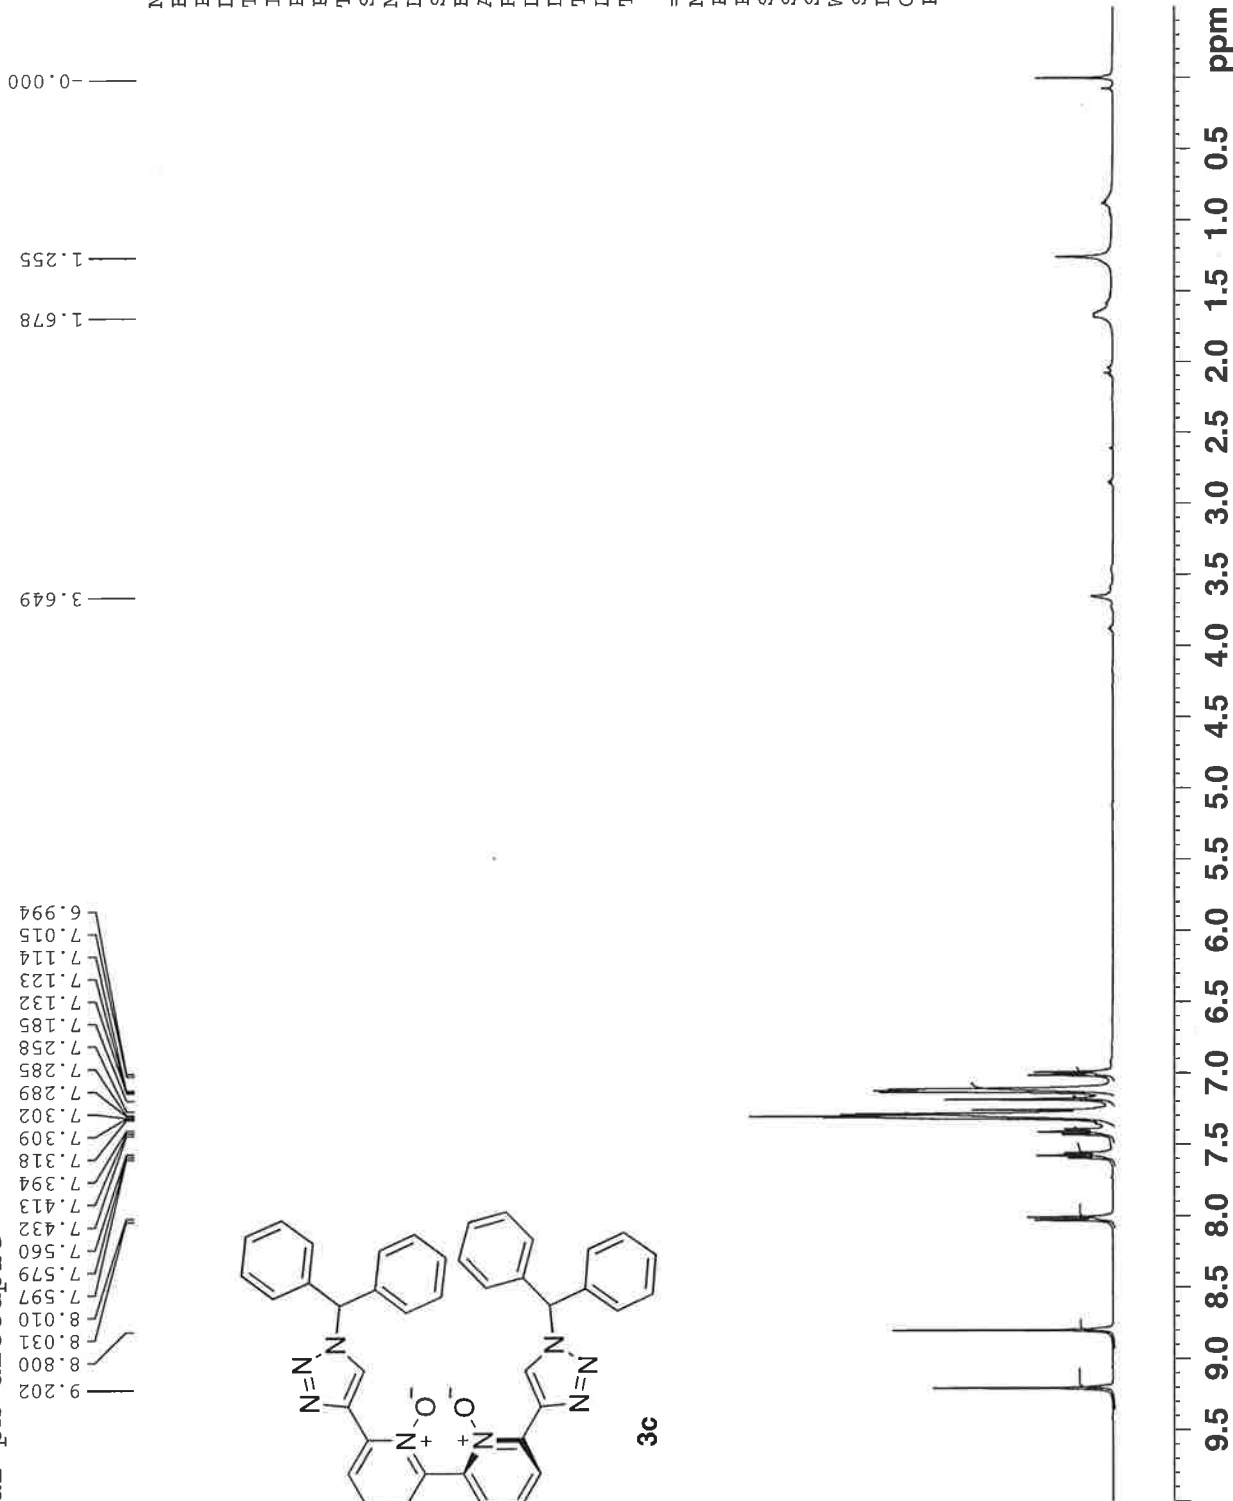

Feb18-2021  
NAME  
EXPNO 10  
PROCNO 1  
Date\_ 20210218  
Time 16.54  
INSTRUM spect  
PROBHD 5 mm PABBO BB-  
PULPROG zg30  
TD 65536  
SOLVENT CDCl3  
NS 16  
DS 2  
SWH 8278.146 Hz  
FIDRES 0.126314 Hz  
AQ 3.9584243 sec  
RG 181  
DW 60.400 usec  
DE 6.50 usec  
TE 295.0 K  
D1 1.00000000 sec  
TD0 1  
===== CHANNEL f1 =====  
NUC1 1H  
P1 11.60 usec  
PL1 3.00 dB  
SFO1 400.1324710 MHz  
SI 32768  
SF 400.1300103 MHz  
WDW EM  
SSB 0  
LB 0.30 Hz  
GB 0  
PC 1.00

di-Ph di-coupled

139.14  
138.825  
138.381  
137.657  
137.578  
130.005  
129.074  
128.932  
128.905  
128.588  
128.542  
128.237  
128.135  
128.023  
127.888  
126.610  
123.077  
122.833

77.318  
77.000  
76.682  
68.465

-0.029

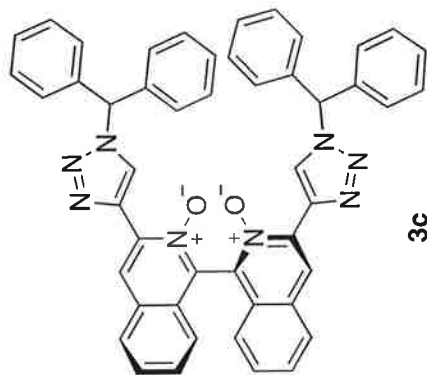

NAME Feb07-2021  
EXPNO 31  
PROCNO 1  
Date\_ 20210207  
Time 21.17  
INSTRUM spect  
PROBHD 5 mm FAPBO BB-  
PULPROG zgpg30  
TD 65536  
SOLVENT CDC13  
NS 10000  
DS 4  
SWH 23980.814 Hz  
FIDRES 0.365918 Hz  
AQ 1.3664756 sec  
RG 32768  
DW 20.850 usec  
DE 6.50 usec  
TE 300.1 K  
D1 2.00000000 sec  
D11 0.03000000 sec  
TDO 1

==== CHANNEL f1 =====  
NUC1 13C  
P1 14.75 usec  
PL1 0.00 dB  
SFO1 100.6228298 MHz

==== CHANNEL f2 =====  
CPDPRG2 waltz16  
NUC2 1H  
PCPD2 80.00 usec  
PL2 -2.00 dB  
PL12 12.54 dB  
PL13 15.00 dB  
SFO2 400.1316005 MHz  
SI 32768  
SF 100.6127712 MHz  
WDW EM  
SSB 0  
LB 1.00 Hz  
GB 0  
PC 1.40

180 160 140 120 100 80 60 40 20 0 ppm

di-Ph mono

9.186  
8.792  
8.330  
8.039  
8.018  
7.838  
7.817  
7.611  
7.591  
7.571  
7.550  
7.468  
7.450  
7.430  
7.412  
7.344  
7.340  
7.329  
7.313  
7.296  
7.262  
7.200  
7.162  
7.157  
7.137  
7.130  
7.117  
7.082  
7.061  
7.025  
7.004

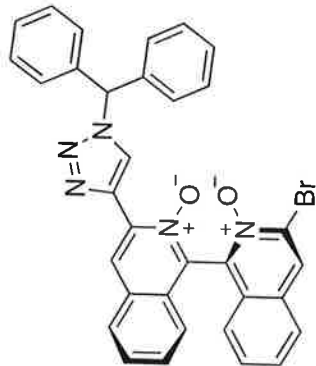

S3

S52

NAME Mar11-2021  
 EXPNO 50  
 PROCNO 1  
 Date\_ 20210311  
 Time 13.36  
 INSTRUM spect  
 PROBHD 5 mm PABBO BB-  
 PULPROG zg30  
 TD 65536  
 SOLVENT CDC13  
 NS 16  
 DS 2  
 SWH 8278.146 Hz  
 FIDRES 0.126314 Hz  
 AQ 3.9584243 sec  
 RG 256  
 DW 60.400 usec  
 DE 6.50 usec  
 TE 294.6 K  
 D1 1.00000000 sec  
 TD0 1

==== CHANNEL f1 =====  
 NUC1 1H  
 P1 11.60 usec  
 PL1 3.00 dB  
 SFO1 400.1324710 MHz  
 SI 32768  
 SF 400.1300088 MHz  
 WDW EM  
 SSB 0  
 LB 0.30 Hz  
 GB 0  
 PC 1.00

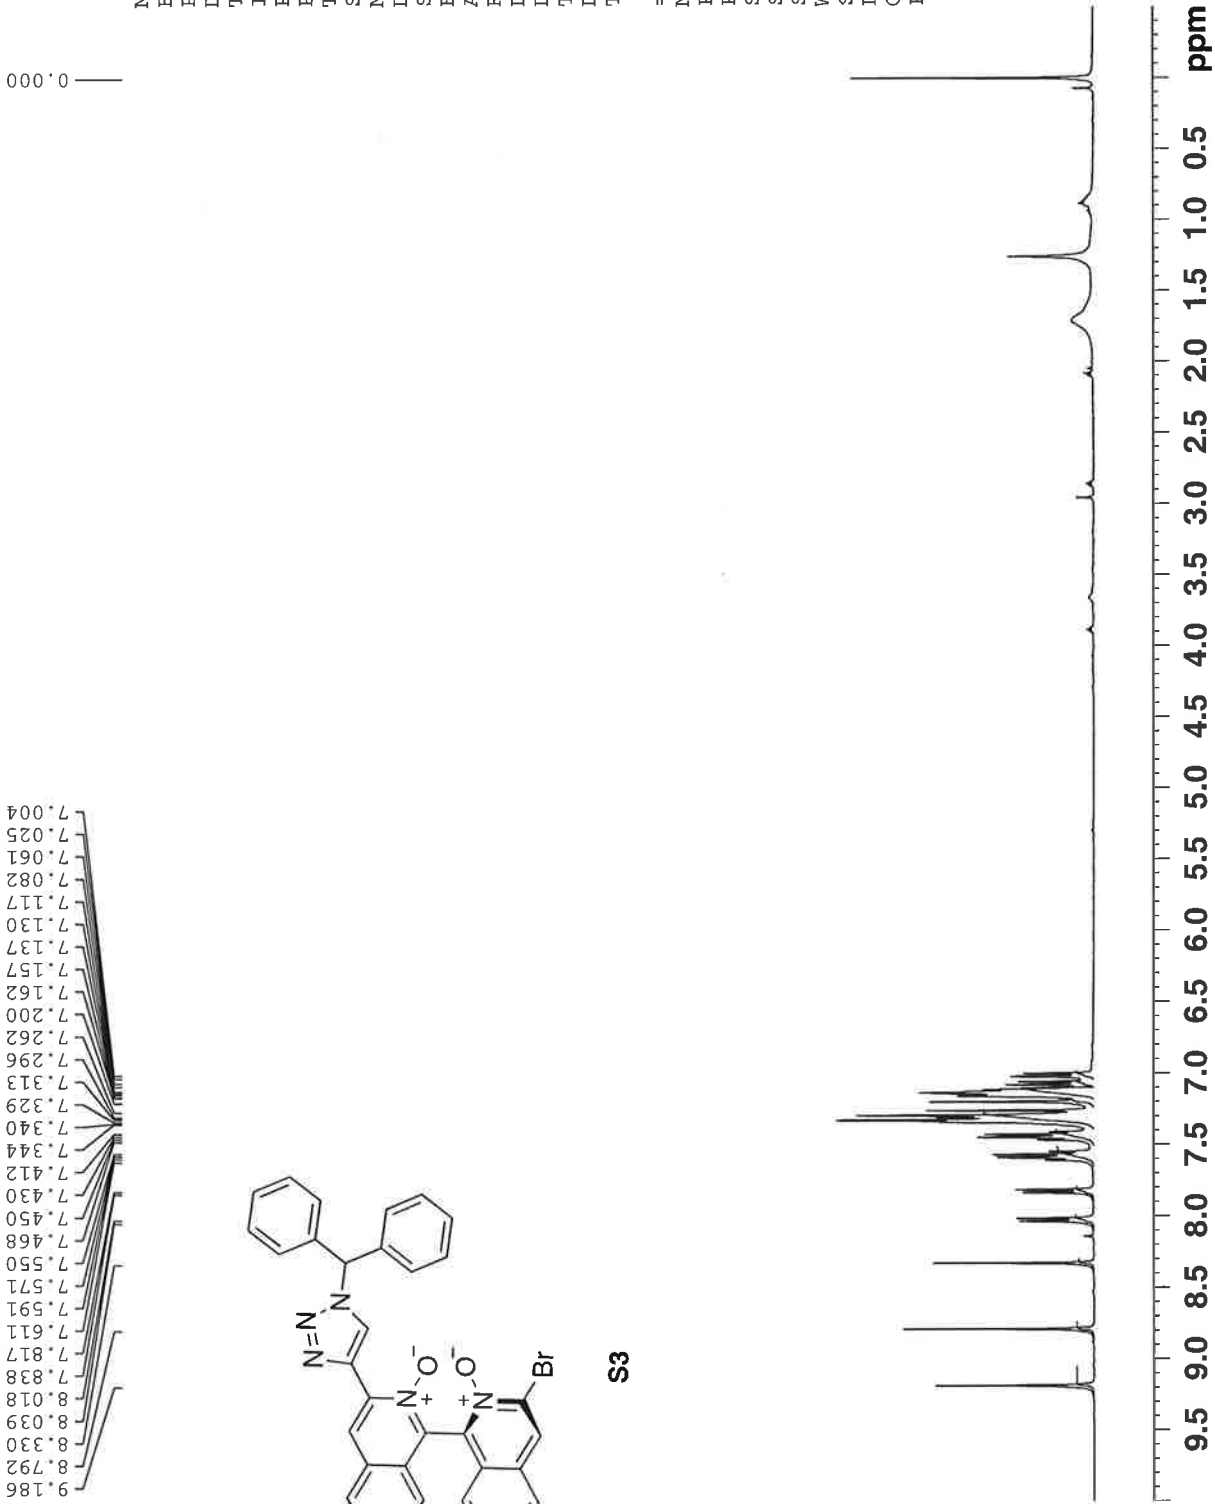

1.000  
0.983  
0.882  
1.062  
0.989  
2.135  
2.222  
6.359  
1.237  
4.221  
1.087  
1.031

di-ph mono

139.069  
138.889  
138.791  
137.919  
137.690  
137.626  
131.207  
130.257  
129.860  
129.129  
128.975  
128.930  
128.831  
128.608  
128.562  
128.254  
128.097  
127.912  
127.865  
126.570  
126.413  
123.444  
122.979  
122.898

77.317  
77.000  
76.682  
68.470

-0.032

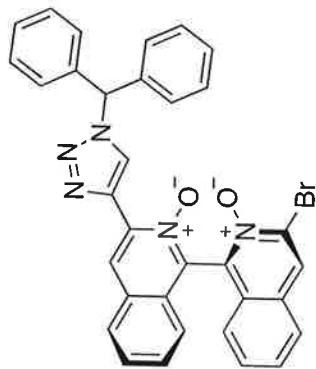

S3

NAME Mar11-2021  
EXPNO 91  
PROCNO 1  
Date\_ 20210312  
Time 7.57  
INSTRUM spect  
PROBHD 5 mm PABBO BB-  
PULPROG zgpg30  
TD 65536  
SOLVENT CDCl3  
NS 12000  
DS 4  
SWH 23980.814 Hz  
FIDRES 0.365918 Hz  
AQ 1.3664756 sec  
RG 32768  
DW 20.850 usec  
DE 6.50 usec  
TE 300.7 K  
D1 2.0000000 sec  
D11 0.0300000 sec  
TD0 1

S53

==== CHANNEL f1 =====  
NUC1 13C  
P1 14.75 usec  
PL1 0.00 dB  
SFO1 100.6228298 MHz  
  
==== CHANNEL f2 =====  
CPDPRG2 waltz16  
NUC2 1H  
PCPD2 80.00 usec  
PL2 -2.00 dB  
PL12 12.54 dB  
PL13 15.00 dB  
SFO2 400.1316005 MHz  
SI 32768  
SF 100.6127709 MHz  
WDW EM  
SSB 0  
LB 1.00 Hz  
GB 0  
PC 1.40

180 160 140 120 100 80 60 40 20 0 ppm

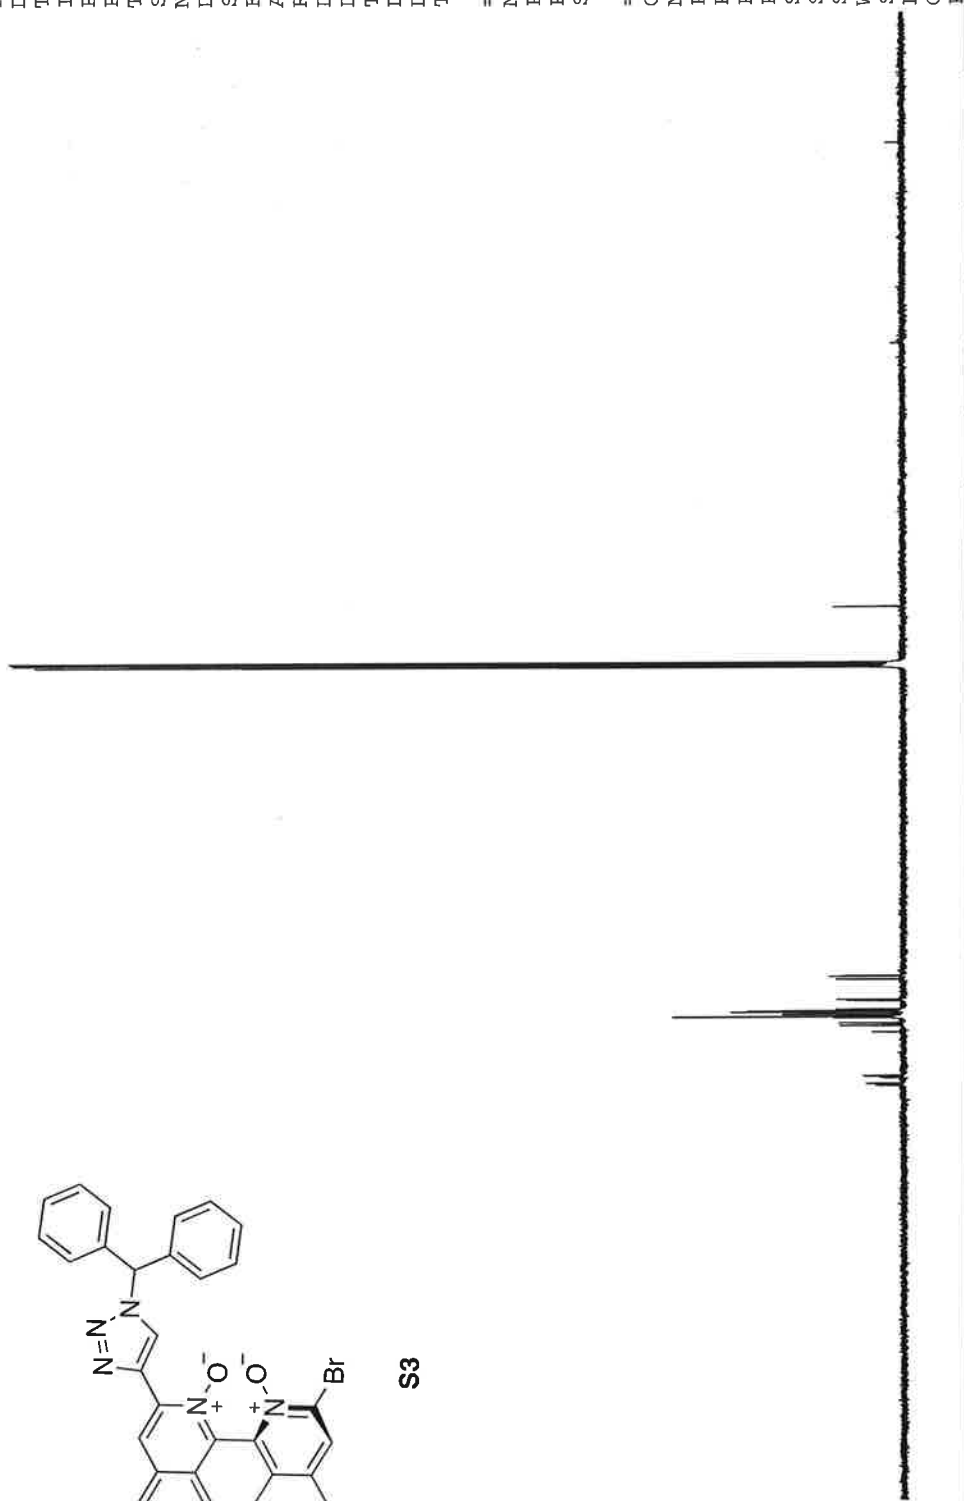

ad di

9.187  
9.022  
8.063  
8.042  
7.617  
7.598  
7.579  
7.448  
7.428  
7.410  
7.263  
7.084  
7.062

2.261  
2.236  
1.800  
1.762  
1.723  
1.573

-0.000

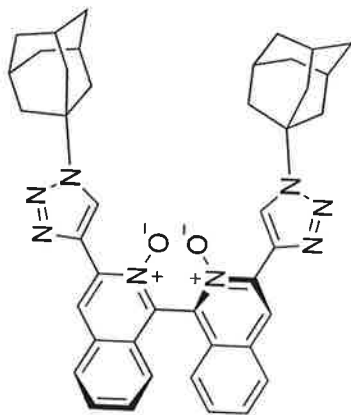

S54

3d

NAME Feb02-2021  
EXPNO 40  
PROCNO 1  
Date\_ 20210202  
Time 11.39  
INSTRUM spect  
PROBHD 5 mm PABBO BB-  
PULPROG zg30  
TD 65536  
SOLVENT CDC13  
NS 16  
DS 2  
SWH 8278.146 Hz  
FIDRES 0.126314 Hz  
AQ 3.9584243 sec  
RG 362  
DW 60.400 usec  
DE 6.50 usec  
TE 294.4 K  
D1 1.00000000 sec  
TD0 1

==== CHANNEL f1 =====  
NUC1 1H  
P1 11.60 usec  
PL1 3.00 dB  
SFO1 400.1324710 MHz  
SI 32768  
SF 400.1300085 MHz  
WDW EM  
SSB 0  
LB 0.30 Hz  
GB 0  
PC 1.00

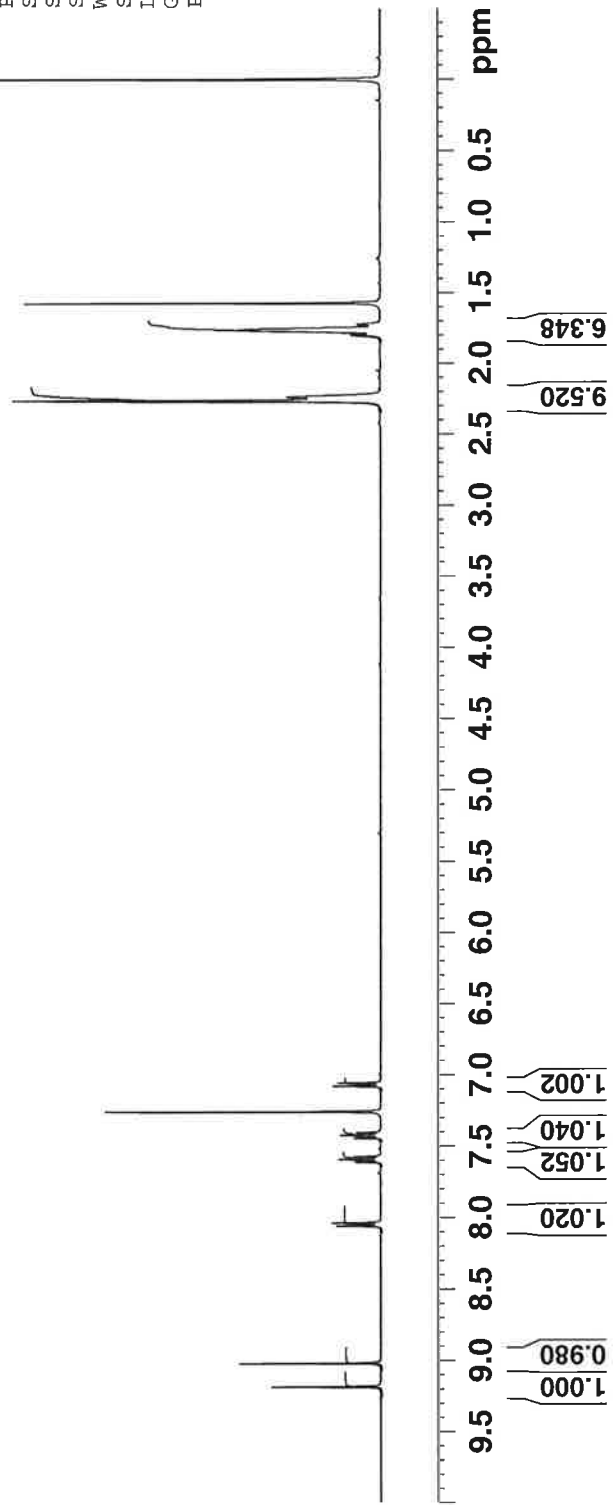

ad di couple

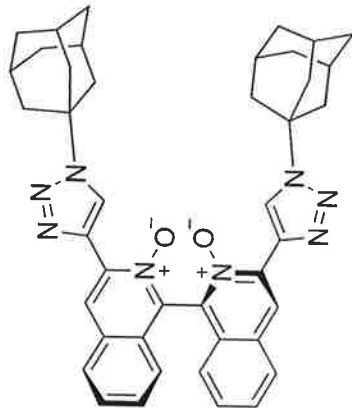

3d

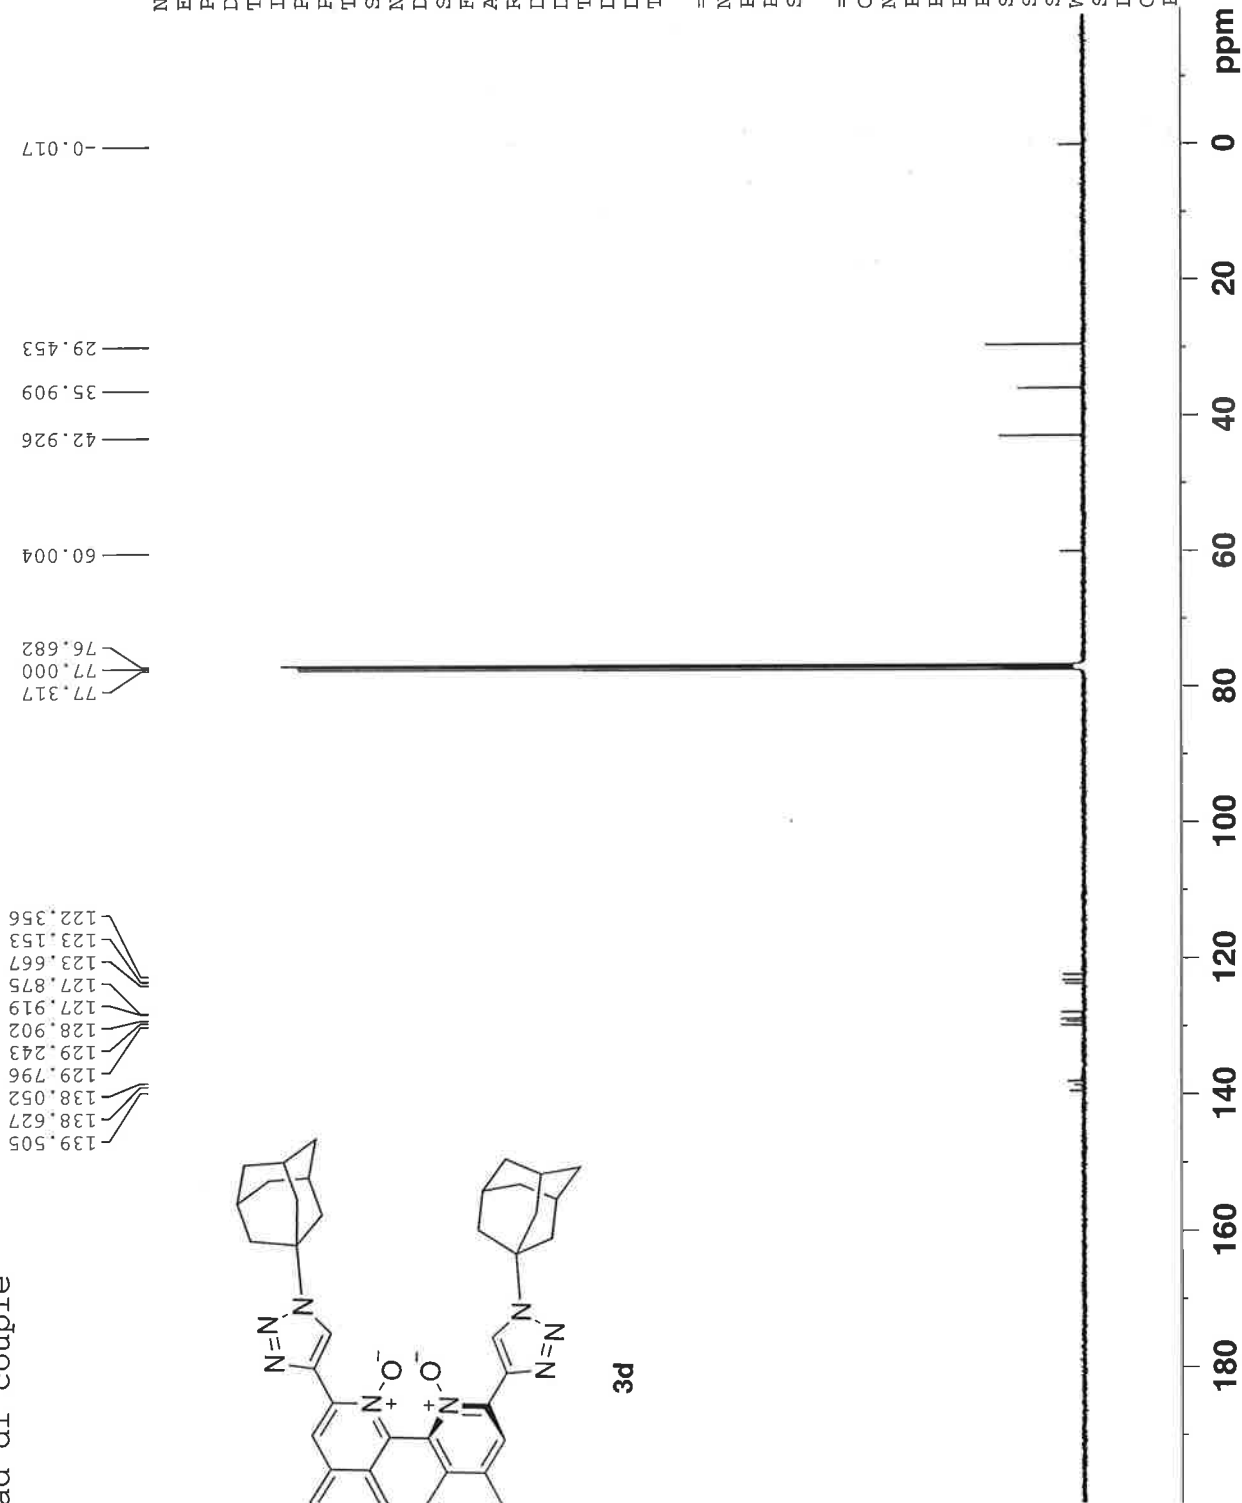

Feb01-2021  
NAME  
EXPNO 81  
PROCNO 1  
Date\_ 20210202  
Time 7.55  
INSTRUM spect  
PROBHD 5 mm PABBO BB-  
PULPROG zgpg30  
TD 65536  
SOLVENT CDCl3  
NS 12000  
DS 4  
SWH 23980.814 Hz  
FIDRES 0.365918 Hz  
AQ 1.3664756 sec  
RG 32768  
DW 20.850 usec  
DE 6.50 usec  
TE 300.4 K  
D1 2.00000000 sec  
D11 0.03000000 sec  
TD0 1

==== CHANNEL f1 =====  
NUC1 13C  
P1 14.75 usec  
PL1 0.00 dB  
SFO1 100.6228298 MHz

==== CHANNEL f2 =====  
CPDPRG2 waltz16  
NUC2 1H  
PCPD2 80.00 usec  
PL2 -2.00 dB  
PL12 12.54 dB  
PL13 15.00 dB  
SFO2 400.1316005 MHz  
SI 32768  
SF 100.6127680 MHz  
WDW EM  
SSB 0  
LB 1.00 Hz  
GB 0  
PC 1.40

ad mono couple

9.145  
8.982  
8.360  
8.044  
8.023  
8.023  
7.862  
7.842  
7.614  
7.596  
7.585  
7.566  
7.479  
7.457  
7.437  
7.417  
7.265  
7.102  
7.081  
7.069  
7.048

2.269  
2.246  
1.807  
1.770  
1.734  
1.636  
1.256  
1.209  
0.880  
0.880  
0.863  
0.829

NAME Jan27-2021  
EXPNO 20  
PROCNO 1  
Date\_ 20210127  
Time 12.13  
INSTRUM spect  
PROBHD 5 mm PABBO BB-  
PULPROG zg30  
TD 65536  
SOLVENT CDCl3  
NS 16  
DS 2  
SWH 8278.146 Hz  
FIDRES 0.126314 Hz  
AQ 3.9584243 sec  
RG 256  
DW 60.400 usec  
DE 6.50 usec  
TE 295.7 K  
D1 1.00000000 sec  
TD0 1

==== CHANNEL f1 =====  
NUC1 1H  
P1 11.60 usec  
PL1 3.00 dB  
SFO1 400.1324710 MHz  
SI 32768  
SF 400.1300079 MHz  
WDW EM  
SSB 0  
LB 0.30 Hz  
GB 0  
PC 1.00

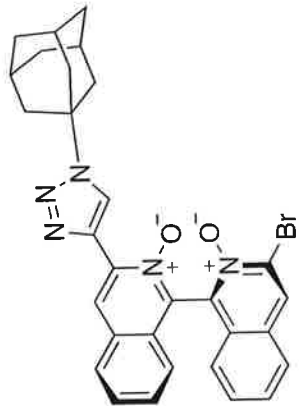

S4

S56

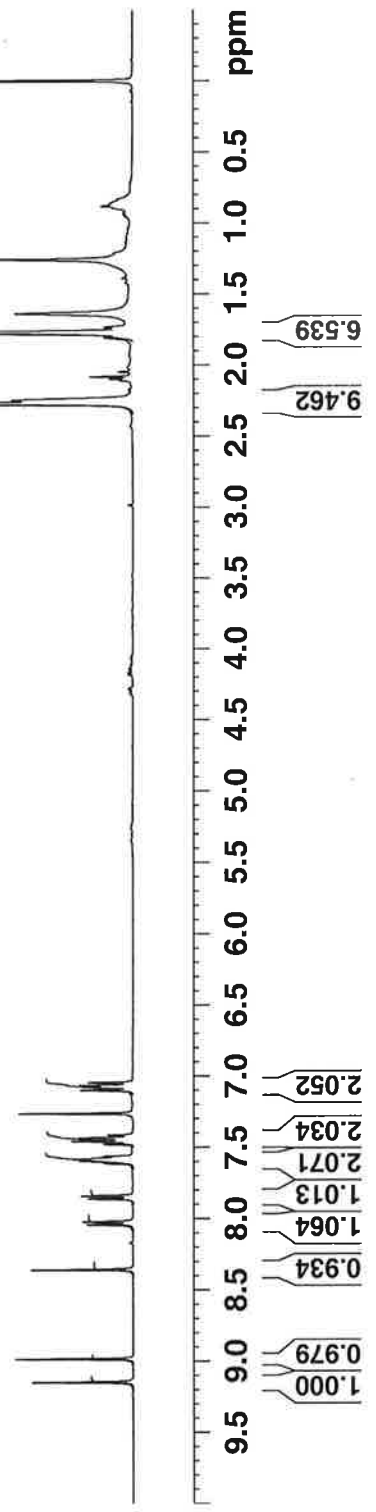



mono ad triazole bigino

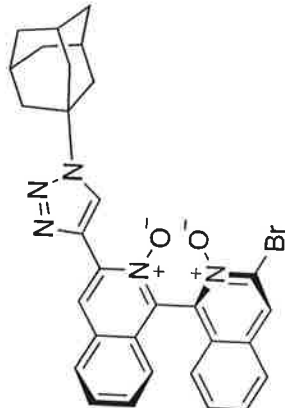

S4

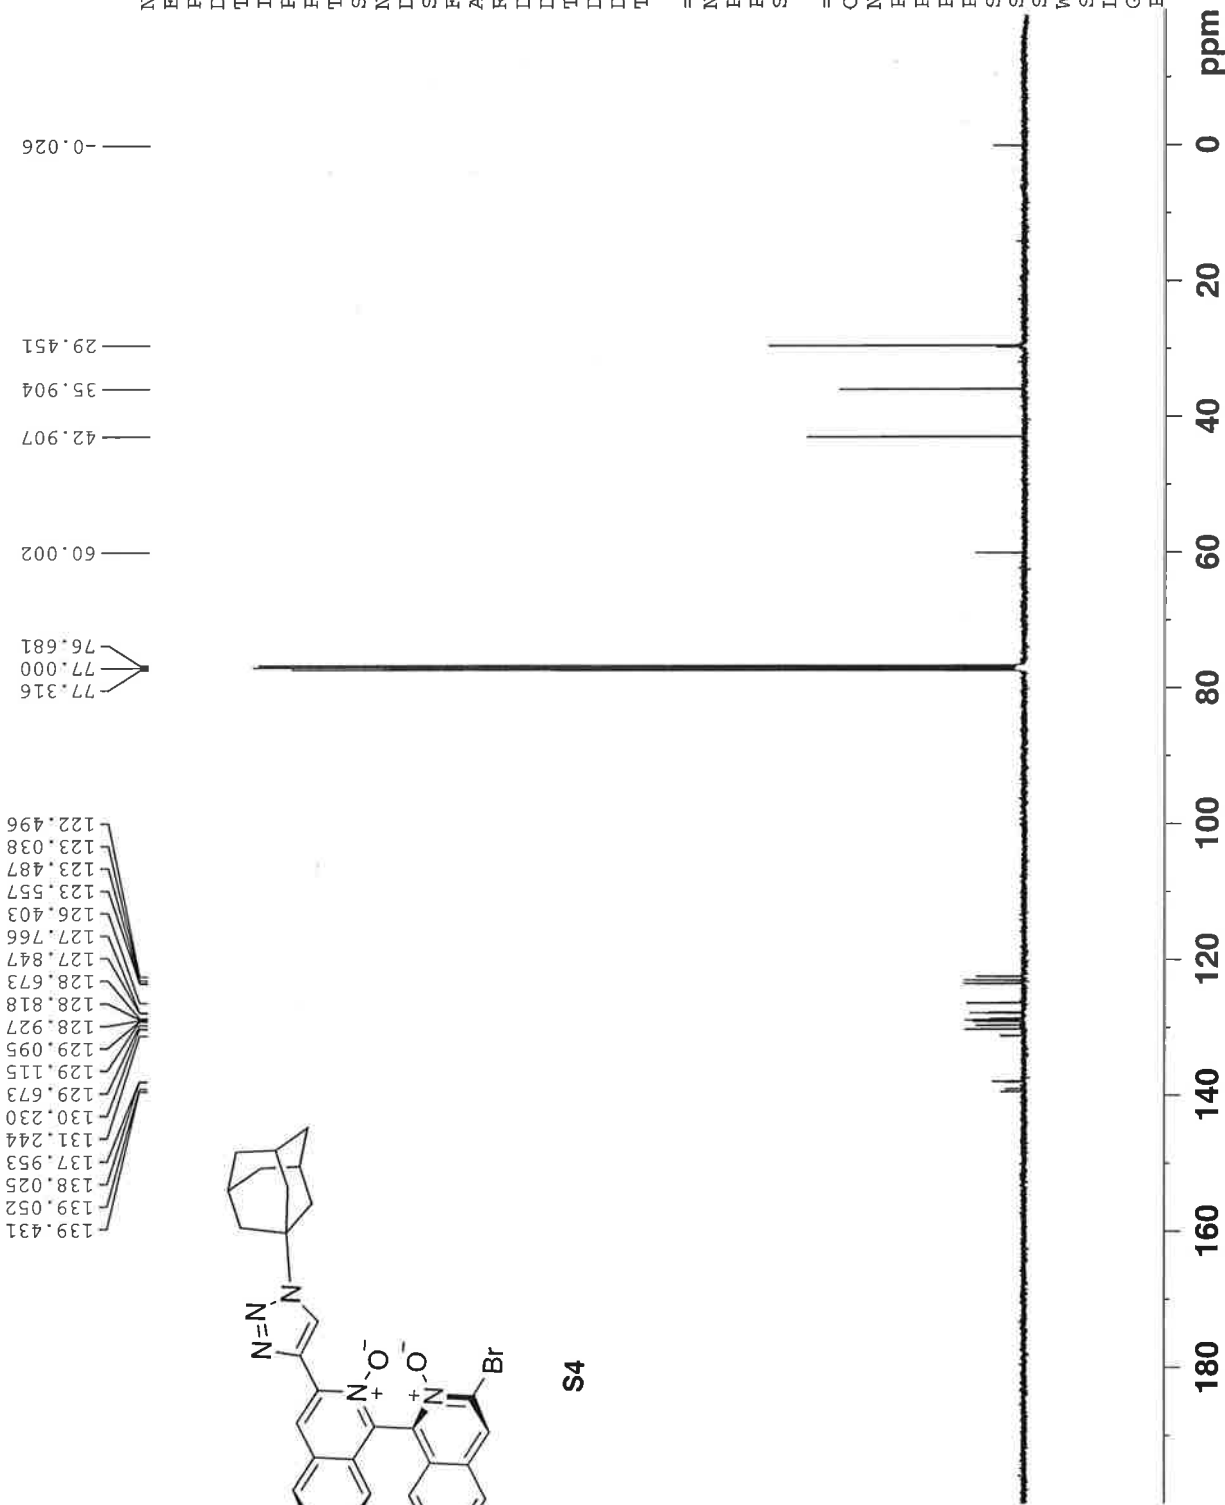

```

NAME                               Jan27-2021
EXPNO                               130
PROCNO                               1
Date_                               20210128
Time_                               6.57
INSTRUM                             spect
PROBHD                               5 mm PABBO BB-
PULPROG                             zgpg30
TD                                   65536
SOLVENT                             CDCl3
NS                                   12000
DS                                   4
SWH                                  23980.814 Hz
FIDRES                              0.365918 Hz
AQ                                  1.3664756 sec
RG                                   32768
DW                                  20.850 usec
DE                                  6.50 usec
TE                                   300.6 K
D1                                  2.00000000 sec
D11                                 0.03000000 sec
TD0                                  1

===== CHANNEL f1 =====
NUC1                                 13C
P1                                  14.75 usec
PL1                                 0.00 dB
SFO1                                100.6228298 MHz

===== CHANNEL f2 =====
CPDPRG2                             waitz16
NUC2                                 1H
PCPD2                                80.00 usec
PL2                                 -2.00 dB
PL12                                12.54 dB
PL13                                15.00 dB
SFO2                                400.1316005 MHz
SI                                  32768
SF                                  100.6127689 MHz

WDW                                  EM
SSB                                  0
LB                                  1.00 Hz
GB                                  0
PC                                  1.40
    
```

NAME Aug04-2021-clr  
 EXPNO 2  
 PROCNO 1  
 Date 20210804  
 Time 14.46  
 INSTRUM spect  
 PROBD 5 mm TBI IH/31  
 PULPROG zg30  
 TD 65536  
 SOLVENT CDCl3  
 NS 16  
 DS 2  
 SWH 8278.146 Hz  
 FIDRES 0.126314 Hz  
 AQ 3.9584243 sec  
 RG 14596.5  
 DW 60.400 usec  
 DE 6.50 usec  
 TE 300.0 K  
 D1 1.00000000 sec  
 TD0 1

===== CHANNEL f1 =====  
 NUC1 1H  
 P1 18.75 usec  
 PL1 0.50 dB  
 SFO1 400.1324710 MHz  
 SI 32768  
 SF 400.1300122 MHz  
 WDW EM  
 SSB 0  
 LB 0.30 Hz  
 GB 0  
 PC 1.00

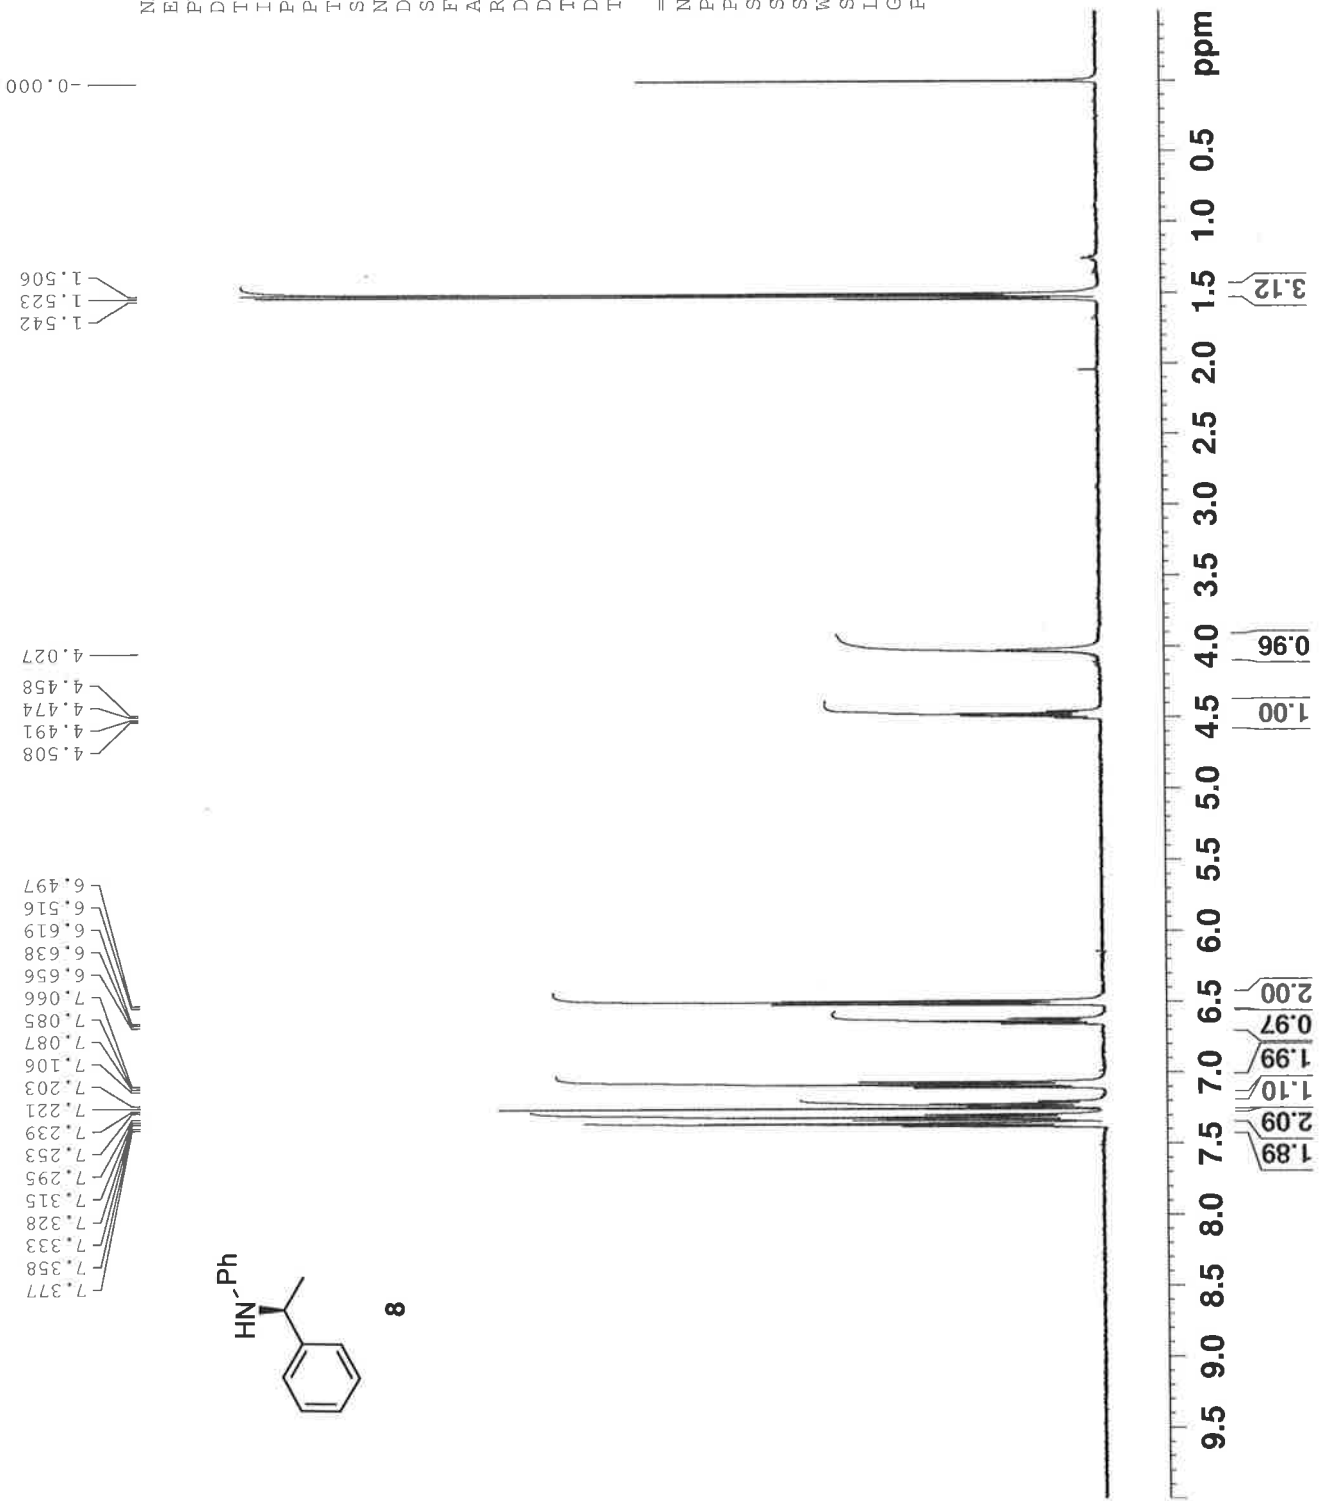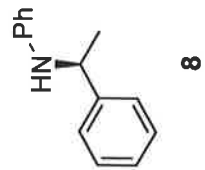

crv-273 pure

8.86  
8.71

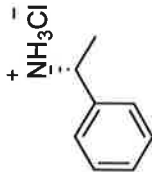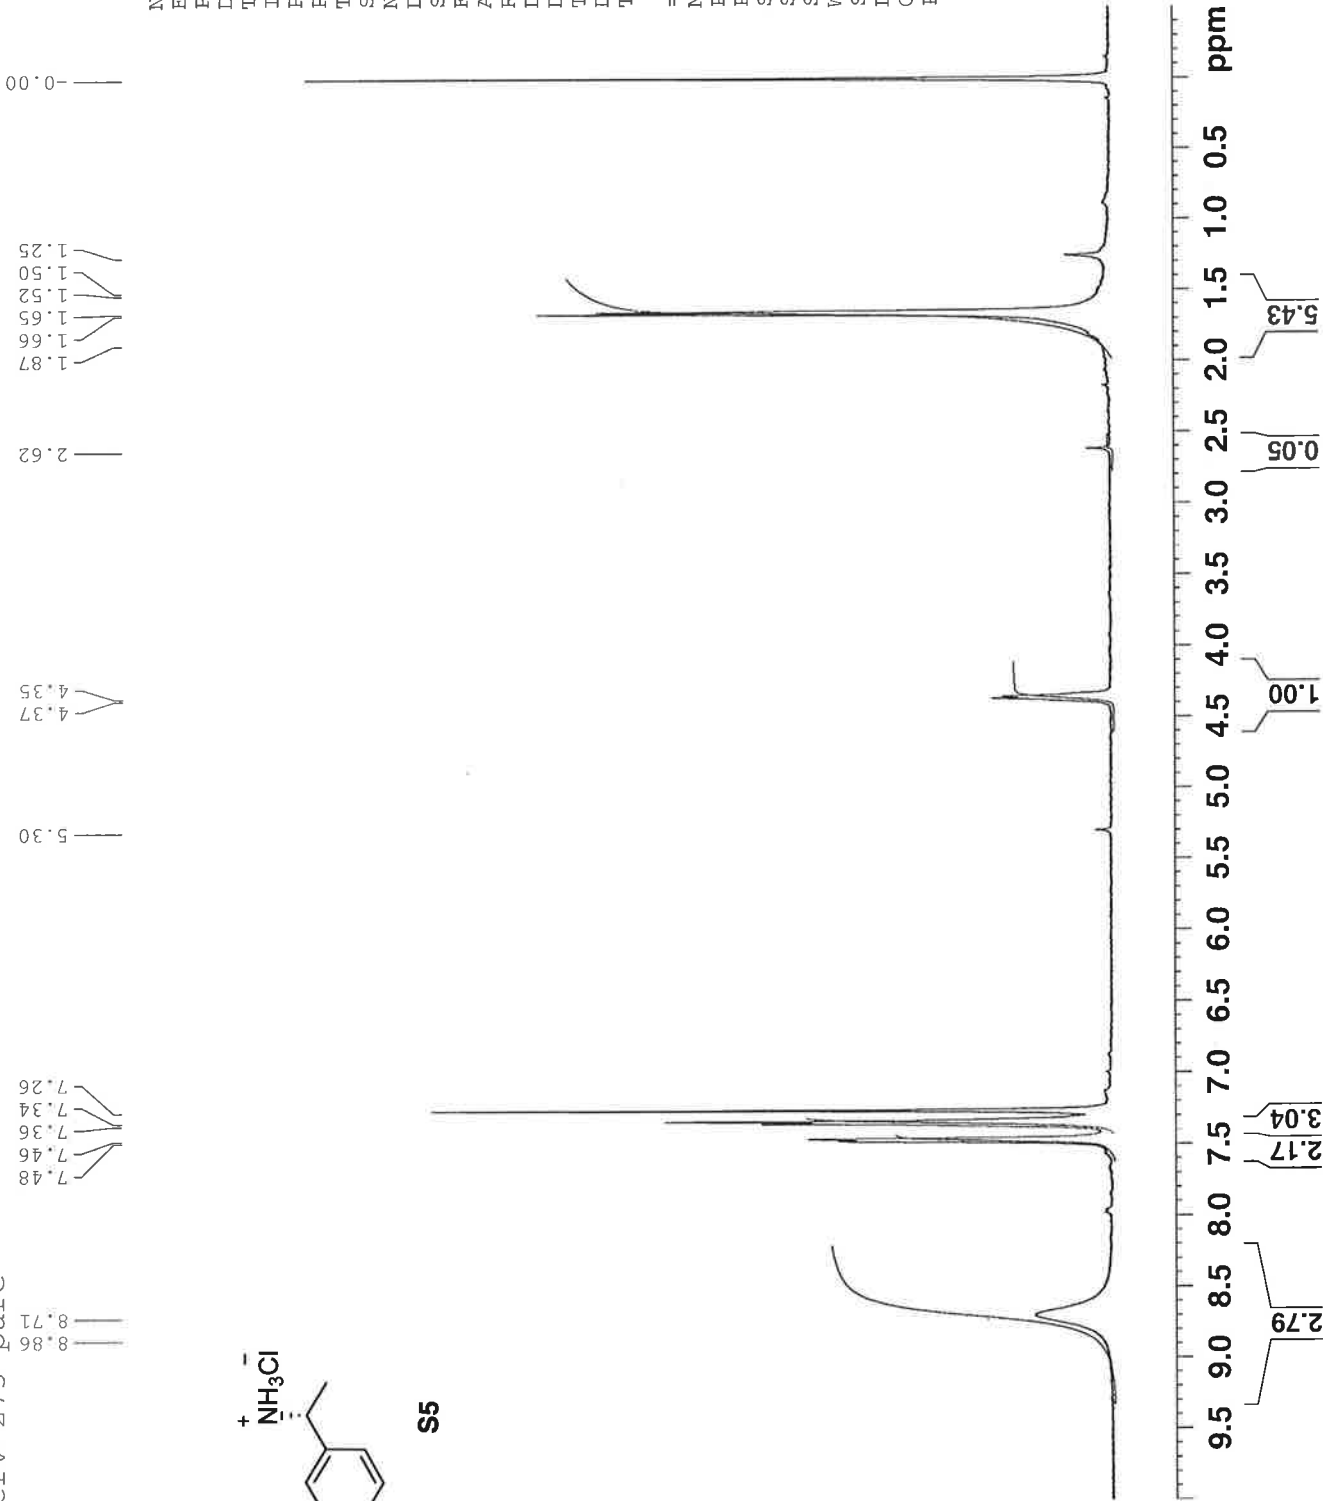

NAME Oct09-2020  
 EXPNO 20  
 PROCNO 1  
 Date 20201009  
 Time 8.59  
 INSTRUM spect  
 PROBHD 5 mm PABBO BB-  
 PULPROG zg30  
 TD 65536  
 SOLVENT CDCl3  
 NS 16  
 DS 2  
 SWH 8278.146 Hz  
 FIDRES 0.126314 Hz  
 AQ 3.9584243 sec  
 RG 362  
 DW 60.400 usec  
 DE 6.50 usec  
 TE 295.8 K  
 D1 1.00000000 sec  
 TD0 1

==== CHANNEL f1 =====  
 NUC1 1H  
 P1 11.60 usec  
 PL1 3.00 dB  
 SFO1 400.1324710 MHz  
 SI 32768  
 SF 400.1300087 MHz  
 WDW EM  
 SSB 0  
 LB 0.30 Hz  
 GB 0  
 PC 1.00

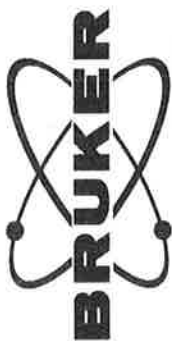

NAME Aug05-2021

EXPNO 3

PROCNO 1

Date\_ 20210805

Time 15.59

INSTRUM spect

PROBHD 5 mm TBI 1H/31

PULPROG zg30

TD 65536

SOLVENT CDCl3

NS 16

DS 2

SWH 8278.146 Hz

FIDRES 0.126314 Hz

AQ 3.9584243 sec

RG 20642.5

DW 60.400 usec

DE 6.50 usec

TE 300.0 K

D1 1.00000000 sec

TD0 1

```

===== CHANNEL f1 =====
NUC1      1H
P1        18.75 usec
PL1       0.50 dB
SF01     400.1324710 MHz
SI        32768
SF        400.1300092 MHz
WDW       EM
SSB       0
LB        0.30 Hz
GB        0
PC        1.00

```

2.046  
1.626  
1.608  
1.597  
1.578

5.367  
5.349  
5.331  
5.314

7.782  
7.764  
7.761  
7.516  
7.497  
7.479  
7.445  
7.426  
7.410  
7.394  
7.383  
7.365  
7.346  
7.303  
7.286  
7.261  
6.319

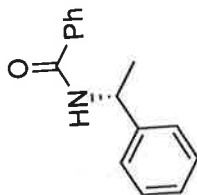

S6

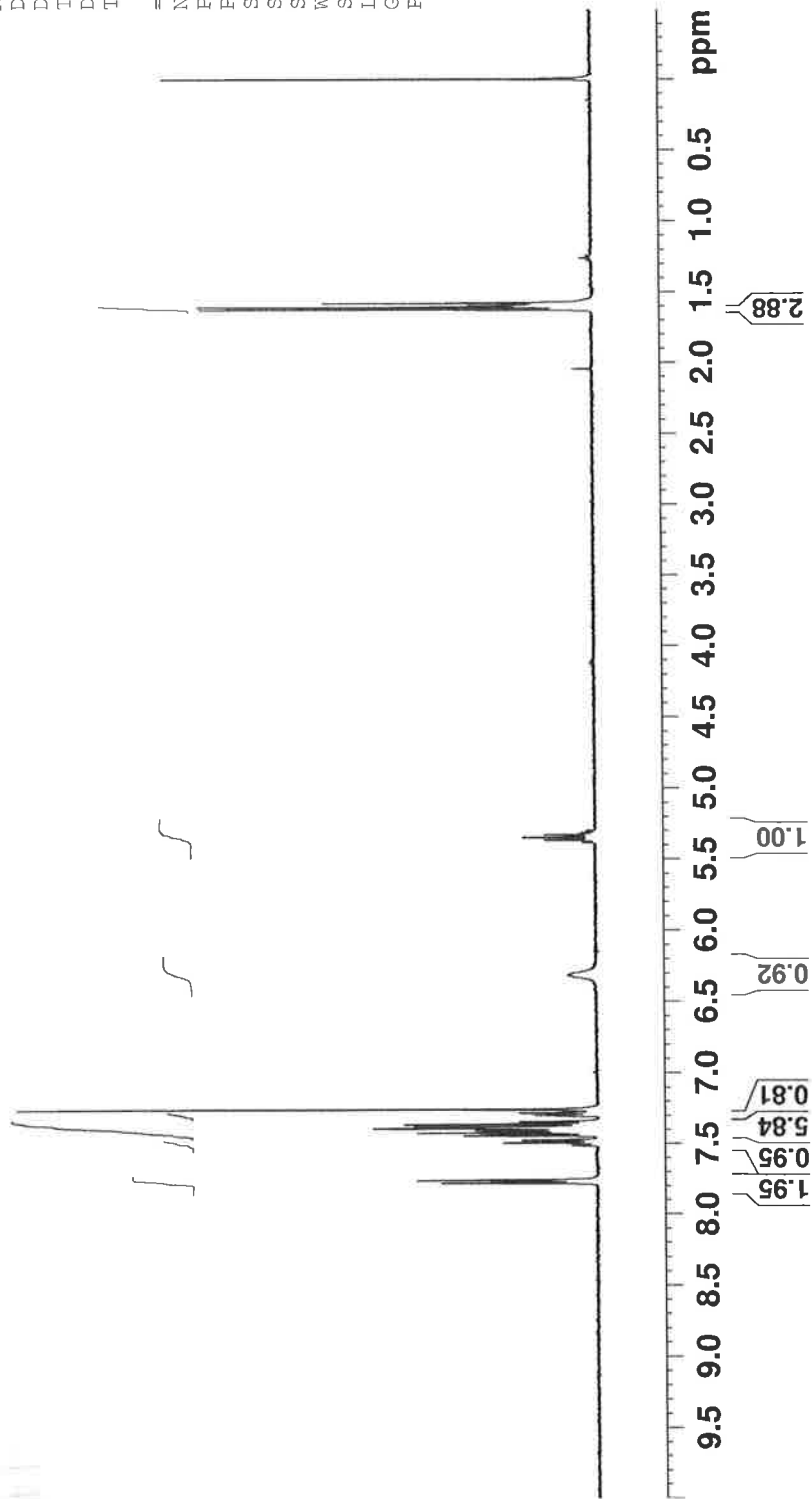

RUN\_1125.DATA - Prostar 335 Absorbance Analog Channel 1 EL05079024

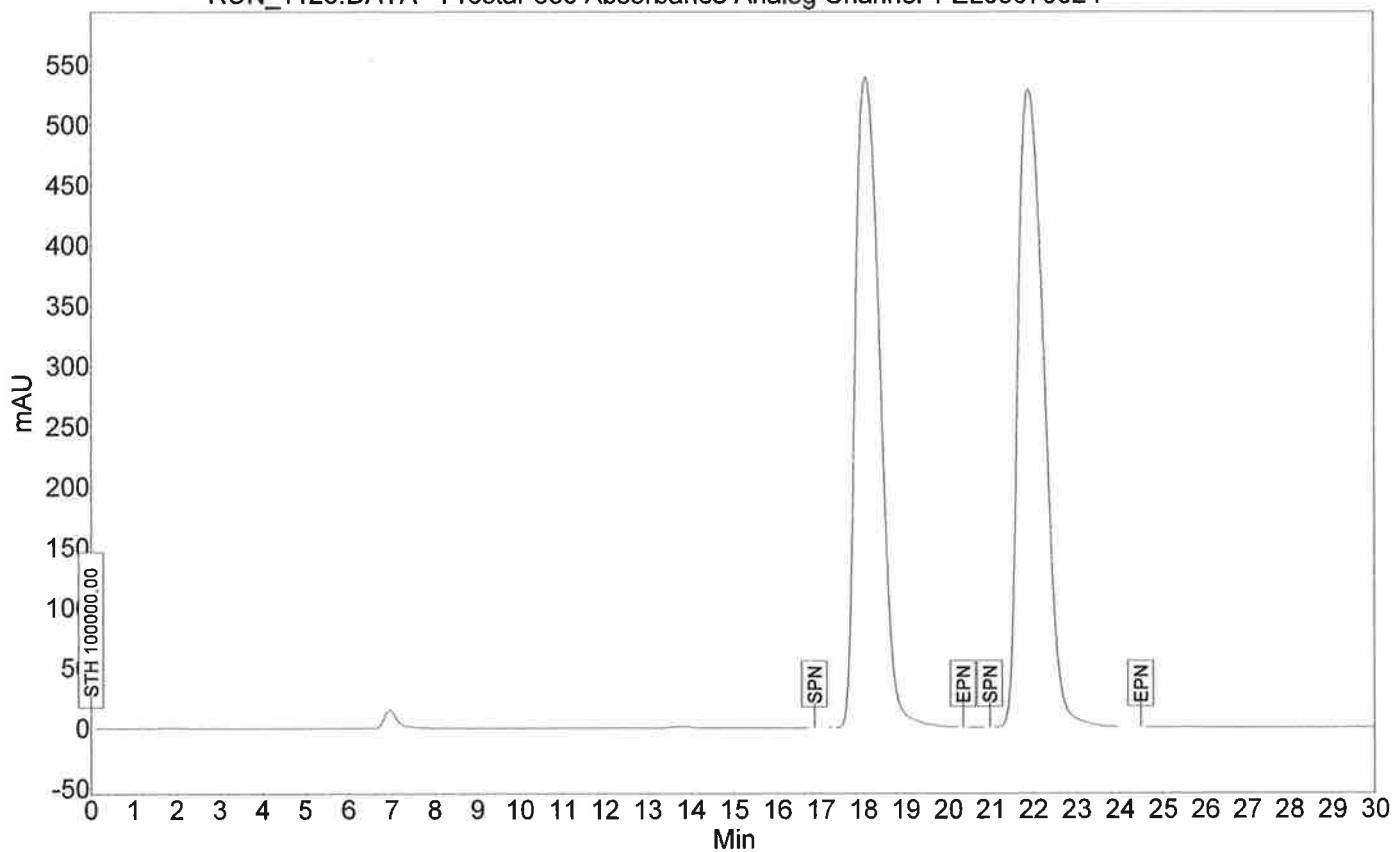

| Index | Name    | Time [Min] | Quantity [% Area] | Height [mAU] | Area [mAU.Min] | Area % [%] |
|-------|---------|------------|-------------------|--------------|----------------|------------|
| 1     | UNKNOWN | 18.09      | 49.60             | 539.9        | 363.2          | 49.602     |
| 2     | UNKNOWN | 21.91      | 50.40             | 529.4        | 369.0          | 50.398     |
| Total |         |            | 100.00            | 1069.4       | 732.2          | 100.000    |

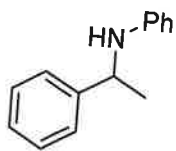

8

RUN\_54.DATA - Prostar 335 Absorbance Analog Channel 1 EL05079024

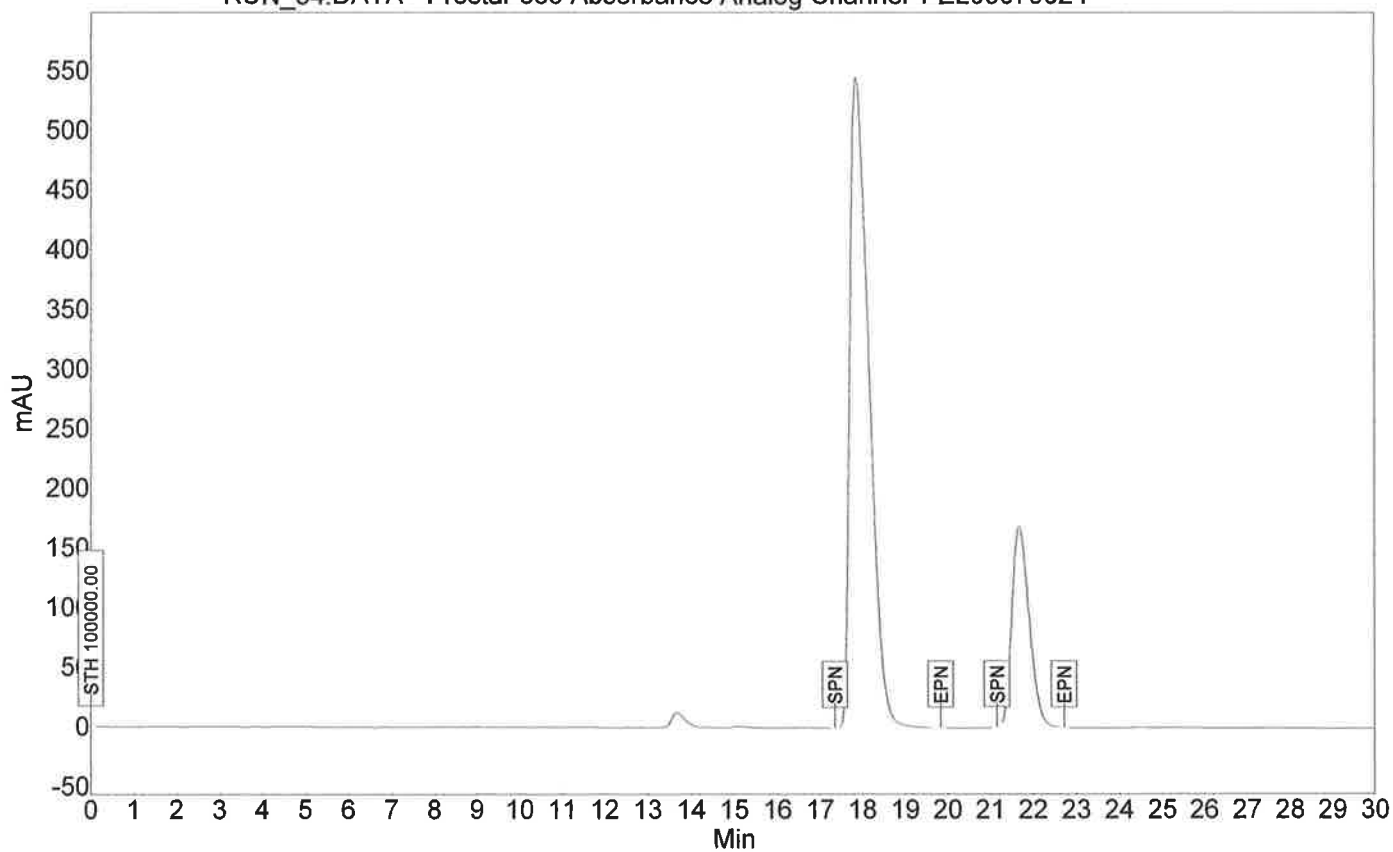

| Index | Name    | Time [Min] | Quantity [% Area] | Height [mAU] | Area [mAU.Min] | Area % [%] |
|-------|---------|------------|-------------------|--------------|----------------|------------|
| 1     | UNKNOWN | 17.85      | 78.01             | 545.6        | 283.0          | 78.014     |
| 2     | UNKNOWN | 21.67      | 21.99             | 168.7        | 79.8           | 21.986     |
| Total |         |            | 100.00            | 714.3        | 362.8          | 100.000    |

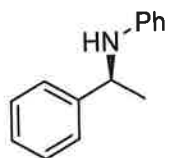

8

RUN\_9.DATA - Prostar 335 Absorbance Analog Channel 1 EL05079024

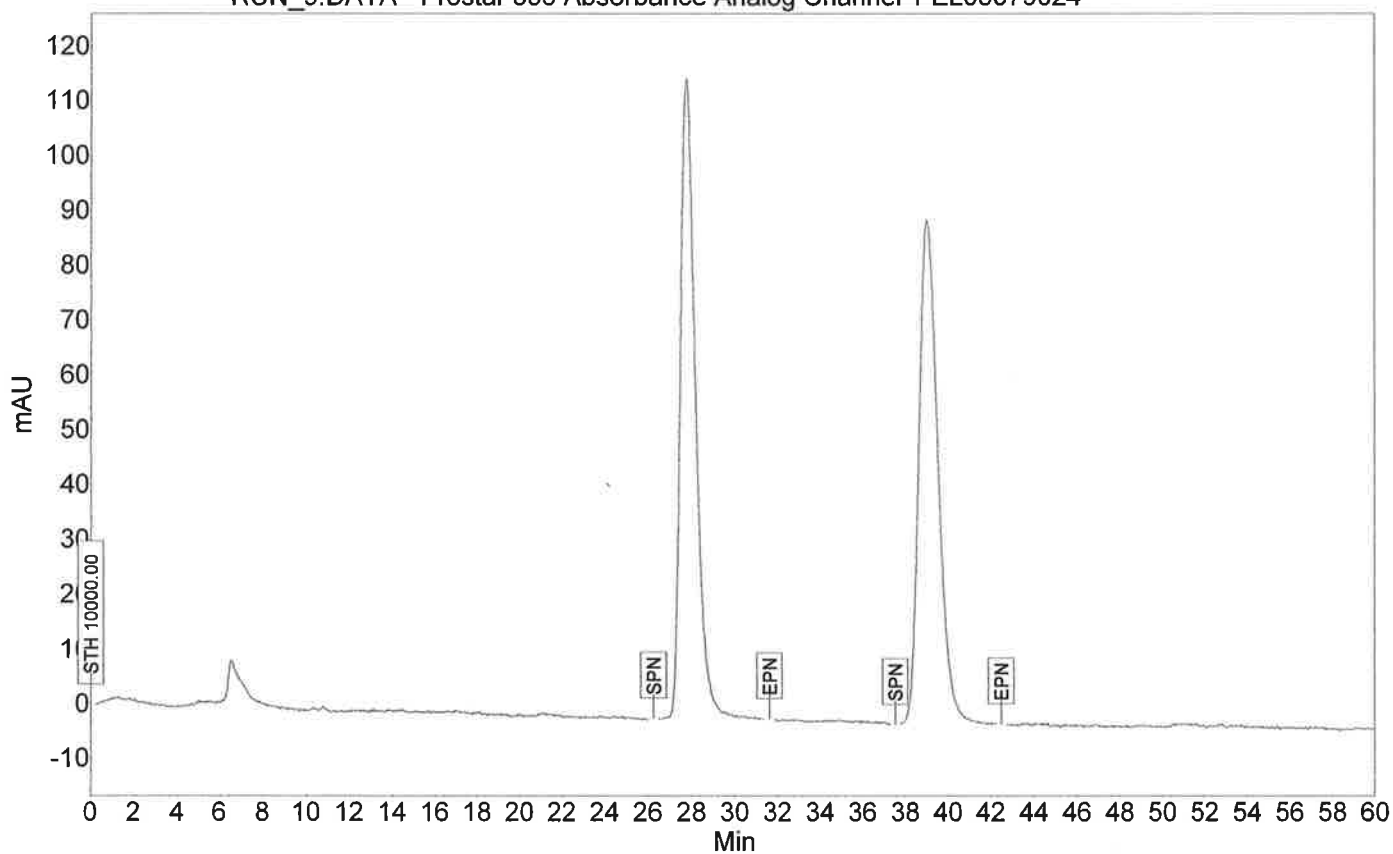

| Index | Name    | Time [Min] | Quantity [% Area] | Height [mAU] | Area [mAU.Min] | Area % [%] |
|-------|---------|------------|-------------------|--------------|----------------|------------|
| 1     | UNKNOWN | 27.77      | 49.81             | 116.8        | 94.5           | 49.806     |
| 2     | UNKNOWN | 39.03      | 50.19             | 92.1         | 95.3           | 50.194     |
| Total |         |            | 100.00            | 208.8        | 189.8          | 100.000    |

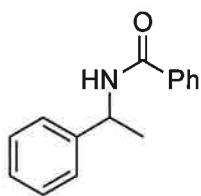

S6

RUN\_911.DATA - Prostar 335 Absorbance Analog Channel 1 EL05079024

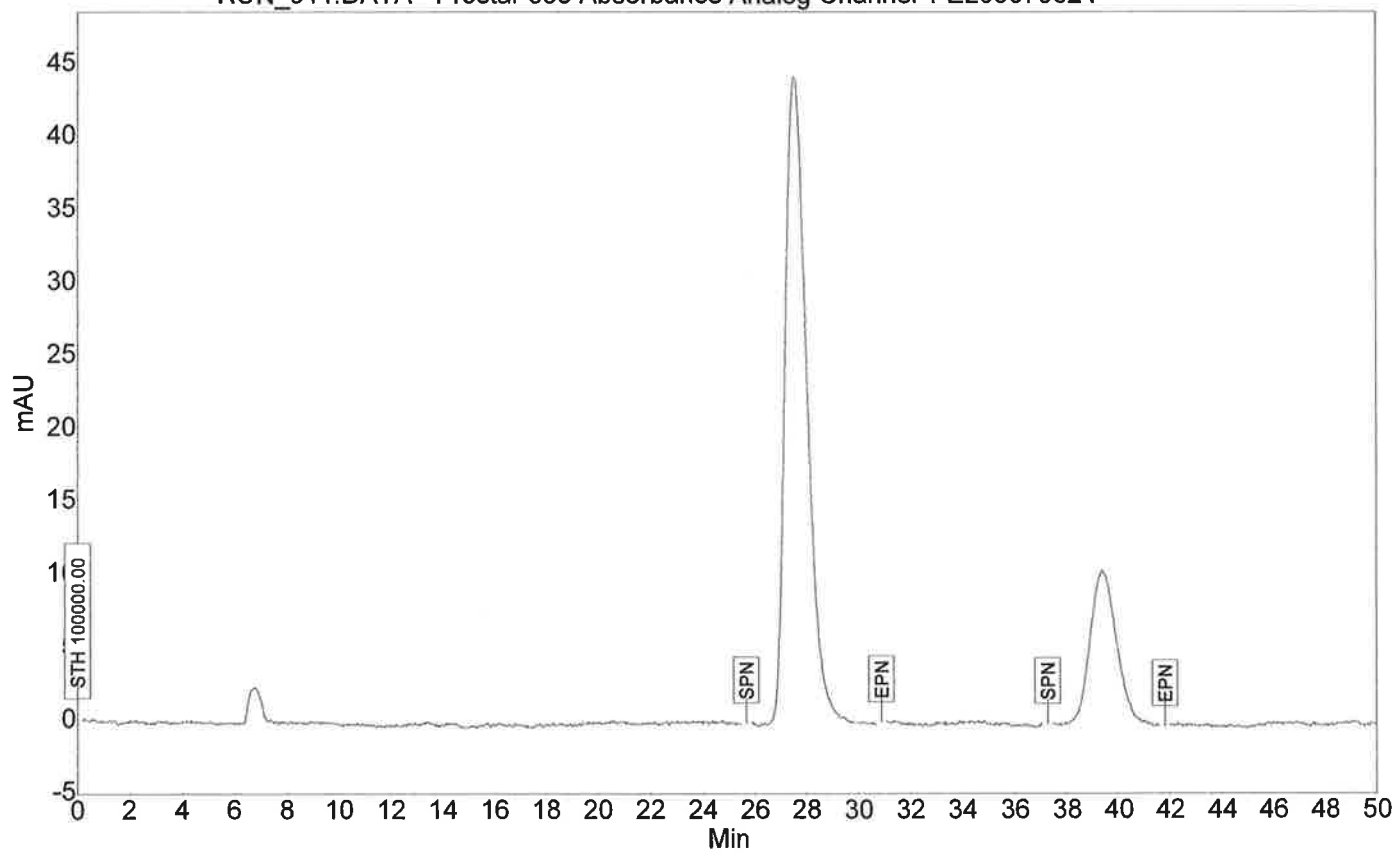

| Index | Name    | Time [Min] | Quantity [% Area] | Height [mAU] | Area [mAU.Min] | Area % [%] |
|-------|---------|------------|-------------------|--------------|----------------|------------|
| 1     | UNKNOWN | 27.53      | 76.98             | 44.3         | 43.3           | 76.981     |
| 2     | UNKNOWN | 39.36      | 23.02             | 10.7         | 13.0           | 23.019     |
| Total |         |            | 100.00            | 55.0         | 56.3           | 100.000    |

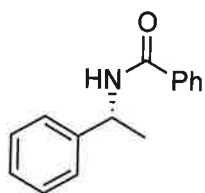

**S6**
